# Supplementary material for: A Geographically Diverse Collection of Schizosaccharomyces pombe Isolates Shows Limited Phenotypic Variation but Extensive Karyotypic Diversity
Source: PubMed Central journal article supplement (PMC3276172; doi:10.1534/g3.111.001123), 2011-12-01
Supplement: supp_1.7.615_001123SI.pdf [file supp_1.7.615_001123SI.pdf]

## File S1

### Supporting Text

#### 1 Strain collection

We used the web, the scientific literature and personal contacts to identify strain collections holding isolates of fission yeast. This led to a collection which includes 84 isolates of *S. pombe* (supplementary data Table 1). Each isolate in our collection retains its original designation. All but one of the strains were haploid as judged by DNA staining. The one strain; NCYC 2355, that was diploid yielded isogenic haploid clones upon re-streaking and we worked with one of these and for this reason it is marked with an asterisk. DBVPG 4433 is listed as *Zygosaccharomyces* but was found to contain fission yeast upon colony purification by GL.

#### 2 Structural Analysis of re-arranged chromosomes

##### 2.1 Analysis of Nott 143, Nott 145 and other strains containing re-arrangements involving sequences on chromosomes I and II of the laboratory strain.

As shown in the main text chromosome 1 in NOTT 143 was a derivative of chromosome II and chromosome 2 was the reciprocal chromosome I derivative. Micro-array analysis showed that the translocated sequences on NOTT 143 chromosome 1 were derived from two discontinuous regions of laboratory strain chromosome I; from the telomere of the left arm of chromosomes I to sequences between 2,683,519 and 2,683,704 and from sequences between 4,642,534 and 4,643,255 to sequences between 4,911,470 and 4,911,584. This pattern suggested a compound re-arrangement in which sequences from a variant of chromosome I containing a large pericentric inversion were translocated onto chromosome II. We used the micro-array data to design primers flanking hypothetical breakpoints and confirmed this compound re-arrangement by PCR (supplementary data; figure 2) and determined the identity of the breakpoint sequences and in particular the existence of a 2,227, 883 bp inversion across the centromere of chromosome I of the laboratory strain with respect to NOTT 143. The breakpoint on NOTT 143 chromosome 2 disrupted the gene SPAC30C2.07-1 and generated a truncated fusion protein of unknown functional significance (see below). We wanted to determine whether the inversion was ancestral or derived and we therefore analysed the entire collection for the presence of the inversion by PCR. All of the strains in the collection with the exception of DBVPG2805, NCYC 3092, DBVPG6610, DBVPG 4433, DBVPG 6279, DBVPG 6699, CRUK 972, CRUK 975 contained the sequence organization seen in NOTT 143 with respect to the inversion breakpoints. This suggested that the sequence arrangement in the laboratory strain was a derived trait and we confirmed this by comparison with the arrangement of the relevant sequences in *S. octosporus* and *S. cryophilus* (not shown). In addition to the inversion NOTT 145 was re-arranged by a translocation of between II R and I L giving rise to a derived chromosome 1 that was larger than the laboratory strain chromosome I and a derived chromosome 3 that at 3.2Mb was

slightly smaller than the rDNA containing chromosome. We were able to identify the breakpoint on NOTT 145 chromosome 3 but not on chromosome 1. We used two sets of primers suggesting that the failure to identify the chromosome 1 breakpoint may be due non-reciprocity. In NOTT 145 the chromosome 3 breakpoint was associated with a C-terminal truncation of SPBC24C6.09C-1. Otherwise all breakpoints were reciprocal with respect to the laboratory strain sequence with the exception of the chromosome I inversion, which involved the loss of a single residue (below). Filter hybridization analysis indicated that the re-arrangements in NOTT 140 and 142 were simple reciprocal translocations and they were not characterized further. Chromosome 1 in CBS 356 contained all of the chromosome II sequences used in the hybridization analysis as well as both of the distal sequences from chromosome I. Chromosome 2 of CBS 356 corresponds to chromosome III of the laboratory strain and chromosome 3 to a deleted derivative of chromosome I. We have not carried out any further analysis of this strain. Micro-array analysis of the chromosomes of NOTT 138 show that a 1.7Mb block of sequence from chromosome II has been transposed onto chromosome I to generate a derivative of chromosomes I and II corresponding to chromosome 1 and 3 of NOTT 138. Chromosome 1 of NOTT 140 contains sequences from the centromere proximal regions of chromosome I, distal I R and distal II L while NOTT 140 chromosome 2 contains sequences from the proximal regions of chromosome II, distal II R. and distal I L This result suggests a exchange of material that is normally present on the distal left arms of chromosomes I and II of the laboratory strain giving rise to a derived II that is about 600kb smaller than chromosome II of the laboratory strain and a derived I that is larger than laboratory strain chromosome I by a similar amount. NOTT 140 contains the ancestral pericentric inversion of chromosome I and so the I R sequences are now on the left arm of the chromosome 1 in this strain.

## 2.2 Sequences of breakpoints in strains NOTT 143 and NOTT 145

### NOTT 143: chromosome 1 breakpoint

```
I: 4642748
ccaaacatcagatcagtaagtggagcatttgccgagtcctaagcactatctcctttctg/
I: 4642687
II: 1445844
/tatatttatttgctactatcgcttttagaacatcatggttattaataatccgtaactagaccgtttaat
II: 1445910
```

### NOTT 143: chromosome 2 breakpoint

```
II: 1445778
cctgtgcatgatttacttttttaaattcagggttaattaactttccatcatttcctcctctcat/
II: 1445844 / I: 4642686
/accatccacatgattagagtcaaacaaaacagttttttttcgggtctccgatgtncttgaancgagga
caaga
I: 4642617
```

Region of homology highlighted

Disruption of SPAC30C2.07-1 (842 amino acids in CRUK 972) by the introduction of premature stop codon

I-4,642,495

atgcttcattttttatttcattcaggatcttcatcaaataaaaac**tc**atcgccgaaagaatcctatga  
**gcttctt**

M L H F L F H S G S S S N R N **S S P K E S Y E**  
**L L**

**catggtttggacaaa**caatatcaaagtactaaggatgtaacgtttcgtcttgtcctcgttcaagacat  
cggagac

**H G L D K** Q Y Q S T K D V T F R L V L V Q D I  
G D

I: 4642686 / II: 1445844

cgaaaaaaaaactgttttggttgactctaatacatgtggatggt/atggagaggaggaaatga 210

R K K T V L F D S N H V D G M E R R K \* 69 amino  
acids

## NOTT 145: chromosome 3 breakpoint

II:2336713

ctaaaattcgccattcaaataacttgggacatcctttacccttaggggtacgaaggataatcatggggcc  
atctggggttgatttcttctctgttaacacgagcgcgatggtggatgtcatgaatgcggtcaacggcc  
caatccata/

II: 2336858 / I: 823412

/taattacgtggagctaccttaaattcaattaggtagtttaaaatctatcccagaaagctaacttact  
gagaagtcctcgcctaaaccatattagcgcgatgtagcatttaataatgaattattcgtgtggatattagata  
actgatttaggttgattttttagcttatacaattncctttttctttttgggtataataaagccaaaat  
cgtaaacaaagatgaattggaataaacattctttcacaataacttccacgagttcancatcgccatgtg  
cgaacctcgttataatctttgaccntcgaatcttgnagtcctgtcc

I: 823099

Potential new ATG indicated giving a C terminal product of  
SPBC24C6.09C-1

1596 nt; 532 amino acids truncation of CRUK 972 protein

## Common chromosome I inversion (2,227,883 bp) breakpoints:

Left breakpoint

I: 2683567

tgttttcaaaatataaccacgggtaagtaatacagttggcatacaacatttgggtaacc

tocata / I:2683632 / I: 4911514

gcaagctagatctagattaatgctataggcatacnaaac

I: 4911476

Right breakpoint: underlined residue lost

I: 2684324

Agatcttagcaaggtttcggatgatgcatgggtaaagttcgatngctttgtgcatctccgtagcagc  
tgcataagcgcgagatccaacgatgatcatctcgattcgttttgtgtgttcatgaaaccacgccttg  
cgtatgaagttgccactttgtatgacaatgagataatcttactgcaataaggccatataaccgta  
attgggtgggnacnaccactcacattccaaagtccaactcaatagtgaagaaattcatcattggcaaca  
agtcatacaacttcggtgctggtggacccttctaccaaactcctttattgacaactttgaacggct  
tcggctgcnttcccagccctgtaacgcctatctttcatgtggctcggaatgtaaaccagaaactcag  
acaaataaccgctggtgatcgcgctgatgatattggttatcgaggctgtgttcatttttcttagtcat  
tttagcgtaacgaaactgacaccgaaaaatatcaagcaatcaagaagatccatctgtccaagcacaac  
cacatctttgctcgataatcaaacttggattaccgatagttaaaggtgaaggatcgggttttgcgtggt  
tcattcgattttccaaacatcgtcgattcagtagactggggttgagtcagatccaagccattcttgc  
gctcaattgataat/t / I: 2683632 / I: 4911515

gtcatataacgaccagatttactcttgaccgacttcatagcagcataattagcctntntccnnngncata  
aaagaaaaaattttgctatctccactctcacaaggttagcgaaggtttgtgcatcttgacagcagggtg  
gttaaattcgttaagcttccaagagatataaatatagtggtcgaatttgacttatccagtcagtc  
tcattgctgaagttggtgggttgccag I: 4911745

### 3 Quantifying natural trait variation in *S. pombe*;

Strains were stored in 20% glycerol at -80° C. Strains were subjected to high throughput phenotyping by micro-cultivation (n=2) in an array of environments essentially as described (PMID: 12489126, PMID:18721464). First, strains were inoculated in 350 µl of YES medium (5% yeast extract, 3% glucose, 225mg/L histidine, 225mg/L adenine, 225mg/L leucine and 225mg/L uracil) and incubated in two serial rounds of pre-cultivation for 48h-72 h at 30C°. For experimental runs, strains were inoculated to an OD of 0.05 - 0.1 in 350 µl of YES medium (3% glucose was replaced by 3% of alternative carbon sources where indicated) in the relevant environments and micro-cultivated for 48 or 72h in a Bioscreen analyzer C (Growth curve Oy, Finland). Environments were: 4-nitroquinolone (0.3µg/ml), AlCl<sub>3</sub> (0.2mg/ml), arabinose (3%; carbon source), Arsenite (0.2, 2mM) BaCl<sub>2</sub> (25mM), Caffeine (1.5mg/ml), CdCl<sub>2</sub> (25µM), Cisplatin (100µg/ml), CoCl<sub>2</sub> (0.25mM), CsCl (12.5mg/ml), CuCl<sub>2</sub> (5mM), Cycloheximide (0.05 µg/ml), Diamide (1.4mM), EMS (0.3%), Ethanol (3%; carbon source), Galactose (3%; carbon source), Glycerol (3%, carbon source), Heat (37, 40°C), HqCl<sub>2</sub> (7.5 15µM), Hydroxyurea (8mg/ml), KCl (1.45 M), LiCl (225mM), Maltose (3%; carbon source), Melibiose (3%; carbon source), MgCl<sub>2</sub> (1.25mM), MMS (0.0015%), MnCl<sub>2</sub> (0.1mM), NaCl (0.05, 0.1, 0.4 M), NiCl<sub>2</sub> (0.75mM), Paraquat (200µg/ml), Pb(NO<sub>3</sub>)<sub>2</sub> 0.4mM, Selenite (0.1mM), SrCl<sub>2</sub> (25mg/ml), Sucrose (3%; carbon source), Tellurite (30.5mM) and Tunicamycin (1µg/ml). All incubations were at 30°C (±0.1°C), except for when heat stress was applied (see above). Pre-heating time was set to ten minutes. Plates were subjected to shaking at highest shaking intensity with 60s of shaking every other minute. Optical density (OD) was recorded using a wide band (450-580 nm) filter every 20 minutes. Strains were run in duplicates on separate plates and normalized to four replicates of the *S. cerevisiae* universal type strain BY4741 in randomised (once) positions on each plate. The plate layout was kept unchanged between duplicates and runs. Runs affected by systematic technical problems were discarded as were isolates severely affected by flocculation (four isolates).

**Data analysis:** Optical density measurements (OD) were calibrated in the following way:

- i) Background correction was achieved by subtracting the SD medium background of 0.067.
- ii) Non-linearity of optical density and population density at higher population densities was compensated for by calibration of each OD measurement as: calibrated OD = OD + 0.8324\*OD<sup>3</sup> (PMID: 14676322, PMID: 12489126)
- iii) Noise reduction was achieved by a moving average smoothing: each OD measurement,  $X_{i,smoothed} = (X_{i-1} + X_i + X_{i+1})/3$ .
- iv) Confounding effects from stationary phase proliferation curve collapses was compensated for by removing all negative slopes (if  $X_{i+1} < X_i$  then set  $X_{i+1} = X_i$ ).

From calibrated proliferation curves, each fitness variable was calculated as:

Proliferation lag: Growth measurements were LN transformed, slopes were calculated between every pair of measurements spaced 140min apart, intercepts between each calculated slope and the extended horizontal line given by the start OD (average of initial five measurements) were calculated and the mean of the two highest intercepts was taken as the length of the lag phase. Proliferation lags longer than 48h were set to 48h.

Proliferation rate: Growth measurements were LN transformed. Slopes were calculated between every pair of measurements spaced 40min apart along the curve (no slopes were calculated from the eight initial time points to filter for digitalisation effects), the top two slopes were discarded to exclude possible artefacts and a mean was calculated from the third to the eight highest slopes. Population doubling time was calculated as LN(2) divided by the mean. Population doubling times longer than 48h were set to 48h.

Proliferation efficiency: The difference between end OD (last measurement) and initial OD (average of initial five measurements) was calculated and taken at face value as a measure of total change in population density. No proliferation efficiency was calculated from growth curves for which no stationary phase was reached, defined as curves with a coefficient of variation over the last five measurements >2%. Proliferation efficiency lower than 0.05 OD units were set to 0.05 OD units.

The calculated fitness variables were transferred onto log scale (LN<sub>2</sub>). To normalize fitness variables across plates, runs and instruments, each fitness variable was related to the corresponding measure from four reference strains (BY4741) included on the same plate. Relative fitness measures for each strain and trait, LSC<sub>ij</sub>, were calculated as:

$$LSC_{ij} = \frac{\sum_{r=1}^2 \left[ \frac{1}{10} \sum_{k=1}^{10} \log(wt_{kj}^r) \right] - \log(x_{ij}^r)}{2}$$

where  $wt_{kj}$  is the fitness variable of the k:th measurement of the wildtype for trait  $j$ ,  $x_{ij}$  is the measure of strain  $i$  for trait  $j$  and  $r$  indicates the run. The LSC for proliferation efficiency was inverted in order to maintain directionality between fitness variables.

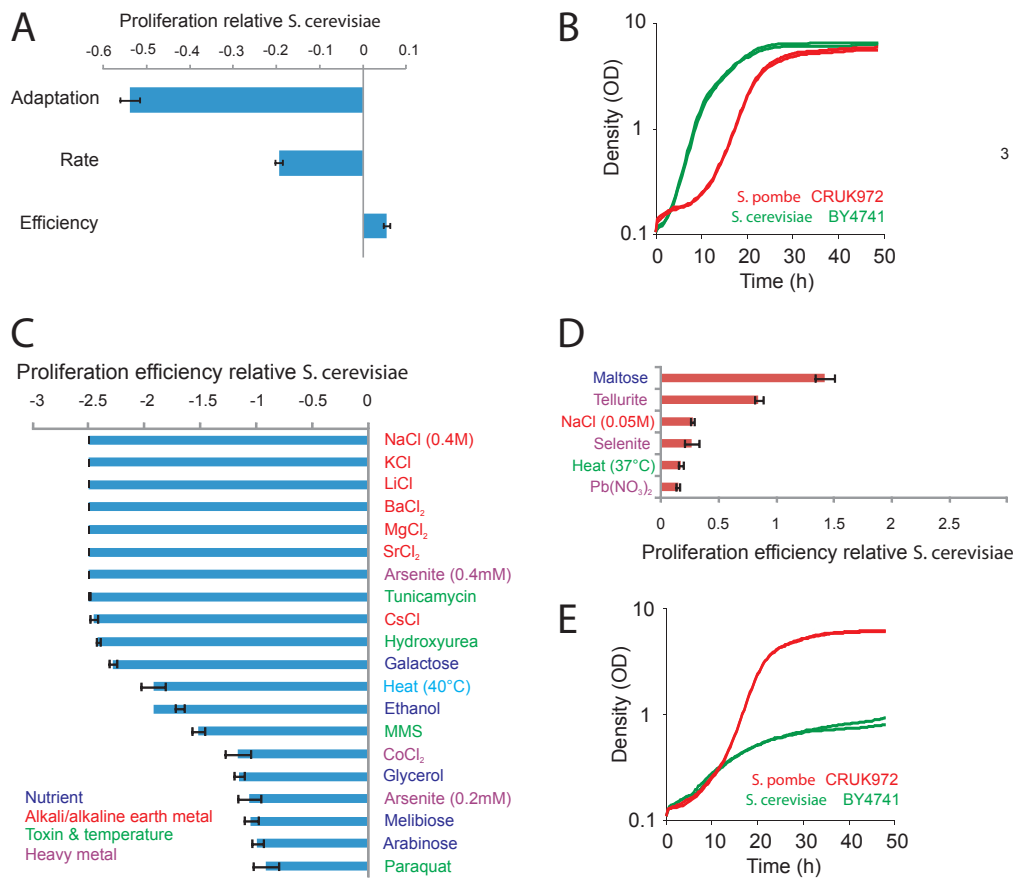

**Figure S1** *S. pombe* proliferates more slowly than *S. cerevisiae* in a wide range of environments. A-B) *S. pombe* shows a much longer mitotic lag phase and a slower rate of mitotic proliferation than the *S. cerevisiae* universal type strain BY4741 in basal conditions (Synthetic Defined medium). A) The proliferative lag, rate and efficiency of *S. pombe* natural isolates in basal conditions were calculated and put in relation to the corresponding measures of BY4741 ( $\text{Log}_2$  [isolate/BY4741]). Mean and Standard Error of the Mean are displayed. B) Proliferation of the *S. pombe* type strain 972h- (N=2) in basal conditions. BY4741 (N=2) is shown as reference. C) Top 20 environments in which the *S. pombe* proliferative efficiency is inferior to that of the *S. cerevisiae* universal type strain BY4741. A relative proliferative efficiency, ( $\text{Log}_2$  [isolate/BY4741]), was calculated for all *S. pombe* natural isolates. Means and Standard Error of the Means for each environment are displayed. D) Top 5 environments in which the *S. pombe* proliferative efficiency is superior to that of the *S. cerevisiae* universal type strain BY4741. A relative proliferative efficiency, ( $\text{Log}_2$  [isolate/BY4741]), was calculated for all *S. pombe* natural isolates. Mean and Standard Error of the Mean for each environment are displayed. E) Proliferation of the *S. pombe* type strain 972h- (N=2) using maltose as sole carbon source. BY4741 (N=2) is shown as reference.

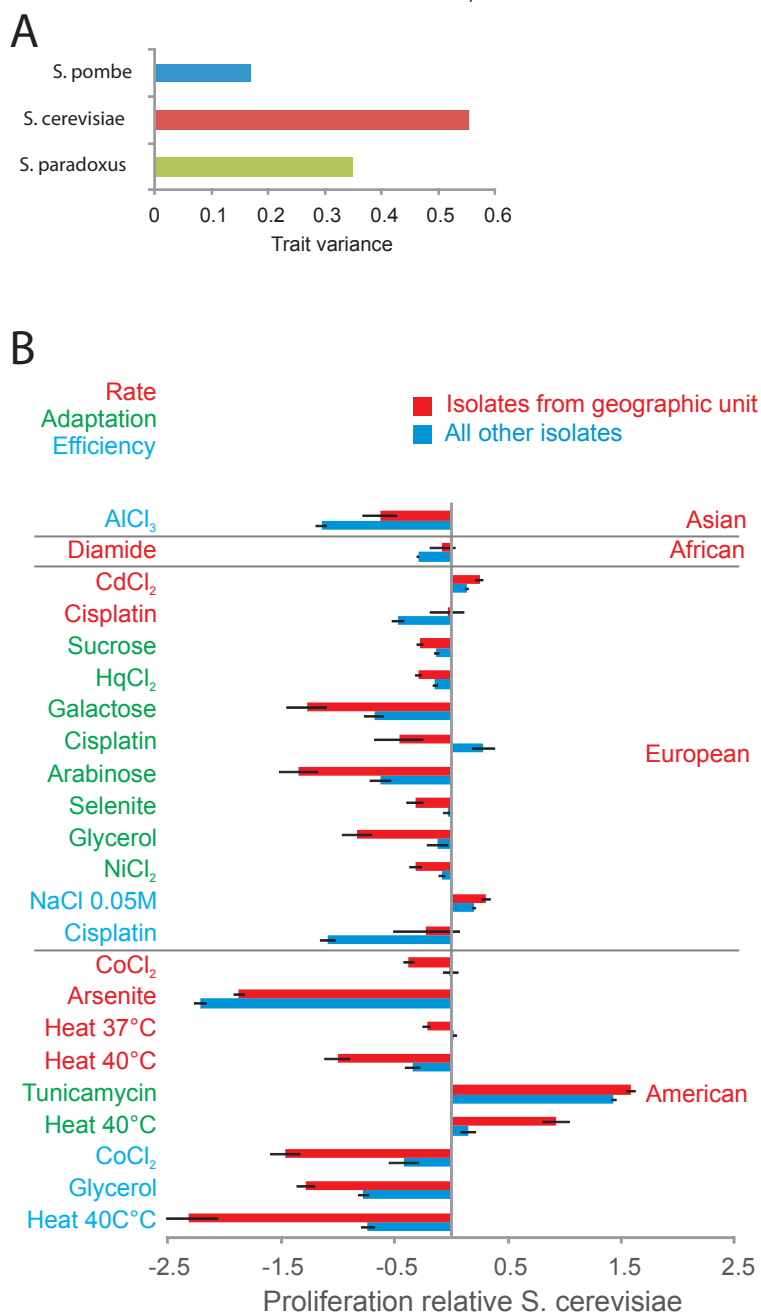

**Figure S2** Natural trait variation in *S. pombe* is defined by geographic boundaries. A) Trait variation in natural isolates *S. pombe* is substantially smaller than trait variation in *S. cerevisiae* and *S. paradoxus*. Trait variance within *S. pombe* was calculated for each trait separately and a mean over all traits was formed, excluding environments in which more than 50% of *S. pombe* isolates failed to proliferate. Trait variance in *S. cerevisiae* and *S. paradoxus* was obtained from (ref) in which the mitotic proliferation in a similar, but wider array of environments was quantified using an identical experimental set-up. Error bars represent standard errors of the mean. B) Traits for which *S. pombe* isolates from one geographic area differ significantly (Students ttest, FDR=5%) from all other *S. pombe* isolates. Means and Standard Error of the Means are displayed.



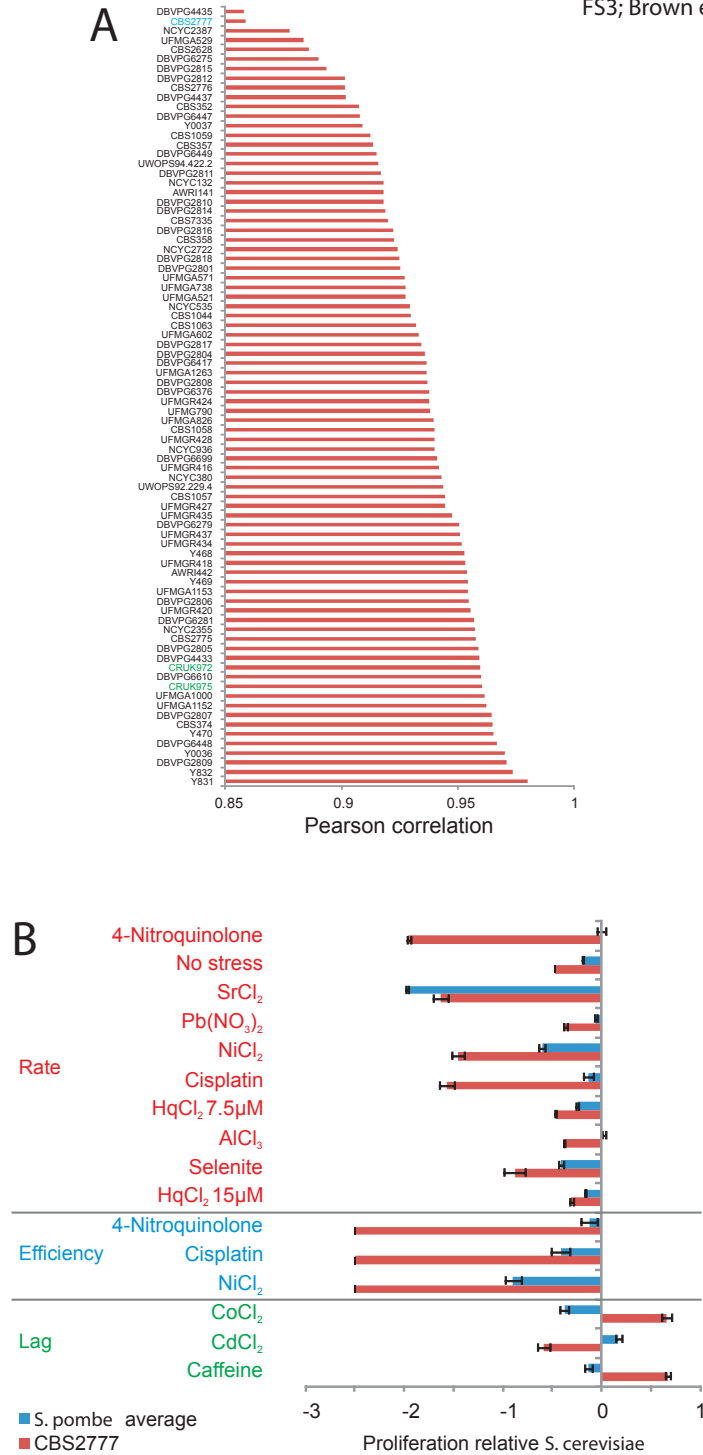

**Figure S3** The *S. pombe* karyotype extreme, CBS2777, shows abnormal proliferation patterns. A) *S. pombe* mean trait profile was calculated over all traits and the similarity (Pearson correlation) between the mean trait profile and the trait profile of each individual *S. pombe* isolate was calculated. Isolates were ranked according to degree of similarity. The *S. pombe* karyotype extreme CBS2777 (blue) and the universal reference strains 972h- and 975h+ (green) are indicated with color. B) Traits for which the *S. pombe* karyotype extreme CBS2777 (N=2) differ significantly (Students ttest, FDR=5%) from all other *S. pombe* isolates. Means and Standard Error of the Means are displayed.

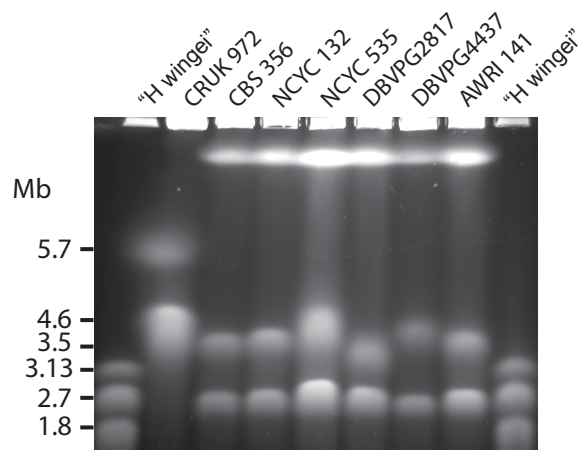

**Figure S4** A karyotype re-arrangement shared between the *S. pombe* type strain CBS 356 and five other strains. DNA was extracted from the *S. pombe* laboratory strain CRUK 972 , the type strain, CBS 356 and five other strains, NCYC 132, NCYC535, DBVPG2817, DBVPG4437 and AWRI 141 and analysed by pulsed field gel electrophoresis and ethidium bromide staining. The markers used in the flanking tracks were obtained from Bio-Rad and marketed as chromosomal DNA derived from *Hansenula wingei*. However we have prepared chromosomal DNA from the *Hansenula wingei* type strain and do not observe the same pattern, thus the label is in parentheses. The variability of the chromosome 2 is characteristic of the presence of the rDNA.

FS5; identification of the sites of re-arrangement in NOTT13 and NOTT145

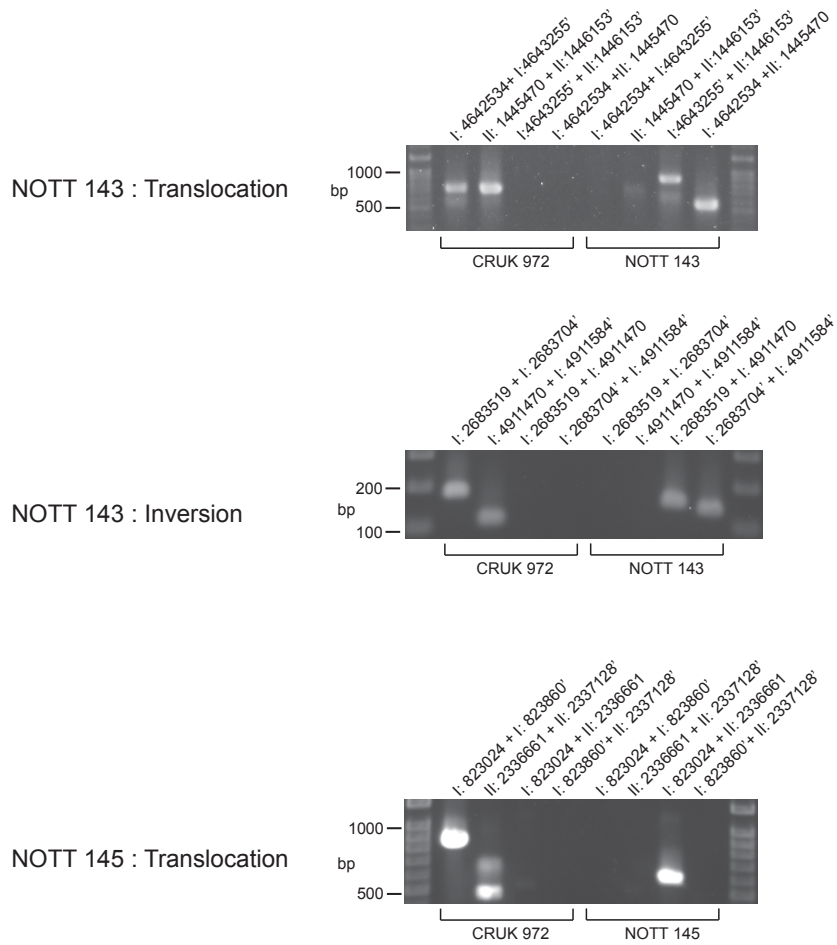

**Figure S5** Identification of the sites of re-arrangements in NOTT 143 and NOTT 145. DNA was analysed by PCR using the indicated primers for the three re-arrangements identified in the CGH analysis of strains NOTT 143 and NOTT 145. CRUK 972 DNA was used as the control. The numbers refer to the positions of the 5' residue of the respective primers on the assembly of the laboratory strain. The ' indicates that the primer corresponds to the complementary strand of the laboratory strain assembly.

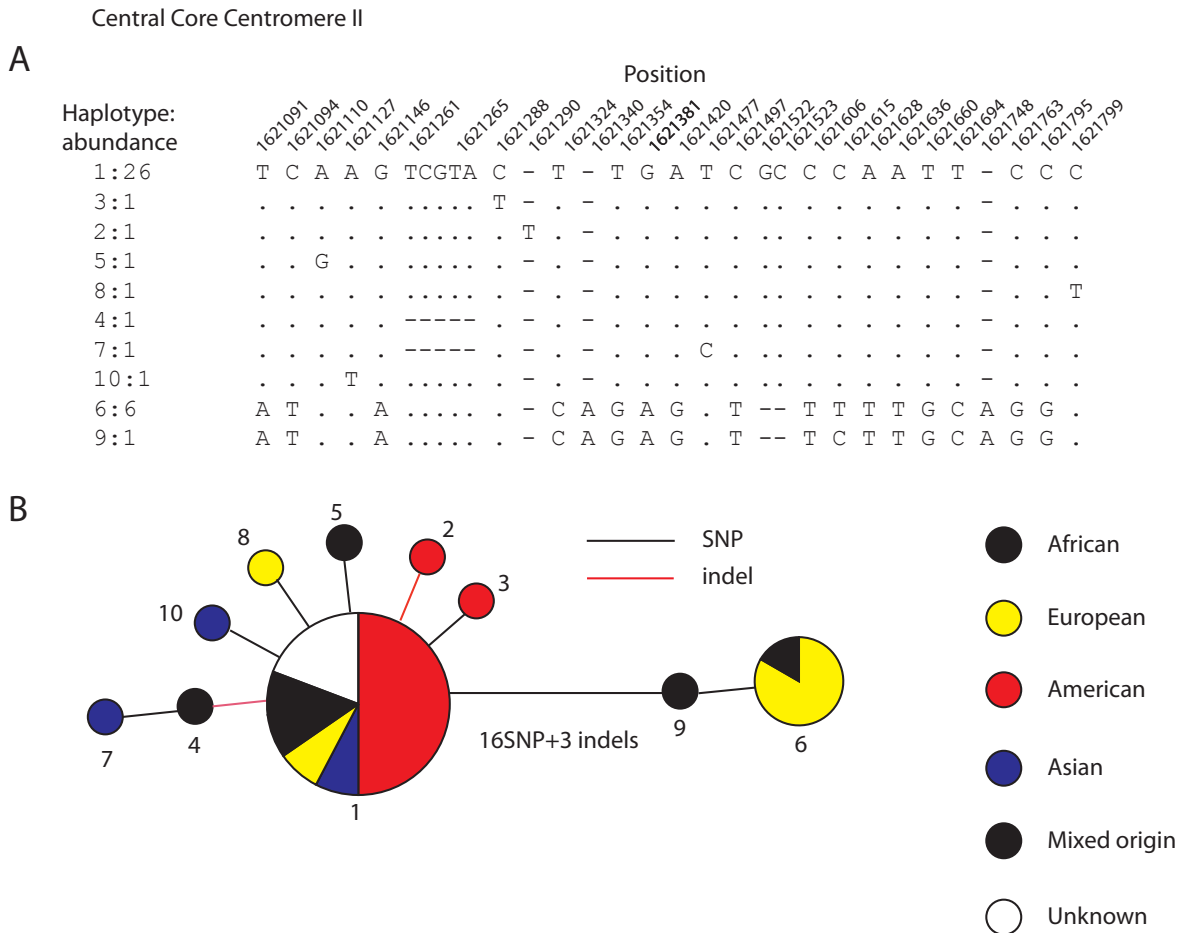

**Figure S6** SNPs and haplotype structure in the central core of *S. pombe* chromosome II. A, The sequences shown in the text were analysed using the FABbox suite to identify informative residues B. The sequences shown in A were analysed for their relatedness using Network (Version 4.6.0.0, Fluxus Technology <http://www.fluxus-engineering.com/sharenet.htm>) to produce the network of haplotype relationships based on a median joining network using default parameters. The numbers adjacent to the nodes in the network refer to the specific central core haplotypes listed in A. The areas of the individual nodes are proportional to the numbers of compound haplotypes that contain the particular central core haplotype. The colors refer to the geographical origins of the respective haplotypes as indicated. Also detailed are the numbers and types of mutation separating the respective nodes.

CEN2 L; 659bp

Haplotype:

abundance

|      |         |
|------|---------|
| 1:17 | G C A C |
| 2:19 | A . . . |
| 3:1  | A T . . |
| 4:2  | A . . G |
| 5:1  | A . G . |

**1572349**  
**1572524**  
**1572778**  
**1572987**

CEN2 R; 719bp

Haplotype:

abundance

|      |           |
|------|-----------|
| 1:23 | T T A G A |
| 2:3  | . . C . . |
| 3:4  | . C . . . |
| 4:1  | C . . . . |
| 5:1  | . C . . T |
| 6:7  | . C . A . |
| 7:1  | C C . . . |

**1658038**  
**1658392**  
**1658425**  
**1658455**  
**1658566**

CEN2 compound haplotypes

Haplotype:

abundance

|      |         |
|------|---------|
| 1:17 | G T T G |
| 2:6  | A T C G |
| 3:10 | A T T G |
| 4:7  | A A C A |

**1572349**  
**1621091**  
**1658392**  
**1658455**

**Figure S7** SNPs flanking the centromere and informative SNPs used in four gamete test. The figure illustrates the positions of the SNPs identified in the sequences flanking the centromere of chromosome II. Informative SNPs are shown in bold. The four compound haplotypes composed of informative SNPs are indicated below.

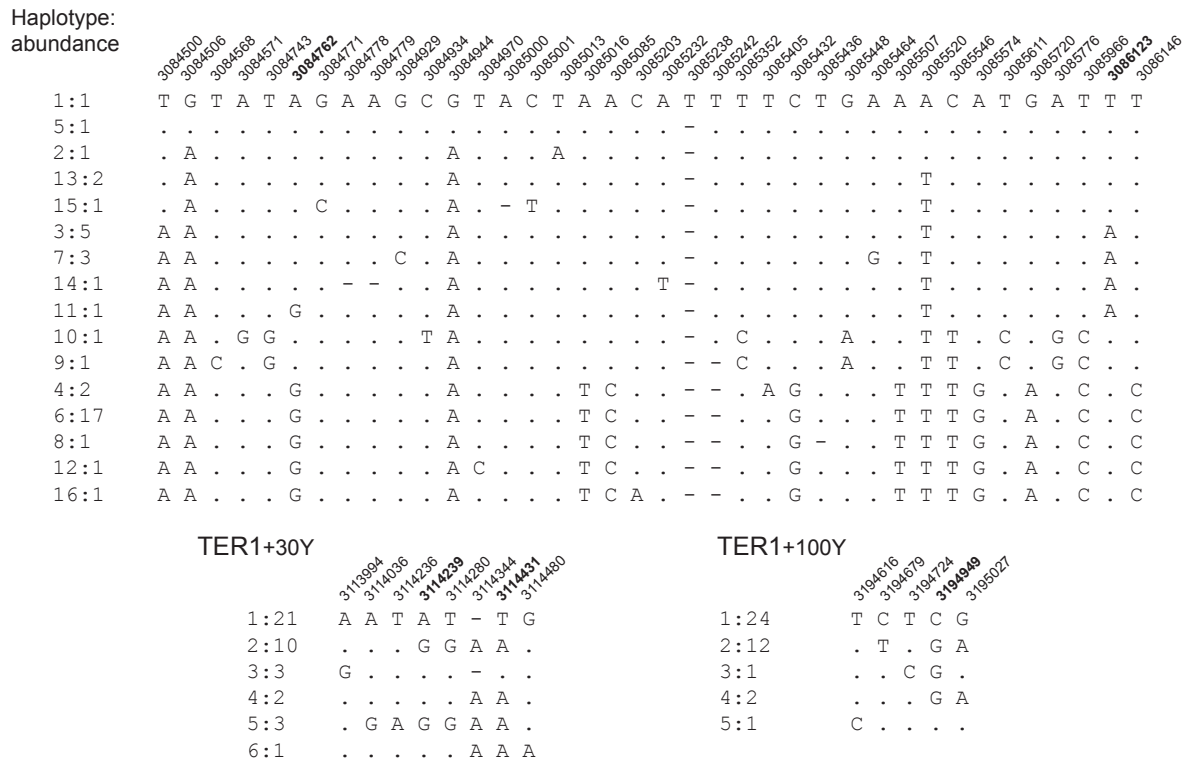

**Figure S8** SNPs identified in the TER1 gene and in adjacent sequences. The figure illustrates the positions of the SNPs identified in the TER1 gene and the two adjacent sequences studied. Informative SNPs used in the linkage disequilibrium (Table 4) measurements are shown in bold.

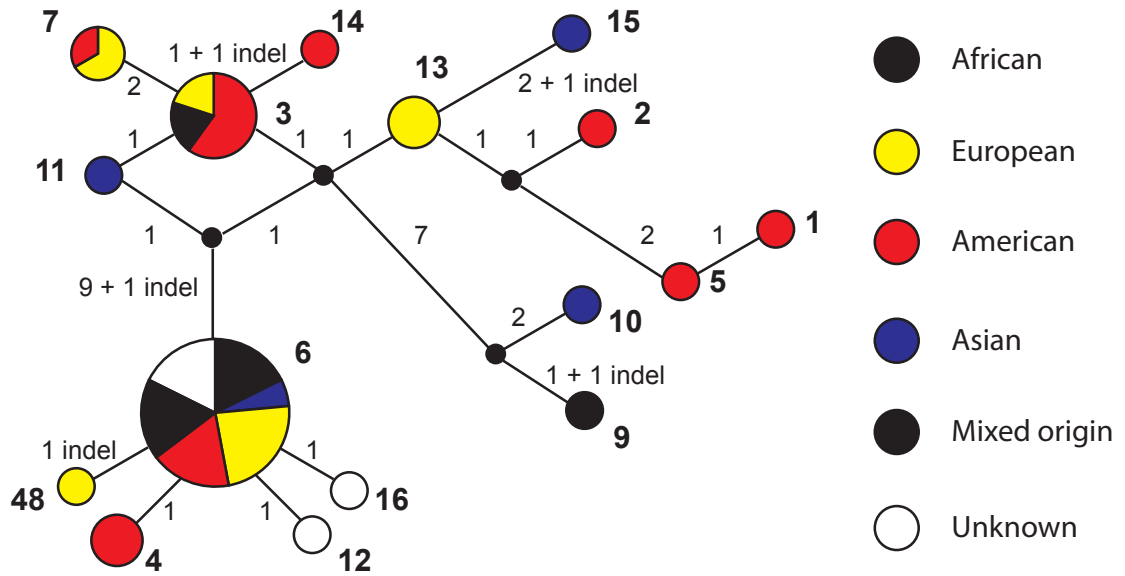

**Figure S9** Network of haplotypes at the TER gene. The sequences shown in figure S8 were analysed as in Figure S6. The numbers in bold refer to the haplotypes indicated in S8. The areas of the individual nodes are proportional to the numbers of compound haplotypes that contain the particular haplotype. The numbers between adjacent to the branches refer to the number of SNPs or indels separating the respective nodes. The colors refer to the geographical origins of the respective haplotypes as indicated.

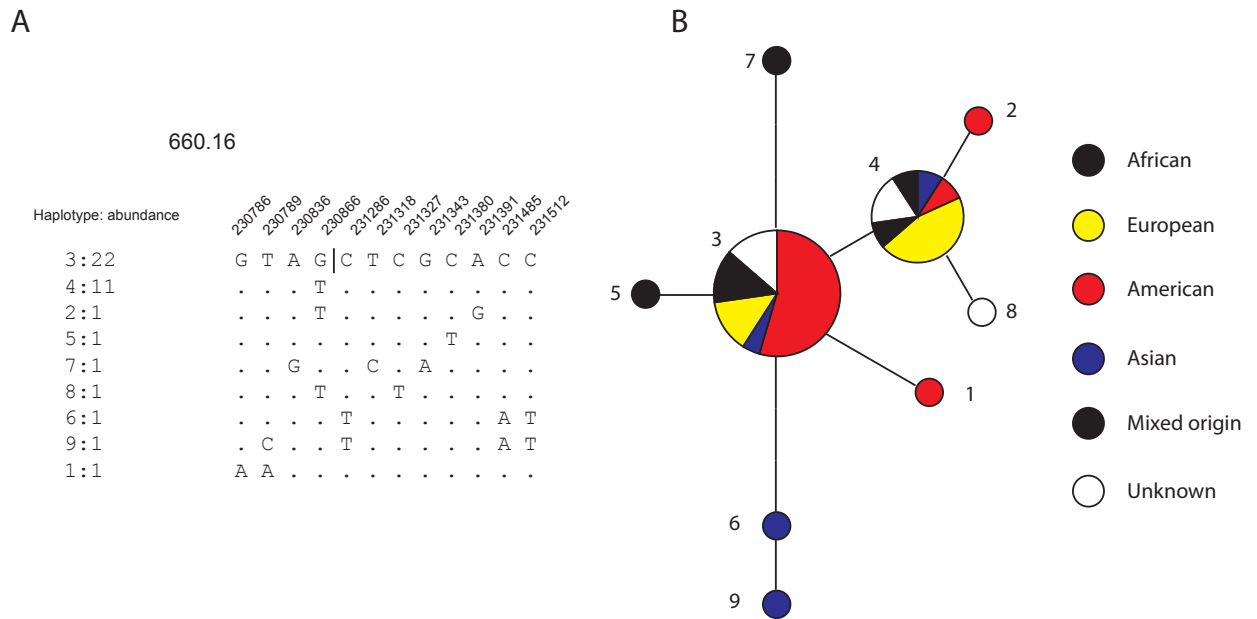

**Figure S10** SNPs identified in intron 3 of the SPBC660.16 gene. **A.** The figure illustrates the positions of the SNPs identified in the third intron of the SPBC660.16 gene. **B.** The sequences shown in A were analysed as in Figure S6. The numbers refer to the haplotypes indicated in A. The areas of the individual nodes are proportional to the numbers of compound haplotypes that contain the particular haplotype. The colors refer to the geographical origins of the respective haplotypes as indicated. The numbers of mutation separating the respective nodes are proportional to the distances between them.



**Table S1 Strains used in this study**

| Strain number                                                   | Source-Collection | Date of isolation | Source                                                | Location isolated        |
|-----------------------------------------------------------------|-------------------|-------------------|-------------------------------------------------------|--------------------------|
| UWOPS 92.229.4                                                  | MA Lachance UWOPS | unknown to us     | Tequilla                                              | Mexico, Jalisco          |
| UWOPS 94.422.2                                                  | MA Lachance UWOPS | unknown to us     | Tequilla                                              | Mexico, Jalisco          |
| UFMG 790=CBS10459                                               | Carlos Rosa UFMG  | 1996              | Must of Brazilian cachaça;<br>Frozen pulp of Eugenia  | Brazil:Vicosá            |
| UFMG R435=CBS10458                                              | Carlos Rosa UFMG  | 1999              | uniflora;                                             | Brazil: Aracaju          |
| UFMG A1263=CBS10469                                             | Carlos Rosa UFMG  | 1996              | Must of Brazilian cachaça;                            | Brazil:Vicosá            |
| UFMG A602=CBS10460                                              | Carlos Rosa UFMG  | 1996              | Must of Brazilian cachaça;<br>Frozen pulp of Eugenia  | Brazil: Belo Horizonte   |
| UFMG R420=CBS10472                                              | Carlos Rosa UFMG  | 1996              | uniflora                                              | Brazil; Aracaju          |
| UFMG A1153=CBS10468                                             | Carlos Rosa UFMG  | 1996              | Must of Brazilian cachaça;<br>Frozen pulp of Eugenia  | Brazil: Salinas          |
| UFMG R434=CBS10476                                              | Carlos Rosa UFMG  | 1999              | uniflora                                              | Brazil: Aracaju          |
| UFMG A826=CBS10465                                              | Carlos Rosa UFMG  | 1996              | Must of Brazilian cachaça;<br>Frozen pulp of Eugenia  | Brazil: Belo Horizonte   |
| UFMG R416=CBS10470                                              | Carlos Rosa UFMG  | 1999              | uniflora<br>Frozen pulp of Eugenia                    | Brazil: Aracaju          |
| UFMG R428=CBS10475                                              | Carlos Rosa UFMG  | 1999              | uniflora                                              | Brazil: Aracaju          |
| UFMG A1152=CBS10467                                             | Carlos Rosa UFMG  | 1996              | Must of Brazilian cachaça;<br>Frozen pulp of Eugenia  | Brazil: Salinas          |
| UFMG R424=CBS10473                                              | Carlos Rosa UFMG  | 1999              | uniflora                                              | Brazil: Aracaju          |
| UFMG A571=CBS10463                                              | Carlos Rosa UFMG  | 1996              | Must of Brazilian cachaça;                            | Brazil: Belo Horizonte   |
| UFMG A529=CBS10462                                              | Carlos Rosa UFMG  | 1996              | Must of Brazilian cachaça;                            | Brazil: Belo Horizonte   |
| UFMG A1000=CBS10465                                             | Carlos Rosa UFMG  | 1996              | Must of Brazilian cachaça;<br>Frozen pulp of Eugenia  | Brazil: Belo Horizonte   |
| UFMG R427=CBS10474                                              | Carlos Rosa UFMG  | 1999              | uniflora<br>Frozen pulp of Eugenia                    | Brazil: Aracaju          |
| UFMG R437=CBS10477                                              | Carlos Rosa UFMG  | 1999              | uniflora<br>Frozen pulp of Eugenia                    | Brazil: Aracaju          |
| UFMG R418=CBS10471                                              | Carlos Rosa UFMG  | 1999              | uniflora                                              | Brazil: Aracaju          |
| UFMG A521=CBS10461                                              | Carlos Rosa UFMG  | 1996              | Must of Brazilian cachaça;                            | Brazil: Belo Horizonte   |
| UFMG A738=CBS10464                                              | Carlos Rosa UFMG  | 1996              | Must of Brazilian cachaça;                            | Brazil: Belo Horizonte   |
| NCYC 2387=DBVPG 6275 =<br>CBS5557 (T of Schiz.<br>malidevorans) | Steve James NCYC  | 11/11/1985        | Listan grapes                                         | Spain                    |
| NCYC 2355-1*                                                    | Steve James NCYC  | 1991              | Steve James NCYC                                      | Japan                    |
| CBS 356 =DBVPG6277 (T of Schiz.<br>pombe var. pombe)            | Steve James NCYC  | 1922              | Arak (aniseed-flavoured<br>distilled alcoholic drink) | Eastern<br>mediterranean |

|                                                  |                          |               |                              |               |
|--------------------------------------------------|--------------------------|---------------|------------------------------|---------------|
| NCYC 380= CBS 10392                              | Steve James NCYC         | 1953          | Raw cane sugar               | Unknown       |
| NCYC 132= CBS 10391                              | Steve James NCYC         | 1921          | Millet Beer                  |               |
| NCYC 936= CBS 10394                              | Steve James NCYC         | 1979          | Toddy (Palm wine)            | Sri Lanka     |
| NCYC 683 = CBS 10393                             | Steve James NCYC         | 1966          | Fermenting apple juice       | Unknown       |
| DBVPG6699-1*                                     | Gianni Litti             | 01/04/1990    | Lychee fruit                 | Indochina     |
| Y0036                                            | Neil Jolly ARC Infruitec | unknown to us | Wine                         | South Africa  |
| Y0037                                            | Neil Jolly ARC Infruitec | unknown to us | Wine                         | South Africa  |
| CBS2628                                          | Steve James NCYC         | 1952          | Palm wine                    | Pakistan      |
| CBS2775                                          | Steve James NCYC         | 1957          | Fermenting molasses          | Japan         |
| CBS5680=DBVPG6448                                | Steve James NCYC         | 1965          | Apple                        | Poland        |
| CBS5682=DBVPG6376                                | Steve James NCYC         | 1965          | Bantu beer                   | South Africa  |
| CBS7335                                          | Steve James NCYC         | 1988          | Alpechín                     | Spain         |
| NCYC535 = CBS 4100                               | Steve James NCYC         | 1959          | Unknown                      | Unknown       |
| DBVPG2801                                        | Steve James NCYC         | 1939          | Lagby (drink from date Palm) | Tunisia       |
| DBVPG2804                                        | Steve James NCYC         | 1963          | Wine                         | Malta         |
| DBVPG2805                                        | Steve James NCYC         | 1963          | Wine                         | Malta         |
| DBVPG2806                                        | Steve James NCYC         | 1963          | Wine                         | Malta         |
| DBVPG2807                                        | Steve James NCYC         | 1963          | Grape must treated with SO2  | Malta         |
| DBVPG2808                                        | Steve James NCYC         | 1963          | Grape must treated with SO2  | Malta         |
| DBVPG2809                                        | Steve James NCYC         | 1963          | Grape must treated with SO2  | Malta         |
| DBVPG2810                                        | Steve James NCYC         | 1963          | Wine                         | Malta         |
| DBVPG2811                                        | Steve James NCYC         | 1966          | Grape must treated with SO2  | Sicily, Italy |
| DBVPG2812                                        | Steve James NCYC         | 1966          | Grape must treated with SO2  | Sicily, Italy |
| DBVPG2814                                        | Steve James NCYC         | 1966          | Grape must treated with SO2  | Sicily, Italy |
| DBVPG2815                                        | Steve James NCYC         | 1966          | Grape must treated with SO2  | Sicily, Italy |
| DBVPG2816                                        | Steve James NCYC         | 1966          | Grape must treated with SO2  | Sicily, Italy |
| DBVPG2817                                        | Steve James NCYC         | 1966          | Grape must treated with SO2  | Sicily, Italy |
| DBVPG2818                                        | Steve James NCYC         | 1966          | Grape must treated with SO2  | Sicily, Italy |
| DBVPG4433*                                       | Steve James NCYC         | 12/04/1996    | Unknown                      | Germany       |
| DBVPG4435                                        | Steve James NCYC         | 12/04/1996    | Unknown                      | Italy         |
| DBVPG4437                                        | Steve James NCYC         | 12/04/1996    | Unknown                      | Italy         |
| DBVPG6610                                        | Steve James NCYC         | 08/08/1986    | Lab strain lys1              | Unknown       |
| Y468                                             | Gert Marais CAMS         | unknown to us | Cape wines                   | South Africa  |
| Y469                                             | Gert Marais CAMS         | unknown to us | Unknown                      | Unknown       |
| Y470                                             | Gert Marais CAMS         | unknown to us | Unknown                      | Unknown       |
| Y831                                             | Gert Marais CAMS         | unknown to us | Industrial glucose;          | South Africa  |
| Y832                                             | Gert Marais CAMS         | unknown to us | Industrial glucose:          | South Africa  |
| CBS374 = DBVPG6418                               | Gert Marais CAMS         | 1928          | Molasses                     | Delft         |
| 972                                              | Jacky Hayles CRUK        | 1947          | Rotten wine                  | France        |
| 975                                              | Jacky Hayles CRUK        | 1947          | Rotten wine                  | France        |
| DBVPG 6275 = CBS5557 (T of Sciz<br>maledivorans) | Steve James NCYC         | 11/11/1985    | Listan grapes                | Spain         |

|                                               |                    |               |                        |                     |
|-----------------------------------------------|--------------------|---------------|------------------------|---------------------|
| DBVPG6279= CBS1042 (T of Schiz. liquefaciens) | Steve James NCYC   | 11/11/1985    | Sulfited grape juice   | Unknown             |
| DBVPG6281=CBS1061                             | Steve James NCYC   | 11/11/1985    | Cane-sugar molasses    | Unknown             |
| DBVPG6417=CBS355                              | Steve James NCYC   | 10/16/1987    | Cane-sugar molasses    | Unknown             |
| DBVPG6447=CBS1043                             | Steve James NCYC   | 10/31/1987    | Cane-sugar molasses    | Unknown             |
| DBVPG 6449=CBS1062                            | Steve James NCYC   | 10/31/1987    | Cane-sugar molasses    | Unknown             |
| CBS358=DPVPG6374                              | Vincent Robert CBS | 1922          | Unknown                | Unknown             |
| CBS2777                                       | Vincent Robert CBS | 1957          | Fermenting molasses    | Japan               |
| CBS1058                                       | Vincent Robert CBS | 1949          | Molasses               | Java, Indonesia     |
| CBS357=DBVPG6280                              | Vincent Robert CBS | 1912          | Cane-sugar molasses    | Jamaica             |
| CBS2776                                       | Vincent Robert CBS | 1957          | Fermenting molasses    | Japan               |
| CBS 352= DBVPG 6373                           | Vincent Robert CBS | 1923          | Batavian arrak factory | Indonesia           |
| CBS1057= DBVPG6375                            | Vincent Robert CBS | 1933          | Brewer's yeast         | Skane, Sweden       |
| CBS1059                                       | Vincent Robert CBS | 1949          | Cane sugar             | Mauritius           |
| CBS1044                                       | Vincent Robert CBS | 1927          | Cane-sugar molasses    | Unknown             |
| L2470                                         | Giani Litti        | unknown to us | Wine                   | Chile               |
|                                               | Eveline Bartowsky  |               |                        | Eden Valley, South  |
| AWRI141                                       | AWRI               | 25/06/1945    | Vineyard               | Australia           |
|                                               | Eveline Bartowsky  |               |                        | McLaren Vale, South |
| AWRI442                                       | AWRI               | 1951          | Haslegrove Wines       | Australia           |
| CBS1063=DBVPG6450                             | Vincent Robert CBS | 1934          | Cane-sugar molasses    | Unknown             |
| Y468-subclone WRAB NOTT133                    |                    |               |                        |                     |
| Y468-subclone WRAB NOTT134                    |                    |               |                        |                     |
| Y468-subclone WRAB NOTT135                    |                    |               |                        |                     |
| Y468-subclone WRAB NOTT136                    |                    |               |                        |                     |
| Y470-subclone WRAB NOTT137                    |                    |               |                        |                     |
| Y470-subclone WRAB NOTT138                    |                    |               |                        |                     |
| Y470-subclone WRAB NOTT139                    |                    |               |                        |                     |
| Y470-subclone WRAB NOTT140                    |                    |               |                        |                     |
| Y831-subclone WRAB NOTT141                    |                    |               |                        |                     |
| Y831-subclone WRAB NOTT142                    |                    |               |                        |                     |
| Y832-subclone WRAB NOTT143                    |                    |               |                        |                     |
| Y832-subclone WRAB NOTT144                    |                    |               |                        |                     |
| Y832-subclone WRAB NOTT145                    |                    |               |                        |                     |
| Y832-subclone WRAB NOTT146                    |                    |               |                        |                     |
| Y468-subclone WRAB NOTT147                    |                    |               |                        |                     |
| CBS374-subclone WRAB NOTT148                  |                    |               |                        |                     |

---

\* DBVPG 6699 is listed as *Saccharomyces boulardi* however GL found the original isolate to be impure, sub-cloned it and found it to contain a yeast resembling *S. pombe* which we have listed here as DBVPG 6699-1. DBVPG 4433 is listed as *S. pombe* in the DBVPG catalogue which we have confirmed here, however it is also listed as being identical to NCYC 3092 which is listed as *Zygosaccharomyces*. We have not established the source of this discrepancy.

**Table S2 Assorting 84 strains of *S. pombe* into 40 groups with shared haplotypes.**

| Strain                                                                                                                                         | hap. no.  | 660 | TER1 | TER1+30 | TER1+100 | CC2L | CC2R | CCC2 |
|------------------------------------------------------------------------------------------------------------------------------------------------|-----------|-----|------|---------|----------|------|------|------|
| UWOPS 92.229.4                                                                                                                                 | <b>1</b>  | 1   | 1    | 1       | 1        | 1    | 1    | 1    |
| <b>UWOPS 94.422.2</b>                                                                                                                          | <b>2</b>  | 2   | 2    | 2       | 1        | 1    | 1    | 1    |
| UFMG A529, UFMG 790, UFMG A826                                                                                                                 | <b>3</b>  | 3   | 3    | 3       | 1        | 1    | 2    | 1    |
| UFMG R416, UFMG R418, UFMG R420, UFMG R424,<br>UFMG R435                                                                                       | <b>4</b>  | 3   | 4    | 1       | 2        | 1    | 1    | 1    |
| UFMG R427                                                                                                                                      | <b>5</b>  | 3   | 4    | 1       | 2        | 2    | 3    | 3    |
| UFMG A1263                                                                                                                                     | <b>6</b>  | 3   | 5    | 3       | 1        | 1    | 2    | 1    |
| UFMG A521, UFMG A571, UFMG A602                                                                                                                | <b>7</b>  | 3   | 3    | 3       | 1        | 2    | 1    | 1    |
| UFMG A1000, UFMG A1153,                                                                                                                        | <b>8</b>  | 3   | 6    | 1       | 1        | 2    | 1    | 1    |
| UFMG R434                                                                                                                                      | <b>9</b>  | 3   | 6    | 1       | 2        | 3    | 1    | 2    |
| UFMG R428                                                                                                                                      | <b>10</b> | 3   | 7    | 2       | 2        | 2    | 3    | 1    |
| UFMG A1152                                                                                                                                     | <b>11</b> | 3   | 8    | 1       | 1        | 2    | 1    | 1    |
| UFMG R437                                                                                                                                      | <b>12</b> | 3   | 6    | 1       | 2        | 1    | 1    | 1    |
| UFMG A738                                                                                                                                      | <b>13</b> | 3   | 3    | 1       | 1        | 1    | 2    | 1    |
| NCYC 683, NCYC 2387, DBVPG4435, AWRI 442                                                                                                       | <b>14</b> | 4   | 6    | 1       | 1        | 1    | 1    | 1    |
| NCYC 936, NCYC 2355-1,                                                                                                                         | <b>15</b> | 3   | 9    | 4       | 1        | 4    | 4    | 4    |
| <b>CBS 356, NCYC 132, NCYC535, DBVPG2817,<br/>DBVPG4437, AWRI 141</b>                                                                          | <b>16</b> | 5   | 3    | 2       | 1        | 5    | 5    | 5    |
| NCYC 380, CBS 1063, <b>DBVPG 6281</b> , CBS 355,<br><b>DBVPG 6417</b>                                                                          | <b>17</b> | 3   | 6    | 1       | 2        | 2    | 1    | 1    |
| <u>DBVPG4433</u> , <u>DBVPG 6279</u> , <u>DBVPG6610</u> , <u>DBVPG 6699</u> ,<br>Y0036, Y0037, <u>CRUK 972</u> , <u>CRUK 975</u> , Y468, Y469, | <b>18</b> | 4   | 6    | 1       | 2        | 2    | 6    | 6    |
| CBS 2628                                                                                                                                       | <b>19</b> | 6   | 10   | 4       | 3        | 4    | 7    | 7    |
| CBS 2775, CBS 2776, <b>CBS 2777</b>                                                                                                            | <b>20</b> | 3   | 11   | 2       | 1        | 1    | 1    | 1    |
| CBS 5680                                                                                                                                       | <b>21</b> | 4   | 7    | 2       | 2        | 2    | 1    | 1    |
| CBS 5682                                                                                                                                       | <b>22</b> | 7   | 6    | 2       | 1        | 1    | 1    | 1    |
| CBS 7335                                                                                                                                       | <b>23</b> | 8   | 12   | 1       | 4        | 1    | 1    | 1    |
| DBVPG2801                                                                                                                                      | <b>24</b> | 3   | 3    | 1       | 5        | 2    | 3    | 8    |
| <u>DBVPG2805</u>                                                                                                                               | <b>25</b> | 3   | 6    | 1       | 2        | 2    | 6    | 6    |
| DBVPG2804, DBVPG2806, DBVPG2807, DBVPG2808,<br>DBVPG2809                                                                                       | <b>26</b> | 4   | 6    | 1       | 1        | 2    | 6    | 6    |
| DBVPG2810                                                                                                                                      | <b>27</b> | 4   | 13   | 5       | 1        | 2    | 6    | 6    |
| DBVPG2811, DBVPG2812, DBVPG2814, DBVPG2815,<br>DBVPG2816, DBVPG2818                                                                            | <b>28</b> | 4   | 6    | 1       | 4        | 2    | 6    | 6    |
| <b>Y470*</b>                                                                                                                                   | <b>29</b> | 4   | 6    | 5       | 1        | 1    | 6    | 1    |
| <b>Y831*, Y832*</b>                                                                                                                            | <b>30</b> | 3   | 6    | 2       | 1        | 2    | 6    | 9    |
| CBS374                                                                                                                                         | <b>31</b> | 3   | 7    | 2       | 2        | 2    | 6    | 6    |
| DBVPG 6447, DBVPG 6449                                                                                                                         | <b>32</b> | 3   | 6    | 2       | 1        | 2    | 1    | 1    |
| CBS 358                                                                                                                                        | <b>33</b> | 3   | 6    | 1       | 1        | 1    | 1    | 1    |

|          |           |   |    |   |   |   |   |    |
|----------|-----------|---|----|---|---|---|---|----|
| CBS 1058 | <b>34</b> | 4 | 6  | 1 | 1 | 2 | 3 | 10 |
| CBS 357  | <b>35</b> | 3 | 14 | 2 | 1 | 1 | 1 | 1  |
| CBS 352  | <b>36</b> | 9 | 15 | 6 | 1 | 1 | 1 | 1  |
| CBS 1057 | <b>37</b> | 4 | 6  | 1 | 2 | 2 | 1 | 1  |
| CBS 1059 | <b>38</b> | 4 | 6  | 1 | 2 | 1 | 1 | 1  |
| CBS 1044 | <b>39</b> | 3 | 16 | 1 | 1 | 2 | 1 | 1  |
| L2470    | <b>40</b> | 4 | 13 | 5 | 1 | 1 | 1 | 1  |

---

Highlighted in bold are strains that contain translocations detected in the survey. Underlined are strains with the 2.3Mb derived inversion of chromosome I originally identified in CRUK 972. The asterisks indicated strains containing mixtures of karyotypes.

## Sequences of haplotypes shown in table S2.

### 660.16 intron

>1

TAAAGCTACAATGATGTTAGCATATTCACATTCGATATGATACAAATAATGTTAAAAACAAGGAAAGGTTA  
ATGCTCATGAGCCCGGAAAGCAAGCAAAAAATAAAGACAAAATAATCATAAGTGTGAGTGACAGACAAA  
AACAAAGATGAACCGAAAACCTCCCGCGAGAGAATCTGATAACGAAATTTTTTACCCAACAAAACCGGAACGC  
CGTGCCATAACAAGTGAGAAAAACTAGGATTGTTTTTCTTACATGCAAAACTCGGACATTTTTTGATCAGC  
ATGCAAAAAATAGGGCGCGGGTAAAGAAAGAGACAAAAACAAATCGTCGGATAAGTTGATGAGTCATCGTTT  
TCGAGGGTTCGCTCGTTATCATAGACACATCTACGCTATAACAACACAAAAAGCATGGTAAATGGACAAAA  
CCAACACACGCGACTCACCTTACAACGTAGCGCAGTGAATAACGCAATAGCTATGCAAAACGTTATACCA  
ACAGAGCAAAAAACATTGTAAGAATACACATGCCCGACACAACGGATGGTTGCAAAGAAATCGAGAGTGAA  
ACCGCATCGATTACAAACAGGTTTTGAAGGAGCAAACCCGAAAGCAAGAGAAAAACCTTTCCCATAGCT  
ATGTGTTATGCCATATTGAAGAGTAGAAAATGGGAAAGAAATAGCATTTCTAATAAAGAAAGATACTTGT  
CTTTGCTTGCTTTCACTTCGATACAAATGTTTTATTATGTCTT

>2

TAAAGCTACAATGATGTTAGCATATTCACATTCGATATGATACAAATAATGTTAAAAACAAGGAAAGGTTA  
ATGCTCATGAGCCCGGAAAGCAAGCAAAAAATAAAGACAAAATAATCATAAGTGTGAGTGACAGACAAA  
AACAAAGATGAACCGAAAACCTCCCGCGAGAGAATCTGATAACGAAATTTTTTACCCAACAAAACCGGAACGC  
CGTGCCATAACAAGTGAGAAAAACTAGGATTGTTTTTCTTACATGCAAAACTCGGACATTTTTTGATCAGC  
ATGCAAAAAATAGGGCGCGGGTAAAGAAAGAGACAAAAACAAATCGTCGGATAAGTTGATGAGTCATCGTTT  
TCGAGGGTTCGCTCGTTATCATAGACACATCTACGCTATAACAACACAAAAAGCATGGTAAATGGACAAAA  
CCAACACACGCGACTCACCTTACAACGTAGCGCAGTGAATAACGCAATAGCTATGCAAAACGTTATACCA  
ACAGAGCAAAAAACATTGTAAGAATACACATGCCCGACACAACGGATGGTTGCAAAGAAATCGAGAGTGAA  
ACCGCATCGATTACAAACAGGTTTTGAAGGAGCAAACCCGAAAGCAAGAGAAAAACCTTTCCCATAGCT  
ATGTGTTATGCCATATTGAAGAGTAGAAAATGGGAAAGAAATAGCATTTCTAATAAAGAAAGAAACCTGT  
CTTTGCTTGCTTTCACTTCGATACAAATGTTTTATTATGTCTT

>3

TAAAGCTACAATGATGTTAGCATATTCACATTCGATATGATACAAATAATGTTAAAAACAAGGAAAGGTTA  
ATGCTCATGAGCCCGGAAAGCAAGCAAAAAATAAAGACAAAATAATCATAAGTGTGAGTGACAGACAAA  
AACAAAGATGAACCGAAAACCTCCCGCGAGAGAATCTGATAACGAAATTTTTTACCCAACAAAACCGGAACGC  
CGTGCCATAACAAGTGAGAAAAACTAGGATTGTTTTTCTTACATGCAAAACTCGGACATTTTTTGATCAGC  
ATGCAAAAAATAGGGCGCGGGTAAAGAAAGAGACAAAAACAAATCGTCGGATAAGTTGATGAGTCATCGTTT  
TCGAGGGTTCGCTCGTTATCATAGACACATCTACGCTATAACAACACAAAAAGCATGGTAAATGGACAAAA  
CCAACACACGCGACTCACCTTACAACGTAGCGCAGTGAATAACGCAATAGCTATGCAAAACGTTATACCA  
ACAGAGCAAAAAACATTGTAAGAATACACATGCCCGACACAACGGATGGTTGCAAAGAAATCGAGAGTGAA  
ACCGCATCGATTACAAACAGGTTTTGAAGGAGCAAACCCGAAAGCAAGAGAAAAACCTTTCCCATAGCT  
ATGTGTTATGCCATATTGAAGAGTAGAAAATGGGAAAGAAATAGCATTTCTAATAAAGAAAGAAACCTGT  
CTTTGCTTGCTTTCACTTCGATACAAATGTTTTATTATGTCTT

>4

TAAAGCTACAATGATGTTAGCATATTCACATTCGATATGATACAAATAATGTTAAAAACAAGGAAAGGTTA  
ATGCTCATGAGCCCGGAAAGCAAGCAAAAAATAAAGACAAAATAATCATAAGTGTGAGTGACAGACAAA  
AACAAAGATGAACCGAAAACCTCCCGCGAGAGAATCTGATAACGAAATTTTTTACCCAACAAAACCGGAACGC  
CGTGCCATAACAAGTGAGAAAAACTAGGATTGTTTTTCTTACATGCAAAACTCGGACATTTTTTGATCAGC  
ATGCAAAAAATAGGGCGCGGGTAAAGAAAGAGACAAAAACAAATCGTCGGATAAGTTGATGAGTCATCGTTT  
TCGAGGGTTCGCTCGTTATCATAGACACATCTACGCTATAACAACACAAAAAGCATGGTAAATGGACAAAA  
CCAACACACGCGACTCACCTTACAACGTAGCGCAGTGAATAACGCAATAGCTATGCAAAACGTTATACCA  
ACAGAGCAAAAAACATTGTAAGAATACACATGCCCGACACAACGGATGGTTGCAAAGAAATCGAGAGTGAA  
ACCGCATCGATTACAAACAGGTTTTGAAGGAGCAAACCCGAAAGCAAGAGAAAAACCTTTCCCATAGCT  
ATGTGTTATGCCATATTGAAGAGTAGAAAATGGGAAAGAAATAGCATTTCTAATAAAGAAAGAAACCTGT  
CTTTGCTTGCTTTCACTTCGATACAAATGTTTTATTATGTCTT

>5

TAAAGCTACAATGATGTTAGCATATTCACATTCGATATGATACAAATAATGTTAAAAACAAGGAAAGGTTA  
ATGCTCATGAGCCCGGAAAGCAAGCAAAAAATAAAGACAAAATAATCATAAGTGTGAGTGACAGACAAA  
AACAAAGATGAACCGAAAACCTCCCGCGAGAAAATCTGATAACGAAATTTTTACCCAACAAACCGGAACGC  
CGTGCCATAACAAGTGAGAAAAACTAGGATTGTTTTCTTACATGCAAAACTCGGACATTTTTGATCACG  
ATGCAAAAATAGGGCGCGGGTAAGAAAGAGACAAAACAAATCGTCGGATAAGTTGATGAGTCATCGTTT  
TCGAGGGTTCGCTCGTTATCATAGACACATCTACGCTATAACAACACAAAAAGCATGGTAAATGGACAAAA  
CCAACACACGCGACTCACCTTACAACGTAGCGCAGTGAATAACGCAATAGCTATGCAAAACGTTATACCA  
ACAGAGCAAAAACATTGTAAGAAATACACATGCCCGACACAACGGATGGTTGCAAAGAAAATCGAGAGTGAA  
ACCGCATCGATTACAAAACAGGTTTTGAAGGAGCAAACCCGAAAGCAAGAGAAAAACCTTTCCCATAGCT  
ATGTGTTATGCCATATTGAAGAGTAGAAAATGGGAAAGAAATAGCATTTCTAATAAAGAAAGAAACCTGT  
CTTTGCTTGCTTTCACTTCGATACAAATGTTTTATTATGTCTT

>6

TAAAGCTACAATGATGTTAGCATATTCACATTCGATATAATACAAATAATGTTAAAAACAAGGAAATGTTA  
ATGCTCATGAGCCCGGAAAGCAAGCAAAAAATAAAGACAAAATAATCATAAGTGTGAGTGACAGACAAA  
AACAAAGATGAACCGAAAACCTCCCGCGAGAGAATCTGATAACGAAATTTTTACCCAACAAACCGGAACGC  
CGTGCCATAACAAGTGAGAAAAACTAGGATTGTTTTCTTACATGCAAAACTCGAACATTTTTGATCACG  
ATGCAAAAATAGGGCGCGGGTAAGAAAGAGACAAAACAAATCGTCGGATAAGTTGATGAGTCATCGTTT  
TCGAGGGTTCGCTCGTTATCATAGACACATCTACGCTATAACAACACAAAAAGCATGGTAAATGGACAAAA  
CCAACACACGCGACTCACCTTACAACGTAGCGCAGTGAATAACGCAATAGCTATGCAAAACGTTATACCA  
ACAGAGCAAAAACATTGTAAGAAATACACATGCCCGACACAACGGATGGTTGCAAAGAAAATCGAGAGTGAA  
ACCGCATCGATTACAAAACAGGTTTTGAAGGAGCAAACCCGAAAGCAAGAGAAAAACCTTTCCCATAGCT  
ATGTGTTATGCCATATTGAAGAGTAGAAAATGGGAAAGAAATAGCATTTCTAATAAAGAAAGAAACCTGT  
CTTTGCTTGCTTTCACTTCGATACAAATGTTTTATTATGTCTT

>7

TAAAGCTACAATGATGTTAGCATATTCACATTCGATATGATACAAATAATGTTAAAAACAAGGAAAGGTTA  
ATGCTCATGAGCCCGGAAAGCAAGCAAAAAATAAAGACAAAATAATCATAAGTGTGAGTGACAGACAAA  
AACAAAGATGAACCGAAAACCTCCCGCGAGAGAATCTGATAACGAAATTTTTACCCAACAAACCGGAATGC  
CGTGCCATAACAAGTGAGAAAAGCTAGGATTGTTTTCTTACATGCAAAACTCGGACATTTTTGATCACG  
ATGCAAAAATAGGGCGCGGGTAAGAAAGAGACAAAACAAATCGTCGGATAAGTTGATGAGTCATCGTTT  
TCGAGGGTTCGCTCGTTATCATAGACACATCTACGCTATAACAACACAAAAAGCATGGTAAATGGACAAAA  
CCAACACACGCGACTCACCTTACAACGTAGCGCAGTGAATAACGCAATAGCTATGCAAAACGTTATACCA  
ACAGAGCAAAAACATTGTAAGAAATACACATGCCCGACACAACGGATGGTTGCAAAGAAAATCGAGAGTGAA  
ACCGCATCGATTACAAAACAGGTTTTGAAGGAGCAAACCCGAAAGCAAGAGAAAAACCTTTCCCATAGCT  
ATGTGTTATGCCATATCGAAGAGTAGAAAATGGGAAAGAAATAGCATTTCTAATAAAGAAAGAAACCTGT  
CTTTGCTTGCTTTCACTTCGATACAAATGTTTTATTATGTCTT

>8

TAAAGCTACAATGATGTTAGCATATTCACATTCGATATGATACAAATAATGTTAAAAACAAGGAAAGGTTA  
ATGCTCATGAGCCCGGAAAGCAAGCAAAAAATAAAGACAAAATAATCATAAGTGTGAGTGACAGACAAA  
AACAAAGATGAACCGAAAACCTCCCGCGAGAGAATCTGATAACGAAATTTTTACCCAACAAACCGGAACGC  
CGTGCCATAACAATTGAGAAAAACTAGGATTGTTTTCTTACATGCAAAACTCGGACATTTTTGATCACG  
ATGCAAAAATAGGGCGCGGGTAAGAAAGAGACAAAACAAATCGTCGGATAAGTTGATGAGTCATCGTTT  
TCGAGGGTTCGCTCGTTATCATAGACACATCTACGCTATAACAACACAAAAAGCATGGTAAATGGACAAAA  
CCAACACACGCGACTCACCTTACAACGTAGCGCAGTGAATAACGCAATAGCTATGCAAAACGTTATACCA  
ACAGAGCAAAAACATTGTAAGAAATACACATGCCCGACACAACGGATGGTTGCAAAGAAAATCGAGAGTGAA  
ACCGCATCGATTACAAAACAGGTTTTGAAGGAGCAAACCCGAAAGCAAGAGAAAAACCTTTCCCATAGCT  
ATGTGTTATGCCATATTGAAGAGTAGAAAATGGGAAAGAAATAGCATTTCTAATAAAGAAAGAAACCTGT  
CTTTGCTTGCTTTCACTTCGATACAAATGTTTTATTATGTCTT

>9

TAAAGCTACAATGATGTTAGCATATTCACATTCGATATAATACAAATAATGTTAAAAACAAGGAAATGTTA

ATGCTCATGAGCCCGGAAAGCAAGCAAAAAATAAGACAAAATAATCATAAGTGTGAGTGACAGACAAA  
AACAAAGATGAACCGAAAACCTCCCGCGAGAGAATCTGATAACGAAATTTTTACCCAACAAACCGGAACGC  
CGTGCCATAACAAGTGAGAAAAACTAGGATTGTTTTCTTACATGCAAAAACCTCGAACATTTTTGATCAGC  
ATGCAAAAATAGGGCGCGGGTAAGAAAGAGACAAAACAAATCGTCGGATAAGTTGATGAGTCATCGTTTT  
TCGAGGGTTCGCTCGTTATCATAGACACATCTACGCTATAACAACACAAAAGCATGGTAAATGGACAAAA  
CCAACACACGCGACTCACCTTACAACGTAGCGCAGTGAATAACGCAATAGCTATGCAAAACGTTATACCA  
ACAGAGCAAAAACATTGTAAGAATACACATGCCCGACACAACGGATGGTTGCAAAGAAATCGAGAGTGAA  
ACCGCATCGATTACAAACAGGTTTTGAAGGAGCAAACCCGAAAGCAAGAGAAAAACCTTTCCCATAGCT  
ATGTGTTATGCCATATTGAAGAGTAGAAAATGGGAAAGAAATAGCATTTCTAATAAAGAAAGAGACCTGT  
CTTTGCTTGCTTTCACTTCGATACAAATGTTTTATTATGTCTT

## TER1

>1

ACAGATACAATTAAGAATAACTTGTAATGGTATTCACATTACTAATAAACTTCTTAATTCGTCTGTTTGG  
GTATTCATTACATATTCATCAACTAAGCAAGTCTTACATGCGTCCAAATTTGTTTAAAGACAAGAAAAATAT  
ACCATCTATGCTTAATAAAACAACTTCATCTCTTCTAGTACGCAATAAATACATTAATTTATTTTACA  
TTATAATAAGATTTCATCACTTTCTCAAAATTTTGAACCCGAAACCGAATTCAGCATGTTTTAATAAAAA  
GATGAGCAACCGCGTTCTTACTAAAACGCAATTCATAAATTTGGGAATTGTAGTTAGTAATTTTAAAT  
TTAATCATTAATAACATACCAAAAAATGGGCCCGTTCTTTTTAACATTTTGCTCAGACCAAGTGAAAAAAA  
CCTAAAACGCGCTCAAGAGGAACAACGGACGAGCTACACTCAAATATTAATGAATGGGTAGTCAACTAT  
TTTACTGGCGAACAAGCAAAAAGCTTTGATCCATGGATCTCACGTAATGTAAAATAGTATCTTCCCTAAGC  
ATTATTTATTTGAGAAACAGGACGTTTATTATTGTTTGCCGCAAAGAATCCAAGTTCAAGGAAATGAAT  
ACAGACAAGAGTTGCTATTCGTTTGAATGTACATTGTGACCACAAGTCGGTTTTTGTTCCTTCCAAATA  
GTACCTTCAACACGAAGTTGTACATTTAGCACGGACAAGAATCGACCAAAAAACCAAAATTAATGTAG  
AAGGAAAACCTTCAAGTCATTTTTTTTTATAATAGCTCTTTTAAAGTTCCATACTTTTTTATCTCCGTAACAA  
ATGCCAAAAGAAGCTAGTATAGACGAGAGCATTACGCCAACAAATTTGCACAAGCAAAAAATGTTACCAA  
TACAATTTAATATTTGTATGGGGAATTGAACTATCTATAAACTTTCTTCATTGCTTGATTTTTAGTAA  
CCTTCAGTAATCAAACGAGACTCTTCTACCAAAAATTCGTTGTGATCTGACAAGCACTTAAATGATGGAT  
ACAGAATTTATACAAAAGAAAGGTAGGATTAACCTGTAATGAACTTTAAAGGCAGAAGACTCACGTACA  
CTACACCCAGCGATTCAATTGATGTCCAGGCCTCTTTTTTCTACTGTATACAGAAGTATGAAGTCTGCA  
GCCATAATAAAAGCGGTAGGAATGATCTATGTTTTCCGCAACGCGTCAACGATTCCATGAAGAGCCTCTC  
TTATGAATGTTCTTAATGATCAAACTCTAAAAAAGCTAAAAAGAATAATTTTCGCAATGCTGAAAAGTT  
GAAGAGTACGGTTACACGAAGCAGTACAGGAATTCGAAATCCATCGAAAACAACATCCAGACAAAACCTGA  
AAAGCTAAACAGACTACTCGTTCTTTCTAGTAGACAGTATACAGTTTTTGAATAGCAAACTATACTTAA  
GGCCTATGAATCATTTTCTTCAAACCTTCAAATCAATCACCAAGTCCTCAAGAACCCTTTGATTAATTTT  
CCTTGTCAACCTTCTAAGCATGGGCGTTGCGTTGAGTATAAACAAAACAGCAATAAATCCGAGTATACAT  
GAATTGTTTTCTTCTTCAAACAAAACGCTGTTACCTTTGCGCGTATGATGACTTCCCATACTTACAAAAA  
TTTTCAAACCTAATA

>2

ACAGATACAATTAAGAATAACTTGTAATGGTATTCACATTACTAATAAACTTCTTAATTCATCTGTTTGG  
GTATTCATTACATATTCATCAACTAAGCAAGTCTTACATGCGTCCAAATTTGTTTAAAGACAAGAAAAATAT  
ACCATCTATGCTTAATAAAACAACTTCATCTCTTCTAGTACGCAATAAATACATTAATTTATTTTACA  
TTATAATAAGATTTCATCACTTTCTCAAAATTTTGAACCCGAAACCGAATTCAGCATGTTTTAATAAAAA  
GATGAGCAACCGCGTTCTTACTAAAACGCAATTCATAAATTTGGGAATTGTAGTTAGTAATTTTAAAT  
TTAATCATTAATAACATACCAAAAAATGGGCCCGTTCTTTTTAACATTTTGCTCAGACCAAGTGAAAAAAA  
CCTAAAACGCGCTCAAGAGGAACAACGGACGAGCTACACTCAAATATTAATGAATGGGTAGTCAACTAT  
TTTACTAGCGAACAAGCAAAAAGCTTTGATCCATGGATCTCACGTAATGTAAAATAGTATCTTCCCTAAGC  
ATTAATTTATTTGAGAAACAGGACGTTTATTATTGTTTGCCGCAAAGAATCCAAGTTCAAGGAAATGAAT  
ACAGACAAGAGTTGCTATTCGTTTGAATGTACATTGTGACCACAAGTCGGTTTTTGTTCCTTCCAAATA  
GTACCTTCAACACGAAGTTGTACATTTAGCACGGACAAGAATCGACCAAAAAACCAAAATTAATGTAG  
AAGGAAAACCTTCAAGTCATTTTTTTTTATAATAGCTCTTTTAAAGTTCCATACTTTTTTATCTCCGTAACAA  
ATGCCAAAAGAAGCTAGTATAGACGAGAGCATTACGCCAACAAATTTGCACAAGCAAAAAATGTTACCAA  
TACAATTTAATATTTGTATGGGGAATTGAACTATCTATAAACTTTCTTCATTGCTTGATTTTTAGTAA  
CCTTCAGTAATCAAACGAGACTCTTCTACCAAAAATTCGTTGTGATCTGACAAGCACTTAAATGATGGAT  
ACAGAATTTATACAAAAGAAAGGTAGGATTAACCTGTAATGAACTTTAAAGGCAGAAGACTCACGTACA



CTACACCCAGCGATTCAATTGATGTCCAGGCCTCTTTTTTCTACTGTATACAGAAGTATGAAGTCTGCA  
GCCATAATAAAAAGCGGTAGGAATGATCTATGTTTTCCGCAACGCGTCAACGATTCCATGAAGAGCCTCTC  
TTATGAATGTTCTAATGATCAAACTCTAAAAAAGCTAAAAAGAATAATTTTCGCAATGCTGAAAAGTT  
GAAGAGTACGGTTACACGAAGCAGTACAGGAATTCGAAATCCATCGAAAACAACCTATCCAGACAACTGA  
AAAGCTAAACAGACTACTCGTTCCTTCTAGTAGACAGTATACAGGTTTTGGAATAGCAAACCTATACTTAA  
GGCCTATGAATCATTTCCTTCAAACCTTCAAATCAATCACCAAGTCCTCAAGAACCCTTTGATTAATTTT  
CCTTGTCAACCTTCTAAGCATGGGCGTTGCGTTGAGTATAAACAAAACAGCAATAAATCCGAGTATACAT  
GAATTGTTTTCTTCTTCAAACAAAACGCTGTTACCTTTGCGCGTATGATGACTTCCCATACTTACAAAAA  
TTTTCAAACCTAATA

>3

ACAGATACAATTAAGAATAACTTGTAATGGTATTCACATTACTAATAAACTTCTAAATTCATCTGTTTGG  
GTATTCATTACATATTCATCAACTAAGCAAGTCTTACATGCGTCCAAATTTGTTTAAAGACAAGAAAAATAT  
ACCATCTATGCTTAATAAACAAACTTCATCTCTTCTAGTACGCAAATAAATACATTAATTTATTTTACA  
TTATAATAAGATTTCATCACTTTCTCAAATTTTGAACCGGAAACGGAATTCAGCATGTTTAAATAAAAA  
GATGAGCAACCGCGTTCCTTACTAAATACGCAATCTAATAATTTGGGAATTGTAGTTAGTAATTTAAAT  
TTAATCATTAATAACATACCAAAAAATGGGCCGTTTCCTTTTAAACATTTTGCTCAGACCAAGTAAAAAAA  
CCTAAAACGCGCTCAAGAGGAACAACGGACGAGCTACACTCAAATATTAATGAATGGGTAGTCAACTAT  
TTTACTAGCGAACAAGCAAAAAGCTTTGATCCATGGATCTCACGTAATGTAAAATAGTATCTTCCC TAAGC  
ATTATTTATTTGAGAAAACAGGACGTTTATTATGTTTGCCGCAAAGAATCCAAGTTCAAGGAAATGAAT  
ACAGACAAGAGTTGCTATTCGTTTGAATGTACATTGTGACCACAAGTCGGTTTTTGTTCCTTCCAAATA  
GTACCTTCAACACGAAGTTGTACATTTAGCACGGACAAGAATCGACCAAAAAACCAAAATTAATGTAG  
AAGGAAAACCTTCAAGTCATTTTTTTTTATAATAGCTCTTTTAAAGTTCCATACTTTTTATCTCCGTAACAA  
ATGCCAAAAGAAGCTAGTATAGACGAGAGCATTACGCCAACAAATTTGCACAAGCAAAAAATGTTACCAA  
TACAATTTAATATTTGTATGGGGAATTGAACTATCTATAAACTTTCTTCATTGCTTGATTTTTAGTAA  
CCTTCAGTAATCAAACGAGACTCTTCTACCAAAAATTCGTTGTGATCTGACAAGCACTTAAATGATGGAT  
ACAGAATTTATACAAATGAAAGGTAGGATTAAACTGTAAATGAACCTTTAAAGGCAGAAGACTCACGTACA  
CTACACCCAGCGATTCAATTGATGTCCAGGCCTCTTTTTTCTACTGTATACAGAAGTATGAAGTCTGCA  
GCCATAATAAAAAGCGGTAGGAATGATCTATGTTTTCCGCAACGCGTCAACGATTCCATGAAGAGCCTCTC  
TTATGAATGTTCTAATGATCAAACTCTAAAAAAGCTAAAAAGAATAATTTTCGCAATGCTGAAAAGTT  
GAAGAGTACGGTTACACGAAGCAGTACAGGAATTCGAAATCCATCGAAAACAACCTATCCAGACAACTGA  
AAAGCTAAACAGACTACTCGTTCCTTCTAGTAGACAGTATACAGGTTTTGGAATAGCAAACCTATACTTAA  
GGCCTATGAATCATTTCCTTCAAACCTTCAAATCAATCACCAAGTCCTCAAGAACCCTTTGATTAATTTT  
CCTTGTCAACCTTCTAAGCATGGGCGTTGCGTTGAGTATAAACAAAACAGCAATAAATCCGAGTATACAT  
GAATTGTTTTCTTCTTCAAACAAAACGCTGTTACCTTTGCGCGTATGATGACTTCCCATACTTACAAAAA  
TTTTCAAACCTAATA

>4

ACAGATACAATTAAGAATAACTTGTAATGGTATTCACATTACTAATAAACTTCTAAATTCATCTGTTTGG  
GTATTCATTACATATTCATCAACTAAGCAAGTCTTACATGCGTCCAAATTTGTTTAAAGACAAGAAAAATAT  
ACCATCTATGCTTAATAAACAAACTTCATCTCTTCTAGTACGCAAATAAATACATTAATTTATTTTACA  
TTATAATAAGATTTCATCACTTTCTCAAATTTTGAACCGGAAACGGAATTCAGCATGTTTAAATAAAAA  
GATGAGCAACCGCGTTCCTTACTAAATACGCAATCTGATAATTTGGGAATTGTAGTTAGTAATTTTAAAT  
TTAATCATTAATAACATACCAAAAAATGGGCCGTTTCCTTTTAAACATTTTGCTCAGACCAAGTAAAAAAA  
CCTAAAACGCGCTCAAGAGGAACAACGGACGAGCTACACTCAAATATTAATGAATGGGTAGTCAACTAT  
TTTACTAGCGAACAAGCAAAAAGCTTTGATCCATGGATCTCACGTAATGTAAAATAGTATCTTCCC TAAGC  
ATTATTTTTTTGAGAAAACAGGACGTTTATTATGTTTGCCGCAAAGAATCCAAGTTCAAGGAAATGAAT  
ACAGACCAGAGTTGCTATTCGTTTGAATGTACATTGTGACCACAAGTCGGTTTTTGTTCCTTCCAAATA  
GTACCTTCAACACGAAGTTGTACATTTAGCACGGACAAGAATCGACCAAAAAACCAAAATTAATGTAG  
AAGGAAAACCTTCAAGTCATTTTTTTTTATAATAGCTCTTTTAAAGTTCCATACTTTTTATCTCCGTAACAA  
ATGCCAAAAGAAGCTAGTATAGACGAGAGCATTACGCCAACAAATTTGCACAAGCAAAAAATGTTACCAA  
TACAATTTAATATTTGTATGGGGAATTGAACTATCTATAAACTTTCTTCATTGCTTGATTTTTAGTAA  
CGTTCAGTAATCAAACGAGACTCTTCTACCAAAAATTCGTTGTGATCTGACAAGCACTTAAATGATGGAT  
ACAGATTTTATACAAATGAAAGGTAGGATTAAACTGTAAATGAATTTTAAAGGCAGAAGACTCACGTACA  
CTGCACCCAGCGATTCAATTGATGTCCAGGCCTCTTTTTTCTACTGTATACAGAAGTATGAAGTCTGCA  
GCCATAATAAAAAGCGGTAGGAATGATCTATGTTTTCCGCAACGCGTCAACGATTCCATGAAGAGCCTCTC  
TTATGAATATTCCTAATGATCAAACTCTAAAAAAGCTAAAAAGAATAATTTTCGCAATGCTGAAAAGTT  
GAAGAGTACGGTTACACGAAGCAGTACAGGAATTCGAAATCCATCGAAAACAACCTATCCAGACAACTGA

AAAGCTAAACAGACTACTCGTTCCTTCTAGTAGACAGTATACAGGTTTTGGAATAGCAAACCTATACTTAA  
GGCCTATGAATCATTTCCCTCAAACCTTCAAATCAATCACCAAGCCCTCAAGAACCCTTGATTAATTTT  
CCTTGTCAACCTTCTAAGCATGGGCGTTGCGTTGAGTATAAAACAAAACAGCAATAAATCCGAGTATACAT  
GAATTGTTTTCTTCTCAAACAAAACGCTGTTACCTTTGCGCGTATGATGACTTCCCATACTTACAAAA  
TTTTCAAACCTAACA

>5

ACAGATACAATTAAGAATAACTTGTAATGGTATTCACATTACTAATAAACTTCTAAATTCATCTGTTTGG  
GTATTCATTACATATTCATCAACTAAGCAAGTCTTACATGCGTCCAAATTTGTTTAAAGACAAGAAAATAT  
ACCATCTATGCTTAATAAAACAACTTCATCTCTTCTAGTAGCCAAATAAATACATTAATTTATTTTACA  
TTATAATAAGATTATCACTTTCTCAAATTTTGAACCCGAAACCGAATTCAGCATGTTTTAATAAAAA  
GATGAGCAACCGCGTCTTACTAAATACGCAATTCGATAATTTGGGAATTGTAGTTAGTAATTTTAAAT  
TTAATCATTAATAACATACCAAAAAATGGGCCGCTTCTTTTAAACATTTTGCTCAGACCAAGTGA  
CCTAAAACGCGCTCAAGAGGAACAACGGACGAGCTACACTCAAATATTAATGAATGGGTAGTCAACTAT  
TTTACTAGCGAACAAGCAAAAGCTTTGATCCATGGATCTCACGTAATGTAAAATAGTATCTTCCCTAAGC  
ATTATTTTTTTGAGAAACAGGACGTTTATTATTGTTTGCCGCAAAGAATCCAAGTTCAAGGAAATGAAT  
ACAGACCAGAGTTGCTATTCGTTTGAATGTACATTGTGACCACAAGTCGGTTTTTGTTCCTTCCAAATA  
GTACCTTCAACACGAAGTTGTACATTTAGCACGGACAAGAATCGACCAAAAAACCAAAATTAATGTAG  
AAGGAAAACCTTCAAGTCATTTTTTTTTATAATAGCTCTTTTAAAGTTCCATACTTTTTTATCTCCGTAACAA  
ATGCCAAAAGAAGCTAGTATAGACGAGAGCATTACAGCCAACAAATTTGCACAAGCAAAAAATGTTACCAA  
TACAATTTAATATTTGTATGGGGAAATGAACTATCTATAAACTTTCTTTCATTGCTTGATTTTTAGTAA  
CGTTCAGTAATCAAACGAGACTCTTCTACCAAAAAATCGTTGTGATCTGACAAGCACTTAAATGATGGAT  
ACAGATTTTATACAAATGAAAGGTAGGATTAACGTAAATGAATTTTAAAGGCAGAAGACTCACGTACA  
CTGCACCCAGCGATTCAATGATGTCCAGGCCTCTTTTTTCTACTGTATACAGAAGTATGAAGTCTGCA  
GCCATAATAAAAGCGGTAGGAATGATCTATGTTTTCCGCAACGCGTCAACGATTCCATGAAGAGCCTCTC  
TTATGAATATTTCTAATGATCAAACTCTAAAAAAGCTAAAAAGAATAATTTGCAATGCTGAAAAGTT  
GAAGAGTACGGTTACACGAAGCAGTACAGGAATTCGAAATCCATCGAAAACAACATCCAGACAAACTGA  
AAAGCTAAACAGACTACTCGTTCCTTCTAGTAGACAGTATACAGGTTTTGGAATAGCAAACTATACTTAA  
GGCCTATGAATCATTTCCCTCAAACCTTCAAATCAATCACCAAGCCCTCAAGAACCCTTGATTAATTTT  
CCTTGTCAACCTTCTAAGCATGGGCGTTGCGTTGAGTATAAAACAAAACAGCAATAAATCCGAGTATACAT  
GAATTGTTTTCTTCTCAAACAAAACGCTGTTACCTTTGCGCGTATGATGACTTCCCATACTTACAAAA  
TTTTCAAACCTAACA

>6

ACAGATACAATTAAGAATAACTTGTAATGGTATTCACATTACTAATAAACTTCTAAATTCATCTGTTTGG  
GTATTCATTACATATTCATCAACTAAGCAAGTCTTACATGCGTCCAAATTTGTTTAAAGACAAGAAAATAT  
ACCATCTATGCTTAATAAAACAACTTCATCTCTTCTAGTAGCCAAATAAATACATTAATTTATTTTACA  
TTATAATAAGATTATCACTTTCTCAAATTTTGAACCCGAAACCGAATTCAGCATGTTTTAATAAAAA  
GATGAGCAACCGCGTCTTACTAAATACGCAATTCGATAATTTGGGAATTGTAGTTAGTAATTTTAAAT  
TTAATCATTAATAACATACCAAAAAATGGGCCGCTTCTTTTAAACATTTTGCTCAGACCAAGTGA  
CCTAAAACGCGCTCAAGAGGAACAACGGACGAGCTACACTCAAATATTAATGAATGGGTACTCAACTAT  
TTTACTAGCGAACAAGCAAAAGCTTTGATCCATGGATCTCACGTAATGTAAAATAGTATCTTCCCTAAGC  
ATTATTTATTTGAGAAACAGGACGTTTATTATTGTTTGCCGCAAAGAATCCAAGTTCAAGGAAATGAAT  
ACAGACAAGAGTTGCTATTCGTTTGAATGTACATTGTGACCACAAGTCGGTTTTTGTTCCTTCCAAATA  
GTACCTTCAACACGAAGTTGTACATTTAGCACGGACAAGAATCGACCAAAAAACCAAAATTAATGTAG  
AAGGAAAACCTTCAAGTCATTTTTTTTTATAATAGCTCTTTTAAAGTTCCATACTTTTTTATCTCCGTAACAA  
ATGCCAAAAGAAGCTAGTATAGACGAGAGCATTACAGCCAACAAATTTGCACAAGCAAAAAATGTTACCAA  
TACAATTTAATATTTGTATGGGGAAATGAACTATCTATAAACTTTCTTTCATTGCTTGATTTTTAGTAA  
CCTTCAGTAATCAAACGAGACTCTTCTACCAAGAATTCGTTGTGATCTGACAAGCACTTAAATGATGGAT  
ACAGAATTTATACAAATGAAAGGTAGGATTAACGTAAATGAATTTAAAGGCAGAAGACTCACGTACA  
CTACACCCAGCGATTCAATGATGTCCAGGCCTCTTTTTTCTACTGTATACAGAAGTATGAAGTCTGCA  
GCCATAATAAAAGCGGTAGGAATGATCTATGTTTTCCGCAACGCGTCAACGATTCCATGAAGAGCCTCTC  
TTATGAATGTTCTAATGATCAAACTCTAAAAAAGCTAAAAAGAATAATTTGCAATGCTGAAAAGTT  
GAAGAGTACGGTTACACGAAGCAGTACAGGAATTCGAAATCCATCGAAAACAACATCCAGACAAACTGA  
AAAGCTAAACAGACTACTCGTTCCTTCTAGTAGACAGTATACAGGTTTTGGAATAGCAAACCTATACTTAA  
GGCCTATGAATCATTTCCCTCAAACCTTCAAATCAATCACCAAGTCCTCAAGAACCCTTGATTAATTTT  
CCTTGTCAACCTTCTAAGCATGGGCGTTGCGTTGAGTATAAAACAAAACAGCAATAAATCCGAGTATACAT  
GAATTGTTTTCTTCTCAAACAAAACGCTGTTACCTTTGCGCGTATGATGACTTCCCATACTTACAAAA

TTTTCAAACCTAATA

>7

ACAGATACAATTAAGAATAACTTGTAATGGTATTACATTACTAATAAACTTCTAAATTCATCTGTTTGG  
GTATTCATTACATATTCATCAACTAAGCAAGTCTTACATGCGTCCAAATTTGCTTAAGACAAGAAAATAT  
ACCATCTATGCTTAATAAAACAACTTCATCTCTTCTAGTACGCAAATAAATACATTAATTTATTTTACA  
TTATAATAAGATTTCATCACTTTCTCAAAATTTTGAAACCGGAAACGGAATTCAGCATGTTTAAATAAAAA  
GATGAGCAACCGCGTTTCGTACTAAATACGCAATTCCTAATAATTTGGGAATTGTAGTTAGTAATTTTAAAT  
TTAATCATTAATAACATACCAAAAAATGGGCCGCTTCCTTTTAAACATTTTGCTCAGACCAAGTGAIAAAAA  
CCTAAAACGCGCTCAAGAGGAACAACGGACGAGCTACACTCAAAATATTAATGAATGGGTAGTCAACTAT  
TTTACTAGCGAACAAGCAAAAAGCTTTGATCCATGGATCTCACGTAATGTAAAATAGTATCTTCCCTAAGC  
ATTATTTATTTGAGAAAACAGGACGTTTATTATTGTTTGCCGCAAAGAATCCAAGTTCAGGAAAATGAAT  
ACAGACAAGAGTTGCTATTCGTTTGAATGTACATTGTGACCACAAGTCGGTTTTTGTTCCTTCCAAATA  
GTACCTTCAACACGAAGTTGTACATTTAGCACGGACAAGAATCGACCAAAAAACCAAAATTAATGTAG  
AAGGAAAACCTTCAAGTCATTTTTTTTTATAATAGCTCTTTTAAAGTTCCATACTTTTTATCTCCGTAAACAA  
ATGCCAAAAGAAGCTAGTATAGACGAGAGCATTAGCCAAACAAATTTGCACAAGCAAAAAATCGTTACCAA  
TACAATTTAATATTTGTATGGGGAATTGAACTATCTATAAACTTTCTTTCATTGCTTGATTTTAGTAA  
CCTTCAGTAATCAAACAAGACTCTTCTACCAAAAATTCGTTGTGATCTGACAAGCACTTAAATGATGGAT  
ACAGAATTTATACAAATGAAAGGTAGGATTAAACTGTAAATGAATTTTAAAGGCAGAAGACTCACGTACA  
CTACACCCAGCGATTCAATTGATGTCCAGGCCTCTTTTTCCCTACTGTATACAGAAGTATGAAGTCTGCA  
GCCATAATAAAAGCGGTAGGAATGATCTATGTTTTCCGCAACGCGTCAACGATTCCATGAAGAGCCTCTC  
TTATGAATGTTCCCTAATGATCAAACTCTAAAAAAGCTAAAAAGAATAATTTTCGCAATGCTGAGAAGTT  
GAAGAGTACGGTTACACGAAGCAGTACAGGAATTCGAAATCCATCGAAAACAACCTATCCAGACAACTGA  
AAAGCTAAACAGACTACTCGTTCCTTCTAGTAGACAGTATACAGGTTTTGGAATAGCAAACCTATACTTAA  
GGCCTATGAATCATTTCCCTCAAACCTTCAAATCAATCACCAAGCCCTCAAGAACCCTTGATTAATTTT  
CCTTGTCAACCTTCTAAGCATGGGCGTTGCGTTGAGTATAAACAAAACAGCAATAAATCCGAGTATACAT  
GAATTGTTTTCTTCTCAAACAAAACGCTGTTACCTTTGCGCGTATGATGACTTCCCATACTTACAAAA  
TTTTCAAACCTAATA

>8

ACAGATACAATTAAGAATAACTTGTAATGGTATTACATTACTAATAAACTTCTAAATTCATCTGTTTGG  
GTATTCATTACATATTCATCAACTAAGCAAGTCTTACATGCGTCCAAATTTGTTTGAGACAAGAAAATAT  
ACCATCTATGCTTAATAAAACAACTTCATCTCTTCTAGTACGCAAATAAATACATTAATTTATTTTACA  
TTATAATAAGATTTCATCACTTTCTCAAAATTTTGAAACCGGAAACGGAATTCAGCATGTTTAAATAAAAA  
GATGAGCAACCGCGTTTCGTACTAAATACGCAATTCCTAATAATTTGGGAATTGTAGTTAGTAATTTTAAAT  
TTAATCATTAATAACATACCAAAAAATGGGCCGCTTCCTTTTAAACATTTTGCTCAGACCAAGTGAIAAAAA  
CCTAAAACGCGCTCAAGAGGAACAACGGACGAGCTACACTCAAAATATTAATGAATGGGTAGTCAATTAT  
TTTACTAGCGAACAAGCAAAAAGCTTTGATCCATGGATCTCACGTAATGTAAAATAGTATCTTCCCTAAGC  
ATTATTTATTTGAGAAAACAGGACGTTTATTATTGTTTGCCGCAAAGAATCCAAGTTCAGGAAAATGAAT  
ACAGACAAGAGTTGCTATTCGTTTGAATGTACATTGTGACCACAAGTCGGTTTTTGTTCCTTCCAAATA  
GTACCTTCAACACGAAGTTGTACATTTAGCACGGACAAGAATCGACCAAAAAACCAAAATTAATGTAG  
AAGGAAAACCTTCAAGTCATTTTTTTTTATAATAGCTCTTTTAAAGTTCCATACTTTTTATCTCCGTAAACAA  
ATGCCAAAAGAAGCTAGTATAGACGAGAGCATTAGCCAAACAAATTTGCACAAGCAAAAAATCGTTACCAA  
TACAATTTAATATTTGTATGGGGAATTGAACTATCTATAAACTTTCTTTCATTGCTTGATTTTAGTAA  
CCTTCAGTAATCAAACAAGACTCTTCTACCAAAAATTCGTTGTGATCTGACAAGCACTTAAATGATGGAT  
ACAGAATTTATACAAATGAAAGGTAGGATTAAACTGTAAATGAATTTTAAAGGCAGAAGACTCACGTACA  
CTACACCCAGCGATTCAATTGATGTCCAGGCCTCTTTTTCCCTACTGTATACAGAAGTATGAAGTCTGCA  
GCCATAATAAAAGCGGTAGGAATGATCTATGTTTTCCGCAACGCGTCAACGATTCCATGAAGAGCCTCTC  
TTATGAATGTTCCCTAATGATCAAACTCTAAAAAAGCTAAAAAGAATAATTTTCGCAATGCTGAGAAGTT  
GAAGAGTACGGTTACACGAAGCAGTACAGGAATTCGAAATCCATCGAAAACAACCTATCCAGACAACTGA  
AAAGCTAAACAGACTACTCGTTCCTTCTAGTAGACAGTATACAGGTTTTGGAATAGCAAACCTATACTTAA  
GGCCTATGAATCATTTCCCTCAAACCTTCAAATCAATCACCAAGCCCTCAAGAACCCTTGATTAATTTT  
CCTTGTCAACCTTCTAAGCATGGGCGTTGCGTTGAGTATAAACAAAACAGCAATAAATCCGAGTATACAT  
GAATTGTTTTCTTCTCAAACAAAACGCTGTTACCTTTGCGCGTATGATGACTTCCCATACTTACAAAA  
TTTTCAAACCTAATA

>9

ACAGATACAATTAAGAATAACTTGTAATGGTATTACATTACTAATAAACTTCTAAATTCATCTGTTTGG

GTATTCATTACATATTCATCAACTAAGCAAGTCTTACATGCGTCCAAATTTGTTTAAAGACAAGAAAATAT  
ACCATCTATGCTTAATAAAACAACTTCATCTCTTCTAGTACGCAAATAAATACATTAATTTATTTTACA  
TTATAATAAGATTCATCACTTTCTCAAAAATTTGAAACCGGAAACGGAATTCAGCATGTTTAAATAAAAA  
GATGAGCAACCGCGTTCTTACTAAATACGCAATTCGATAATTTGGGAATTGTAGTTAGTAATTTTAAAT  
TTAATCATTAATAACATACCAAAAAATGGGCCCGTTCTTTTAAACATTTTGCTCAGACCAAGTGAAAAAA  
CCTAAAACGCGCTCAAGAGGAACAACGGACGAGCTACACTCAAATATTAATGAATGGGTAGTCAACTAT  
TTTACTAGCGAACAAGCAAAAAGCTTTGATCCATGGATCTCACGTAATGTAAAATAGTATCTTCCCTAAGC  
ATTATTTATTTGAGAAACAGGACGTTTATTATTGTTTGGCGCAAAGAATCCAAGTTCAAGGAAATGAAT  
ACAGACAAGAGTTGCTATTCGTTTGAATGTACATTGTGACCACAAGTCGGTTTTTGTTCCTTCCAAATA  
GTACCTTCAACACGAAGTTGTACATTTAGCACGGACAAGAATCGACCAAAAAACCAAAATTAATGTAG  
AAGGAAAACCTTCAAGTCATTTTTTTTTATAATAGCTCTTTTAAAGTTCCATACTTTTTATCTCCGTAACAA  
ATGCCAAAAGAAGCTAGTATAGACGAGAGCATTAGCCAAACAAATTTGCACAAGCAAAAATGTTTACCAA  
TACAATTTAATATTTGTATGGGGAAATTGAACTATCTATAAACTTTCTTTCATTGCTTGATTTTTAGTAA  
CCTTCAGTAATCAAACGAGACTCTTCTACCAAAAATTCGTTGTGATCTGACAAGCACTTAAATGATGGAT  
ACAGAATTTATACAAATGAAAAGGTAGGATTAACCTGTAAATGAACTTTAAAGGCAGAAAGACTCACGTACA  
CTACACCCAGCGATTCAATTGATGTCCAGGCCTCTTTTTTCTACTGTATACAGAAGTATGAAGCTGCA  
GCCATAATAAAAGCGGTAGGAATGATCTATGTTTTCCGCAACGCGTCAACGATTCCATGAAGAGCCTCTC  
TTATGAATGTTCTAATGATCAAACTCTAAAAAAGCTAAAAAGAATAATTTTCGCAATGCTGAAAAGTT  
GAAGAGTACGGTTACACGAAGCAGTACAGGAATTCGAAATCCATCGAAAACAACCTATCCAGACAACTGA  
AAAGCTAAACAGACTACTCGTTCTTTCTAGTAGACAGTATACAGGTTTTGGAATAGCAAACCTATACTTAA  
GGCCTATGAATCATTTCTTCAAACCTTTCAAATCAATCACCAAGTCCCTCAAGAACCCTTGATTAATTTT  
CCTTGTCAACCTTCTAAGCATGGGCGTTGCGTTGAGTATAAAACAAAACAGCAATAAATCCGAGTATACAT  
GAATTGTTTTCTTCTTCAAACAAAACGCTGTTACCTTTGCGCGTATGATGACTTCCCATACATACAAAA  
TTTTCAAACCTAATA

>10

ACAGATACAATTAAGAATAACTTGTAATGGTATTCACATTACTAATAAACTTCTAAATTCATCTGTTTGG  
GTATTCATTACATATTCATCAACTAAGCAAGTCTTACATGCGTCCAAATTTGTTTAAAGACAAGAAAATAT  
ACCATCTATGCTTAATAAAACAACTTCATCTCTTCTAGTACGCAAATAAATACATTAATTTATTTTACA  
TTATAATAAGATTCATCACTTTCTCAAAAATTTGAAACCGGAAACGGAATTCAGCATGTTTAAATAAAAA  
GATGAGCAACCGCGTTCTTACTAAATACGCAATTCGATAATTTGGGAATTGTAGTTAGTAATTTTAAAT  
TTAATCATTAATAACATACCAAAAAATGGGCCCGTTCTTTTAAACATTTTGCTCAGACCAAGTGAAAAAA  
CCTAAAACGCGCTCAAGAGGAACAACGGACGAGCTACACTCAAATATTAATGAATGGGTAGTCAACTAT  
TTTACTAGCGAACAAGCAAAAAGCTTTGATCCACGGATCTCACGTAATGTAAAATAGTATCTTCCCTAAGC  
ATTATTTTTTTGAGAAACAGGACGTTTATTATTGTTTGGCGCAAAGAATCCAAGTTCAAGGAAATGAAT  
ACAGACCAGAGTTGCTATTCGTTTGAATGTACATTGTGACCACAAGTCGGTTTTTGTTCCTTCCAAATA  
GTACCTTCAACACGAAGTTGTACATTTAGCACGGACAAGAATCGACCAAAAAACCAAAATTAATGTAG  
AAGGAAAACCTTCAAGTCATTTTTTTTTATAATAGCTCTTTTAAAGTTCCATACTTTTTATCTCCGTAACAA  
ATGCCAAAAGAAGCTAGTATAGACGAGAGCATTAGCCAAACAAATTTGCACAAGCAAAAATGTTTACCAA  
TACAATTTAATATTTGTATGGGGAAATTGAACTATCTATAAACTTTCTTTCATTGCTTGATTTTTAGTAA  
CGTTTCAGTAATCAAACGAGACTCTTCTACCAAAAATTCGTTGTGATCTGACAAGCACTTAAATGATGGAT  
ACAGATTTTATACAAATGAAAAGGTAGGATTAACCTGTAAATGAAATTTAAAGGCAGAAAGACTCACGTACA  
CTGCACCCAGCGATTCAATTGATGTCCAGGCCTCTTTTTTCTACTGTATACAGAAGTATGAAGCTGCA  
GCCATAATAAAAGCGGTAGGAATGATCTATGTTTTCCGCAACGCGTCAACGATTCCATGAAGAGCCTCTC  
TTATGAATATTTCTAATGATCAAACTCTAAAAAAGCTAAAAAGAATAATTTTCGCAATGCTGAAAAGTT  
GAAGAGTACGGTTACACGAAGCAGTACAGGAATTCGAAATCCATCGAAAACAACCTATCCAGACAACTGA  
AAAGCTAAACAGACTACTCGTTCTTTCTAGTAGACAGTATACAGGTTTTGGAATAGCAAACCTATACTTAA  
GGCCTATGAATCATTTCTTCAAACCTTTCAAATCAATCACCAAGCCCTCAAGAACCCTTGATTAATTTT  
CCTTGTCAACCTTCTAAGCATGGGCGTTGCGTTGAGTATAAAACAAAACAGCAATAAATCCGAGTATACAT  
GAATTGTTTTCTTCTTCAAACAAAACGCTGTTACCTTTGCGCGTATGATGACTTCCCATACTTACAAAA  
TTTTCAAACCTAACA

>11

ACAGATACAATTAAGAATAACTTGTAATGGTATTCACATTACTAATAAACTTCTTAAATTCATCTGTTTGG  
GTATTCATTACATATTCATCAACTAAGCAAGTCTTACATGCGTCCAAATTTGTTTAAAGACAAGAAAATAT  
ACCATCTATGCTTAATAAAACAACTTCATCTCTTCTAGTACGCAAATAAATACATTAATTTATTTTACA  
TTATAATAAGATTCATCACTTTCTCAAAAATTTGAAACCGGAAACGGAATTCAGCATGTTTAAATAAAAA  
GATGAGCAACCGCGTTCTTACTAAATACGCAATTCATAATAATTTGGGAATTGTAGTTAGTAATTTTAAAT

TTAATCATTAAAACATACCAAAAAATGGGCCCGTTCCTTTTAAACATTTTGCTCAGACCAAGTGAAAAAA  
CCTAAAACCGCGCTCAAGAGGAACAACGGACGAGCTACACTCAAATATTAATGAATGGGTAGTCAACTAT  
TTTACTAGCGAACAAGCAAAAAGCTTTGATCCATGGATCTCACGTAATGTAAAATAGTATCTTCCCTAAGC  
ATTATTTATTTGAGAAACAGGACGTTTCATTATTGTTTGCCGCAAAGAATCCAAGTTCAAGGAAATGAAT  
ACAGACAAGAGTTGCTATTTCGTTTGAATGTACATTGTGACCACAAGTCGGTTTTTGTTCCTTCCAAATA  
GTACCTTCAACACGAAGTTGTACATTTAGCACGGACAAGAATCGACCAAAAAACCAAAATTAATGTAG  
AAGGAAAACCTTCAAGTCATTTTTTTTATAATAGCTCTTTTAAAGTTCCATACTTTTTATCTCCGTAACAA  
ATGCCAAAAGAAGCTAGTATAGACGAGAGCATTTCAGCCAACAAATTTGCACAAGCAAAAAATGTTACCAA  
TACAATTTAATATTTGTATGGGGAAATTGAACTATCTATAAACTTTCTTCATTGCTTGATTTTTAGTAA  
CCTTCAGTAATCAAACGAGACTCTTCTACCAAAAATTCGTTGTGATCTGACAAGCACTTAAATGATGGAT  
ACAGAATTTATACAAATGAAAAGGTAGGATTAACCTGTAAATGAACTTTAAAGGCAGAAGACTCACGTACA  
CTACACCCAGCGATTCAATTGATGTCCAGGCCTCTTTTTTCTACTGTATACAGAAGTATGAAGCTGCA  
GCCATAATAAAAGCGGTAGGAATGATCTATGTTTTCCGCAACGCGTCAACGATTCCATGAAGAGCCTCTC  
TTATGAATGTTCTAATGATCAAACTCTAAAAAAGCTAAAAAGAATAATTTTCGCAATGCTGAAAAGTT  
GAAGAGTACGGTTACACGAAGCAGTACAGGAATTCGAAATCCATCGAAAACAACATCCAGACAACTGA  
AAAGCTAAACAGACTACTCGTTCCTTTCTAGTAGACAGTATACAGGTTTTGGAATAGCAAATATACTTAA  
GGCCTATGAATCATTTCTTCAAACCTTTCAAATCAATCACCAAGTCCTCAAGAACCCTTGATTAATTTTT  
CCTTGTCAACCTTCTAAGCATGGGCGTTGCGTTGAGTATAAACAAAACAGCAATAAATCCGAGTATACAT  
GAATTGTTTTCTTCTTCAAACAAAACGCTGTTACCTTTGCGCGTATGATGACTTCCCATACTTACAAAA  
TTTTCAAACCTAATA

>12

ACAGATACAATTAAGAATAACTTGTAATGGTATTCACATTACTAATAAACTTCTAAATTCATCTGTTTGG  
GTATTCATTACATATTCATCAACTAAGCAAGTCTTACATGCGTCCAAATTTGTTTAAAGACAAGAAAATAT  
ACCATCTATGCTTAATAAAACAACTTCATCTCTTCTAGTACGCAAATAAATACATTAATTTATTTTACA  
TTATAATAAGATTTCATCACTTTCTCAAATTTTGAACCGGAAACCGAATTCAGCATGTTTAAATAAAAA  
GATGAGCAACCGCGTTCCTACTAAATACGCAATTCCTAATAATTTGGGAATTGTAGTTAGTAATTTTAAAT  
TTAATCATTAAAACATACCAAAAAATGGGCCCGTTCCTTTTAAACATTTTGCTCAGACCAAGTGAAAAAA  
CCTAAAACCGCGCTCAAGAGGAACAACGGACGAGCTACACTCAAATATTAATGAATGGGTAGTCAACTAT  
TTTACTAGCGAACAAGCAAAAAGCTTTGATCCATGGATCTCACGTAATGTAAAATAGTATCTTCCCTAAGC  
ATTATTTATTTGAGAAACAGGACGTTTCATTATTGTTTGCCGCAAAGAATCCAAGTTCAAGGAAATGAAT  
ACAGACAAGAGTTGCTATTTCGTTTGAATGTACATTGTGACCACAAGTCGGTTTTTGTTCCTTCCAAATA  
GTACCTTCAACACGAAGTTGTACATTTAGCACGGACAAGAATCGACCAAAAAACCAAAATTAATGTAG  
AAGGAAAACCTTCTAGTCATTTTTTTTATAATAGCTCTTTTAAAGTTCCATACTTTTTATCTCCGTAACAA  
ATGCCAAAAGAAGCTAGTATAGACGAGAGCATTTCAGCCAACAAATTTGCACAAGCAAAAAATGTTACCAA  
TACAATTTAATATTTGTATGGGGAAATTGAACTATCTATAAACTTTCTTCATTGCTTGATTTTTAGTAA  
CCTTCAGTAATCAAACGAGACTCTTCTACCAAAAATTCGTTGTGATCTGACAAGCACTTAAATGATGGAT  
ACAGAATTTATACAAATGAAAAGGTAGGATTAACCTGTAAATGAACTTTAAAGGCAGAAGACTCACGTACA  
CTACACCCAGCGATTCAATTGATGTCCAGGCCTCTTTTTTCTACTGTATACAGAAGTATGAAGCTGCA  
GCCATAATAAAAGCGGTAGGAATGATCTATGTTTTCCGCAACGCGTCAACGATTCCATGAAGAGCCTCTC  
TTATGAATGTTCTAATGATCAAACTCTAAAAAAGCTAAAAAGAATAATTTTCGCAATGCTGAAAAGTT  
GAAGAGTACGGTTACACGAAGCAGTACAGGAATTCGAAATCCATCGAAAACAACATCCAGACAACTGA  
AAAGCTAAACAGACTACTCGTTCCTTTCTAGTAGACAGTATACAGGTTTTGGAATAGCAAATATACTTAA  
GGCCTATGAATCATTTCTTCAAACCTTTCAAATCAATCACCAAGTCCTCAAGAACCCTTGATTAATTTTT  
CCTTGTCAACCTTCTAAGCATGGGCGTTGCGTTGAGTATAAACAAAACAGCAATAAATCCGAGTATACAT  
GAATTGTTTTCTTCTTCAAACAAAACGCTGTTACCTTTGCGCGTATGATGACTTCCCATACATACAAAA  
TTTTCAAACCTAATA

>13

ACAGATACAATTAAGAATAACTTGTAATGGTATTCACATTACTAATAAACTTCTTAATTCATCTGTTTGG  
GTATTCATTACATATTCATCAACTAAGCAAGTCTTACATGCGTCCAAATTTGTTTAAAGACAAGAAAATAT  
ACCATCTATGCTTAATAAAACAACTTCATCTCTTCTAGTACGCAAATAAATACATTAATTTATTTTACA  
TTATAATAAGATTTCATCACTTTCTCAAATTTTGAACCGGAAACCGAATTCAGCATGTTTAAATAAAAA  
GATGAGCAACCGCGTTCCTACTAAATACGCAATTCCTAATAATTTGCGAATTGTAGTTAGTAATTTTAAAT  
TTAATCATTAAAACATACCAAAAAATGGGCCCGTTCCTTTTAAACATTTTGCTCAGACCAAGTGAAAAAA  
CCTAAAACCGCGCTCAAGAGGAACAACGGACGAGCTACACTCAAATATTAATGAATGGGTAGTCAACTAT  
TTTACTAGCGAACAAGCAAAAAGCTTTGATCCATGGATCTCACGTAATGTAAAATAGTATCTTCCCTAAGC  
ATTATTTATTTGAGAAACAGGACGTTTCATTATTGTTTGCCGCAAAGAATCCAAGTTCAAGGAAATGAAT

ACAGACAAGAGTTGCTATTCGTTTGAATGTACATTGTGACCACAAGTCGGTTTTTGTTCCTTCCAAATA  
GTACCTTCAACACGAAGTTGTACATTTAGCACGGACAAAGAATCGACCAAAAAACCAAATTAATGTAG  
AAGGAAAACCTTCAAGTCATTTTTTTTATAATAGCTCTTTTAAGTTCCATACTTTTTATCTCCGTAACAA  
ATGCCAAAAGAAGCTAGTATAGACGAGAGCATTTCAGCCAACAAATTTGCACAAGCAAAAATTGTTACCAA  
TACAATTTAATATTTGTATGGGGAATTGAAACTATCTATAAAACTTTCTTCATTGCTTGATTTTTAGTAA  
CCTTCAGTAATCAAACGAGACTCTTCTACCAAAAAATTCGTTGTGATCTGACAAGCACTTAAATGATGGAT  
ACAGAATTTATACAAATGAAAGGTAGGATTAAACTGTAAATGAACTTTAAAGGCAGAAGACTCACGTACA  
CTACACCCAGCGATTCAATTGATGTCCAGGCCCTTTTTTCTACTGTATACAGAAGTATGAAGTCTGCA  
GCCATAATAAAAAGCGGTAGGAATGATCTATGTTTTCCGCAACGCGTCAACGATTCATGAAGAGCCTCTC  
TTATGAATGTTCCCTAATGATCAAACTCTAAAAAAGCTAAAAAGAATAATTTTCGCAATGCTGAAAAGTT  
GAAGAGTACGGTTACACGAAGCAGTACAGGAATTCGAAATCCATCGAAAACAACTATCCAGACAACTGA  
AAAGCTAAAACAGACTACTCGTTCTTTCTAGTAGACAGTATACAGGTTTTGGAAATAGCAAATACTTAA  
GGCCTATGAATCATTTCCTTCAAACCTTTCAAAATCAATCACCAGTCCCAAGAACCCTTGATTAATTTT  
CCTTGTAACCTTCTAAGCATGGGCGTTGCGTTGAGTATAAACAAAACAGCAATAAATCCGAGTATACAT  
GAATTGTTTCTTCTTCAAACAAAACGCTGTTACCTTTGCGCGTATGATGACTTCCATACTTACAAAA  
TTTTCAAACCTAATA

>14

ACAGATACAATTAAGAATAACTTGTAATGGTATTCACATTACTAATAAACTTCTAAATTCATCTGTTTGG  
GTATTCATTACATATTCATCAACTAAGCAAGTCTTACATGCGTCCAAATTTGTTTAAGACAAGAAAATAT  
ACCATCTATGCTTAATAAACAACTTCATCTCTTAGTACGCAAATAAATACATTAATTTATTTTACA  
TTATAATAAGATTCATCACTTTCTCAAAATTTGAAACCGGAAACGGAATTCAGCATGTTTAATAAAAA  
GATGAGCAACCGGTTCTTACTAAATACGCAATTCGTATAATTTGGGAATGTAGTTAGTAATTTAAAT  
TTAATCATTAAAACATAACAAAAAATGGGCCCTTCTTTTAACATTTTGCTCAGACCAAGTAAAAAAA  
CCTAAAACGCGCTCAAGAGGAACAACGGACGAGCTACACTCAAATATTAATGAATGGGTAGTCAACTAT  
TTTACTAGCGAACAAGCAAAAGCTTTGATCCATGGATCTCACGTAATGTAATAAGTATCTTCCCTAAGC  
ATTATTTTTTGGAAACAGGACGTTTCAATATGTTTGCCGCAAAGAATCCAAGTTCAAGGAAATGAAT  
ACAGACCAAGTTGCTATTCGTTTGAATGTACATTGTGACCACAAGTCGGTTTTTGTTCCTTCCAAATA  
GTACCTTCAACACGAAGTTGTACATTTAGCACGGACAAAGAATCGACCAAAAAACAAATTAATGTAG  
AAGGAAAACCTTCAAGTCATTTTTTTTATAATAGCTCTTTTAAGTTCCATACTTTTTATCTCCGTAACAA  
ATGCCAAAAGAAGCTAGTATAGACGAGAGCATTTCAGCCAACAAATTTGCACAAGCAAAAATTGTTACCAA  
TACAATTTAATATTTGTATGGGGAATTGAAACTATCTATAAAACTTTCTTCATTGCTTGATTTTTAGTAA  
CGTTCAGTAATCAAACGAGACTCTTCTACCAAAAAATTCGTTGTGATCTGACAAGCACTTAAATGATGGAT  
ACAGATTTTATACAAATGAAAGGTAGGATTAAACTGTAAATGAAATTTAAAGGCAGAAGACTCACGTACA  
CTGCACCCAGCGATTCAATTGATGTCCAGGCCCTTTTTTCTACTGTATACAGAAGTATGAAGTCTGCA  
GCCATAATAAAAAGCGGTAGGAATGATCTATGTTTTCCGCAACGCGTCAACGATTCATGAAGAGCCTCTC  
TTATGAATATTCCTAATGATCAAACTCTAAAAAAGCTAAAAAGAATAATTTTCGCAATGCTGAAAAGTT  
GAAGAGTACGGTTACACGAAGCAGTACAGGAATTCGAAATCCATCGAAAACAACTATCCAGACAACTGA  
AAAGCTAAAACAGACTACTCGTTCTTTCTAGTAGACAGTATACAGGTTTTGGAAATAGCAAATACTTAA  
GGCCTATGAATCATTTCCTTCAAACCTTTCAAAATCAATCACCAGCCCTCAAGAACCCTTGATTAATTTT  
CCTTGTAACCTTCTAAGCATGGGCGTTGCGTTGAGTATAAACAAAACAGCAATAAATCCGAGTATACAT  
GAATTGTTTCTTCTTCAAACAAAACGCTGTTACCTTTGCGCGTATGATGACTTCCATACTTACAAAA  
TTTTCAAACCTAACA

## TER1 + 30

>1

TTATTGAGAAAGTGGATTCAATCAGCTATATGTTAAGCATTAGTAATTGAAGAGGTCTCTCATTTTACTTT  
AATCGAAGCTGCTATGGAATTTGACTTTATGGCTGATTAGAAGCGTGTACTGTATACTCACCTCGTTTAA  
CATTTCTTTGACTCGAATTCGCAATTTGGTCTTCACGACCCATTCCAGCTTCCCGTGAAGCTTGTTCTGGTA  
AATGAATAGCAAGTTTTTCTGTATGGCTTGACGAAACACCGATTTTACGTAATGTAATCGTTGATACTT  
ATAAAGTGTAAAATCAGATTTTCTAATTTCAAATTTAAAAGCATAAATAAAAGCTCTAAACTACATGGGAT  
TATGAAACACACCTTTCCAATGCAATTTTGGTAAAACGCTAGCATCTCCGTGAGACGACATGAATGCTAG  
AAAGAAATGTTTTTCTTTAAGAATATATGATTAATAGATTAGAATATATTAAGAGAAAGTTAAATTTTTAG  
CTGAGAGATAGAAATCATTAGTCTGAAAAGAATTTGGATGTGATAGTA

>2

TTATTGAGAAAGTGGATTCAATCAGCTATATGTTAAGCATTAGTAATTGAAGAGGTCTCT  
CATTTTACTTTAATCGAAGCTGCTATGGAATTTGACTTTATGGCTGATTAGAAGCGTGT

ACTGTATACTCACCTCGTTTAAACATTTCTTTGACTCGAATTCGCAATTGGTCTTCACGAC  
CCATTCCAGCTTCCCCTGAAGCTTGTTCTGGTAAATGAATAGCAAGTTTTTCTTGTATGG  
CTTGGCGAAACACCGATTTTACGTAACGTAAATCGTTGATACTTAGAAAAGTGTAAAAATC  
AGATTTTCTAATTTCAAATTTAAAAGCATAAAATAAAAGCTCTAAACTACAATGGGATTATG  
AAACACACCTTTCCAATGCAATTTTTGGTAAAACGCTAGCATCTCCGTGAGACGACATGA  
ATGCTAGAAAAGAAATGATTTTCTTTAAGAATATATGATTAATAGATTAGAATATATTAAG  
AGAAAGTTAAATTTTTAGCTGAGAGATAGAAATCATTAGTCTGAAAAGAATTTGGATGTG  
ATAGTA

>3

TTATTGAGAAAAGTGGATTCAATCAGCTATATGTTAAGCATTAGTAATTGGAGAGGTCTCT  
CATTTTACTTTAATCGAAGCTGCTATGGAATTTGACTTTTATGGCTGATTAGAAGCGTGT  
ACTGTATACTCACCTCGTTTAAACATTTCTTTGACTCGAATTCGCAATTGGTCTTCACGAC  
CCATTCCAGCTTCCCCTGAAGCTTGTTCTGGTAAATGAATAGCAAGTTTTTCTTGTATGG  
CTTGACGAAACACCGATTTTACGTAACGTAAATCGTTGATACTTATAAAAGTGTAAAAATC  
AGATTTTCTAATTTCAAATTTAAAAGCATAAAATAAAAGCTCTAAACTACA-TGGGATTATG  
AAACACACCTTTCCAATGCAATTTTTGGTAAAACGCTAGCATCTCCGTGAGACGACATGA  
ATGCTAGAAAAGAAATGATTTTCTTTAAGAATATATGATTAATAGATTAGAATATATTAAG  
AGAAAGTTAAATTTTTAGCTGAGAGATAGAAATCATTAGTCTGAAAAGAATTTGGATGTG  
ATAGTA

>4

TTATTGAGAAAAGTGGATTCAATCAGCTATATGTTAAGCATTAGTAATTGAAGAGGTCTCT  
CATTTTACTTTAATCGAAGCTGCTATGGAATTTGACTTTTATGGCTGATTAGAAGCGTGT  
ACTGTATACTCACCTCGTTTAAACATTTCTTTGACTCGAATTCGCAATTGGTCTTCACGAC  
CCATTCCAGCTTCCCCTGAAGCTTGTTCTGGTAAATGAATAGCAAGTTTTTCTTGTATGG  
CTTGACGAAACACCGATTTTACGTAACGTAAATCGTTGATACTTATAAAAGTGTAAAAATC  
AGATTTTCTAATTTCAAATTTAAAAGCATAAAATAAAAGCTCTAAACTACAATGGGATTATG  
AAACACACCTTTCCAATGCAATTTTTGGTAAAACGCTAGCATCTCCGTGAGACGACATGA  
ATGCTAGAAAAGAAATGATTTTCTTTAAGAATATATGATTAATAGATTAGAATATATTAAG  
AGAAAGTTAAATTTTTAGCTGAGAGATAGAAATCATTAGTCTGAAAAGAATTTGGATGTG  
ATAGTA

>5

TTATTGAGAAAAGTGGATTCAATCAGCTATATGTTAAGCATTAGTAATTGAAGAGGTCTCT  
CGTTTTACTTTAATCGAAGCTGCTATGGAATTTGACTTTTATGGCTGATTAGAAGCGTGT  
ACTGTATACTCACCTCGTTTAAACATTTCTTTGACTCGAATTCGCAATTGGTCTTCACGAC  
CCATTCCAGCTTCCCCTGAAGCTTGTTCTGGTAAATGAATAGCAAGTTTTTCTTGTATGG  
CATGGCGAAACACCGATTTTACGTAACGTAAATCGTTGATACTTAGAAAAGTGTAAAAATC  
AGATTTTCTAATTTCAAATTTAAAAGCATAAAATAAAAGCTCTAAACTACAATGGGATTATG  
AAACACACCTTTCCAATGCAATTTTTGGTAAAACGCTAGCATCTCCGTGAGACGACATGA  
ATGCTAGAAAAGAAATGATTTTCTTTAAGAATATATGATTAATAGATTAGAATATATTAAG  
AGAAAGTTAAATTTTTAGCTGAGAGATAGAAATCATTAGTCTGAAAAGAATTTGGATGTG  
ATAGTA

>6

TTATTGAGAAAAGTGGATTCAATCAGCTATATGTTAAGCATTAGTAATTGAAGAGGTCTCT  
CATTTTACTTTAATCGAAGCTGCTATGGAATTTGACTTTTATGGCTGATTAGAAGCGTGT  
ACTGTATACTCACCTCGTTTAAACATTTCTTTGACTCGAATTCGCAATTGGTCTTCACGAC  
CCATTCCAGCTTCCCCTGAAGCTTGTTCTGGTAAATGAATAGCAAGTTTTTCTTGTATGG  
CTTGACGAAACACCGATTTTACGTAACGTAAATCGTTGATACTTATAAAAGTGTAAAAATC  
AGATTTTCTAATTTCAAATTTAAAAGCATAAAATAAAAGCTCTAAACTACAATGGGATTATG  
AAACACACCTTTCCAATGCAATTTTTGGTAAAACGCTAGCATCTCCGTGAGACGACATGA  
ATGCTAGAAAAGAAATGATTTTCTTTAAGAATATATGATTAATAGATTAGAATATATTAAG  
AGAAAATTTAAATTTTTAGCTGAGAGATAGAAATCATTAGTCTGAAAAGAATTTGGATGTG  
ATAGTA

## TER1 + 100

>1

ATCAAGAAACGTTCCCCTACTGTGCAAGTTGCGCTTGATGAATACGCTCAAAAATCCCTCTACTGCATCT  
GAGACACTAGTAAACAAGGAGCTTGCTAATTTTTTCATCTATAAAGGAAGCTGTTTCGAAAACCTAGAAC

TGCGGGAAAAAGTGCGGGCCCTTGAATGCGATGTGCGAAATCCAAAAGCAAACGTGTC CAATATCAAATTC  
CAATGCAGTTAAAGAAAATTCAAATACACTTTTCAGAGCAAATGAAAAATTTGGAAAGTGAGTTAAATTCG  
TCAAAAATAAAAAATGAGTCCTTACTTAATGAACGAAATTTACTGAAAGAAATGTTAGCTACTTCTCGAA  
GCAGTATTTTGTCTCACAATTCTTCCGCGGGCAATATTGATGACAAAATGAAATCCATTGATGAATCTAC  
AAGAGA ACTTGAGAAAAATTACGAAGTTTATCGTAACGAAATGACAGCTATT CAGGAATCCTTGTCTAAG  
CGAAATCAGGATTTGTTGAGTGAGATGGAAGCGATACGTAAGAGTTAGAAAATTTCAAATATCAGCAGC  
AGTTATCTACTGATAGATTA ACTAATGCTAATAATGACGTTGAAGCCTT

>2

ATCAAGAAACGTTCCCGCTACTGTGCAAGTTGCGCTTGATGAATACGCTCAAATCCCTCTACTGCATCT  
GAGACACTAGTAAACAAGGAGCTTGCTAATTTTTCATCTATAAAGGAAGCTGTTTCGAAAACCTCTAGAAC  
TGCGGGAAAAAGTGCGGGCCCTTGAATGCGATGTTGAAATCCAAAAGCAAACGTGTC CAATATCAAATTC  
CAATGCAGTTAAAGAAAATTCAAATACACTTTTCAGAGCAAATCAAATTTGGAAAGTGAGTTAAATTCG  
TCAAAAATAAAAAATGAGTCCTTACTTAATGAACGAAATTTACTGAAAGAAATGTTAGCTACTTCTCGAA  
GCAGTATTTTGTCTCACAATTCTTCCGCGGGCAATATTGATGACAAAATGAAATCCATTGATGAATCTAC  
AAGAGA ACTTGAGAAAAATTACGAAGTTTATCGTAACGAAATGACAGCTATT CAGGAATCCTTGTCTAAG  
CGAAATCAGGATTTGTTGAGTGAGATGGAAGCAATACGTAAGAGTTAGAAAATTTCAAATATCAGCAGC  
AGTTATCTACTGATAGATTA ACTAATGCTAATAATGACGTTGAAGCCTT

>3

ATCAAGAAACGTTCCCGCTACTGTGCAAGTTGCGCTTGATGAATACGCTCAAATCCCTCTACTGCATCT  
GAGACACTAGTAAACAAGGAGCTTGCTAATTTTTCATCTATAAAGGAAGCTGTTTCGAAAACCTCTAGAAC  
TGCGGGAAAAAGTGCGGGCCCTTGAATGCGATGTGCGAAATCCAAAAGCAAACGTGTC CAATATCAAATTC  
CAATGCAGTTAAAGAAAATTCAAATACACTTTTCAGAGCAAATCAAATTTGGAAAGTGAGTTAAATTCG  
TCAAAAATAAAAAATGAGTCCTTACTTAATGAACGAAATTTACTGAAAGAAATGTTAGCTACTTCTCGAA  
GCAGTATTTTGTCTCACAATTCTTCCGCGGGCAATATTGATGACAAAATGAAATCCATTGATGAATCTAC  
AAGAGA ACTTGAGAAAAATTACGAAGTTTATCGTAACGAAATGACAGCTATT CAGGAGTCTTGTCTAAG  
CGAAATCAGGATTTGTTGAGTGAGATGGAAGCGATACGTAAGAGTTAGAAAATTTCAAATATCAGCAGC  
AGTTATCTACTGATAGATTA ACTAATGCTAATAATGACGTTGAAGCCTT

>4

ATCAAGAAACGTTCCCGCTACTGTGCAAGTTGCGCTTGATGAATACGCTCAAATCCCTCTACTGCATCT  
GAGACACTAGTAAACAAGGAGCTTGCTAATTTTTCATCTATAAAGGAAGCTGTTTCGAAAACCTCTAGAAC  
TGCGGGAAAAAGTGCGGGCCCTTGAATGCGATGTTGAAATCCAAAAGCAAACGTGTC CAATATCAAATTC  
CAATGCAGTTAAAGAAAATTCAAATACACTTTTCAGAGCAAATCAAATTTGGAAAGTGAGTTAAATTCG  
TCAAAAATAAAAAATGAGTCCTTACTTAATGAACGAAATTTACTGAAAGAAATGTTAGCTACTTCTCGAA  
GCAGTATTTTGTCTCACAATTCTTCCGCGGGCAATATTGATGACAAAATGAAATCCATTGATGAATCTAC  
AAGAGA ACTTGAGAAAAATTACGAAGTTTATCGTAACGAAATGACAGCTATT CAGGAATCCTTGTCTAAG  
CGAAATCAGGATTTGTTGAGTGAGATGGAAGCGATACGTAAGAGTTAGAAAATTTCAAATATCAGCAGC  
AGTTATCTACTGATAGATTA ACTAATGCTAATAATGACGTTGAAGCCTT

>5

ATCAAGAAACGTTCCCGCTACTGTGCAAGTTGCGCTTGATGAATACGCTCAAATCCCTCTACTGCATCT  
GAGACACTAGTAAACAAGGAGCTTGCTAATTTTTCATCTATAAAGGAAGCTGTTTCGAAAACCTCTAGAAC  
TGCGGGAAAAAGTGCGGGCCCTTGAATGCGATGTGCGAAATCCAAAAGCAAACGTGTC CAATATCAAATTC  
CAATGCAGTTAAAGAAAATTCAAATACACTTTTCAGAGCAAATGAAAAATTTGGAAAGTGAGTTAAATTCG  
TCAAAAATAAAAAATGAGTCCTTACTTAATGAACGAAATTTACTGAAAGAAATGTTAGCTACTTCTCGAA  
GCAGTATTTTGTCTCACAATTCTTCCGCGGGCAATATTGATGACAAAATGAAATCCATTGATGAATCTAC  
AAGAGA ACTTGAGAAAAATTACGAAGTTTATCGTAACGAAATGACAGCTATT CAGGAATCCTTGTCTAAG  
CGAAATCAGGATTTGTTGAGTGAGATGGAAGCGATACGTAAGAGTTAGAAAATTTCAAATATCAGCAGC  
AGTTATCTACTGATAGATTA ACTAATGCTAATAATGACGTTGAAGCCTT

**CC2L**

>1

CAGCACGGACGGTAAGCTCGCGATGGGCGGATGCATGGGATTACGGTTTGGAAAGCAACGACGCGATT  
CCAGTTGTTACGCTGGAAGTCAGAGCGAAGTTGAGCAGGTGAGTAGCGGTACTCTACGAAATCGAAATGG  
CGAATAGGAGTAACGGCTTGAAGTTTACCACCAACATACACATTTCCAGCACGACCAAACAAGTAGTCGA



CGGCAGGGTGGGCGCGATCATTAGCACCAAATACCTTTTCAGCTTCGTTTCGCCTTATCTGGGGTATACTT  
GTCCTCAACAGTCAAAAATGGCAATAACAGTTTGCCCATCCCTAGGATCTAATAATGCAACACGATCACCG  
GCCTTCAAAGAATCGGCCTGCGATTCATTGAGGTCCAAGGTGATAGGGATGGGAAAGACCTCGCCAGTGC  
TGAGACGCAAATTCTCGACGACATTCAAATAATCCTTTTGGTTTCATGAATCCGTCTAATGGACTGAAACC  
TCCGTTCAAATGAGTTCCACATCGCAAACCTGACGTTCCGATAGTACAATTTTGGGAAGGCTAGTAGCC  
TCCTGTTCCAGTTGTTCTCTCAGAGGAGCATCTCTGGCGTTAAGATCTTTCAACAAAGCTTTAGTCATTT  
TGACACCCCAAATCGTAAAGGACCTGCTT

>2

CAGCACGGACGGTAAGCTCACGATGGGCGCGATGCATGGGATTACGGGTTTGGAAAAGCAACGACGCGATT  
CCAGTTGTTACGCTGGAAGTCAGAGCGAAGTTGAGCAGGTGAGTAGCGGTACTCTACGAAATCGAAATGG  
CGAATAGGAGTAACGGCTTGAAGTTTACCACCAACATACACATTTCCAGCACGACCAAACAAGTAGTCGA  
CGGCAGGGTGGGCGCGATCATTAGCACCAAATACCTTTTCAGCTTCGTTTCGCCTTATCTGGGGTATACTT  
GTCCTCAACAGTCAAAAATGGCAATAACAGTTTGCCCATCCCTAGGATCTAATAATGCAACACGATCACCG  
GCCTTCAAAGAATCGGCCTGCGATTCATTGAGGTCCAAGGTGATAGGGATGGGAAAGACCTCGCCAGTGC  
TGAGACGCAAATTCTCGACGACATTCAAATAATCCTTTTGGTTTCATGAATCCGTCTAATGGACTGAAACC  
TCCGTTCAAATGAGTTCCACATCGCAAACCTGACGTTCCGATAGTACAATTTTGGGAAGGCTAGTAGCC  
TCCTGTTCCAGTTGTTCTCTCAGAGGAGCATCTCTGGCGTTAAGATCTTTCAACAAAGCTTTAGTCATTT  
TGACACCCCAAATCGTAAAGGACCTGCTT

>3

CAGCACGGACGGTAAGCTCACGATGGGCGCGATGCATGGGATTACGGGTTTGGAAAGCAACGACGCGATT  
CCAGTTGTTACGCTGGAAGTCAGAGCGAAGTTGAGCAGGTGAGTAGCGGTA CTCTACGAAATCGAAATGG  
CGAATAGGAGTAACGGCTTGAAGTTTACCACCAACATACACATTTCCAGCACGATCAAACAAGTAGTTCGA  
CGGCAGGGTGGGCGCGATCATTAGCACCAAAATACCTTTTTCAGCTTCGTTTCGCCTTATCTGGGGTATACTT  
GTCCTCAACAGTCAAATGGCAATAACAGTTTGCCCATCCCTAGGATCTAATAATGCAACACGATCACCG  
GCCTTCAAAGAATCGGCCTGCGATTCAATTGAGGTCCAAGGTGATAGGGATGGGAAAGACCTCGCCAGTGC  
TGAGACGCAAATTCGACGACATTCAAATAATCCTTTTGGTTCATGAATCCGTCTAATGGACTGAAACC  
TCCGTTCAAATGAGTTCACATCGCAAACCTGACGTTCCGATAGTACAATTTTGGGAAGGCTAGTAGCC  
TCCTGTTCCAGTTGTTCTCTCAGAGGAGCATCTCTGGCGTTAAGATCTTTCAACAAAGCTTTAGTCATTT  
TGACACCCCAAATCGTAAAGGACCTGCTT

>4

CAGCACGGACGGTAAGCTCACGATGGGCGCGATGCATGGGATTACGGGTTTGGAAAGCAACGACGCGATT  
CCAGTTGTTACGCTGGAAGTCAGAGCGAAGTTGAGCAGGTGAGTAGCGGTA CTCTACGAAATCGAAATGG  
CGAATAGGAGTAACGGCTTGAAGTTTACCACCAACATACACATTTCCAGCACGACCAAACAAGTAGTTCGA  
CGGCAGGGTGGGCGCGATCATTAGCACCAAAATACCTTTTTCAGCTTCGTTTCGCCTTATCTGGGGTATACTT  
GTCCTCAACAGTCAAATGGCAATAACAGTTTGCCCATCCCTAGGATCTAATAATGCAACACGATCACCG  
GCCTTCAAAGAATCGGCCTGCGATTCAATTGAGGTCCAAGGTGATAGGGATGGGAAAGACCTCGCCAGTGC  
TGAGACGCAAATTCGACGACATTCAAATAATCCTTTTGGTTCATGAATCCGTCTAATGGACTGAAACC  
TCCGTTCAAATGAGTTCACATCGCAAACCTGACGTTCCGATAGTACAATTTTGGGAAGGCTAGTAGCC  
TCCTGTTCCAGTTGTTCTCTCAGAGGAGCATCTCTGGCGTTAAGATCTTTCAACAAAGCTTTAGTCATTT  
TGACACCCCAAATCGTAAAGGACCTGGTT

>5

CAGCACGGACGGTAAGCTCACGATGGGCGCGATGCATGGGATTACGGGTTTGGAAAGCAACGACGCGATT  
CCAGTTGTTACGCTGGAAGTCAGAGCGAAGTTGAGCAGGTGAGTAGCGGTA CTCTACGAAATCGAAATGG  
CGAATAGGAGTAACGGCTTGAAGTTTACCACCAACATACACATTTCCAGCACGACCAAACAAGTAGTTCGA  
CGGCAGGGTGGGCGCGATCATTAGCACCAAAATACCTTTTTCAGCTTCGTTTCGCCTTATCTGGGGTATACTT  
GTCCTCAACAGTCAAATGGCAATAACAGTTTGCCCATCCCTAGGATCTAATAATGCAACACGATCACCG  
GCCTTCAAAGAATCGGCCTGCGATTCAATTGAGGTCCAAGGTGATAGGGATGGGAAAGACCTCGCCAGTGC  
TGAGACGCAAATTCGACGACATTCAAAGTAATCCTTTTGGTTCATGAATCCGTCTAATGGACTGAAACC  
TCCGTTCAAATGAGTTCACATCGCAAACCTGACGTTCCGATAGTACAATTTTGGGAAGGCTAGTAGCC  
TCCTGTTCCAGTTGTTCTCTCAGAGGAGCATCTCTGGCGTTAAGATCTTTCAACAAAGCTTTAGTCATTT  
TGACACCCCAAATCGTAAAGGACCTGCTT

## CC2R

>1

GTGCCTTTATATTCTTTAACAAGGCTATATGTTTTAGCTTTGTAAGAAGGATGGCGATCTCGTACAGCGG  
TACGATGTCCCAAGACACCACCAAGACACCAATGAGAACACTACAAATTAAGCGACTATAAAAAATAA  
TATCCAAATAAAGTAACGTCGGTACCAAGGCAATAACTTTTTCTCTGCAGCCTTTTCGTTAAAGGCTTCA  
TTGTTTTCGTTATTATTATTGCTATCAAGGTTTTTCATGGTCATTATCGTGATCATCAATTTTCAGTGTCTG  
TATGATTGTCGATAACATCATTAGTTGACTCGTTCCTTGCCTGCCGGTTCGTAATATTCTCAAAGCTAGC  
AGAGGACAATGCAGCAGATGAGAGACTATGGCGTGAATCTGTAGTGGAATCAGGAATACCCATTGCAAAA  
GTAGTAAAAGTTAATCAAATTTCAACAAATTAAGAAGGGCGAGAAAAATCAAAAAGAAAGAAAAGATAA  
GAATAAAAAGAGCGGGAAGTAATGAGACACGATCAAATAAAAAAATGCCAATCTGGTGAGCTATGCACCA  
AGTTTCAGAAATGGAAATAAAATGCTAGTAAAAATAACCAAACCTCAAGGATATCTTGTTAAAGGGGAATAA  
AAAAGGGAATATGGGATAATGCTTTGTAGAGATGAGAAATGCGGTTTAAATGAAAATAATTATTATCG  
AAAGACGATAGATAGGGAG

>2

GTGCCTTTATATTCTTTAACAAGGCTATATGTTTTAGCTTTGTAAGAAGGATGGCGATCTCGTACAGCGG  
TACGATGTCCCAAGACACCACCAAGACACCAATGAGAACACTACAAATTAAGCGACTATAAAAAATAA  
TATCCAAATAAAGTAACGTCGGTACCAAGGCAATAACTTTTTCTCTGCAGCCTTTTCGTTAAAGGCTTCA  
TTGTTTTCGTTATTATTATTGCTATCAAGGTTTTTCATGGTCATTATCGTGATCATCAATTTTCAGTGTCTG  
TATGATTGTCGATAACATCATTAGTTGACTCGTTCCTTGCCTGCCGGTTCGTAATATTCTCAAAGCTAGC

AGAGGACAATGCAGCAGATGAGAGACTATGGCGTGAATCTGTCTGGAATCAGGAATACCCATTGCAAAA  
GTAGTAAAAGTTAATCAAATTTCAACAAATTAAGAAGGGCGAGAAAAATCAAAAAGAAAAGATAA  
GAATAAAAAGAGCGGGAAGTAATGAGACACGATCAAATAAAAAAATGCCAATCTGGTGAGCTATGCACCA  
AGTTCAGAAATGGAAATAAAATGCTAGTAAAAATAACCAAACCTCAAGGATATCTTGTTAAAGGGGAATAA  
AAAAGGGAAATATGGGATAATGCTTTGTAGAGATGAGAAATGCGGTTTAAAATGAAAAATAATTATTATCG  
AAAGACGATAGATAGGGAG

>3

GTGCCTTTATATTCTTTAACAAGGCTATATGTTTTAGCTTTGTAAGAAGGATGGCGATCTCGTACAGCGG  
TACGATGTCCCAAGACACCACCCAAGACACCAATGAGAACACTACAAATTAAGCGACTATAAAAAATTAA  
TATCCAAATAAAGTAACGTCGGTACCAAGGCAATAACTTTTTCTCTGCAGCCTTTTCGTTAAAGGCTTCA  
TTGTTTTCGTTATTATTATGCTATCAAGGTTTTCATGGTCATTATCGTGATCATCAATTTTCAGTGTCTG  
TATGATTGTGCGATAACATCATTAGTTGACTCGTTCCTGCGTGCCGGGTCGTAAATATTCTCAAAGCTAGC  
AGAGGACAACGCAGCAGATGAGAGACTATGGCGTGAATCTGTAGTGAATCAGGAATACCCATTGCAAAA  
GTAGTAAAAGTTAATCAAATTTCAACAAATTAAGAAGGGCGAGAAAAATCAAAAAGAAAAGATAA  
GAATAAAAAGAGCGGGAAGTAATGAGACACGATCAAATAAAAAAATGCCAATCTGGTGAGCTATGCACCA  
AGTTCAGAAATGGAAATAAAATGCTAGTAAAAATAACCAAACCTCAAGGATATCTTGTTAAAGGGGAATAA  
AAAAGGGAAATATGGGATAATGCTTTGTAGAGATGAGAAATGCGGTTTAAAATGAAAAATAATTATTATCG  
AAAGACGATAGATAGGGAG

>4

GTGCCCTTATATTCTTTAACAAGGCTATATGTTTTAGCTTTGTAAGAAGGATGGCGATCTCGTACAGCGG  
TACGATGTCCCAAGACACCACCCAAGACACCAATGAGAACACTACAAATTAAGCGACTATAAAAAATTAA  
TATCCAAATAAAGTAACGTCGGTACCAAGGCAATAACTTTTTCTCTGCAGCCTTTTCGTTAAAGGCTTCA  
TTGTTTTCGTTATTATTATGCTATCAAGGTTTTCATGGTCATTATCGTGATCATCAATTTTCAGTGTCTG  
TATGATTGTGCGATAACATCATTAGTTGACTCGTTCCTGCGTGCCGGGTCGTAAATATTCTCAAAGCTAGC  
AGAGGACAATGCAGCAGATGAGAGACTATGGCGTGAATCTGTAGTGAATCAGGAATACCCATTGCAAAA  
GTAGTAAAAGTTAATCAAATTTCAACAAATTAAGAAGGGCGAGAAAAATCAAAAAGAAAAGATAA  
GAATAAAAAGAGCGGGAAGTAATGAGACACGATCAAATAAAAAAATGCCAATCTGGTGAGCTATGCACCA  
AGTTCAGAAATGGAAATAAAATGCTAGTAAAAATAACCAAACCTCAAGGATATCTTGTTAAAGGGGAATAA  
AAAAGGGAAATATGGGATAATGCTTTGTAGAGATGAGAAATGCGGTTTAAAATGAAAAATAATTATTATCG  
AAAGACGATAGATAGGGAG

>5

GTGCCTTTATATTCTTTAACAAGGCTATATGTTTTAGCTTTGTAAGAAGGATGGCGATCTCGTACAGCGG  
TACGATGTCCCAAGACACCACCCAAGACACCAATGAGAACACTACAAATTAAGCGACTATAAAAAATTAA  
TATCCAAATAAAGTAACGTCGGTACCAAGGCAATAACTTTTTCTCTGCAGCCTTTTCGTTAAAGGCTTCA  
TTGTTTTCGTTATTATTATGCTATCAAGGTTTTCATGGTCATTATCGTGATCATCAATTTTCAGTGTCTG  
TATGATTGTGCGATAACATCATTAGTTGACTCGTTCCTGCGTGCCGGGTCGTAAATATTCTCAAAGCTAGC  
AGAGGACAACGCAGCAGATGAGAGACTATGGCGTGAATCTGTAGTGAATCAGGAATACCCATTGCAAAA  
GTAGTAAAAGTTAATCAAATTTCAACAAATTAAGAAGGGCGAGAAAAATCAAAAAGAAAAGATAA  
GAATAAAAAGAGCGGGAAGTAATGAGACACGATCAAATAAAAAATATGCCAATCTGGTGAGCTATGCACCA  
AGTTCAGAAATGGAAATAAAATGCTAGTAAAAATAACCAAACCTCAAGGATATCTTGTTAAAGGGGAATAA  
AAAAGGGAAATATGGGATAATGCTTTGTAGAGATGAGAAATGCGGTTTAAAATGAAAAATAATTATTATCG  
AAAGACGATAGATAGGGAG

>6

GTGCCTTTATATTCTTTAACAAGGCTATATGTTTTAGCTTTGTAAGAAGGATGGCGATCTCGTACAGCGG  
TACGATGTCCCAAGACACCACCCAAGACACCAATGAGAACACTACAAATTAAGCGACTATAAAAAATTAA  
TATCCAAATAAAGTAACGTCGGTACCAAGGCAATAACTTTTTCTCTGCAGCCTTTTCGTTAAAGGCTTCA  
TTGTTTTCGTTATTATTATGCTATCAAGGTTTTCATGGTCATTATCGTGATCATCAATTTTCAGTGTCTG  
TATGATTGTGCGATAACATCATTAGTTGACTCGTTCCTGCGTGCCGGGTCGTAAATATTCTCAAAGCTAGC  
AGAGGACAACGCAGCAGATGAGAGACTATGGCGTGAATCTGTAGTGAATCAGGAATACCCATTGCAAAA  
GTAATAAAAAGTTAATCAAATTTCAACAAATTAAGAAGGGCGAGAAAAATCAAAAAGAAAAGATAA  
GAATAAAAAGAGCGGGAAGTAATGAGACACGATCAAATAAAAAAATGCCAATCTGGTGAGCTATGCACCA  
AGTTCAGAAATGGAAATAAAATGCTAGTAAAAATAACCAAACCTCAAGGATATCTTGTTAAAGGGGAATAA  
AAAAGGGAAATATGGGATAATGCTTTGTAGAGATGAGAAATGCGGTTTAAAATGAAAAATAATTATTATCG  
AAAGACGATAGATAGGGAG

>7

GTGCCCTTATATTCTTTAACAAGGCTATATGTTTTAGCTTTGTAAGAAGGATGGCGATCTCGTACAGCGG  
TACGATGTCCCAAGACACCACCCAAGACACCAATGAGAACACTACAAATTAAGCGACTATAAAAAATTAA  
TATCCAAATAAAGTAACGTCGGTACCAAGGCAATAACTTTTTCTCTGCAGCCTTTTCGTTAAAGGCTTCA  
TTGTTTTCGTTATTATTATGCTATCAAGGTTTTTCATGGTCATTATCGTGATCATCAATTTTCAGTGTCTG  
TATGATTGTGCGATAACATCATTAGTTGACTCGTTCCTGCGTGCCGGGTCGTAAATATTCTCAAAGCTAGC  
AGAGGACAACGCAGCAGATGAGAGACTATGGCGTGAATCTGTAGTGGAATCAGGAATACCCATTGCAAAA  
GTAGTAAAAGTTAATCAAATTTCAACAAATTAAGAAGGGCGAGAAAAATCAAAAAGAAAAGATAA  
GAATAAAAAGAGCGGGAAGTAATGAGACACGATCAAATAAAAAAATGCCAATCTGGTGAGCTATGCACCA  
AGTTTCAGAAATGGAAATAAAATGCTAGTAAAAATAACCAAACCTCAAGGATATCTTGTAAAGGGGAATAA  
AAAAGGGAAATATGGGATAATGCTTTGTAGAGATGAGAAATGCGGTTTAAAATGAAAATAATTATTATCG  
AAAGACGATAGATAGGGAG

## Central core chromosome II

>1

AGATTTGAGCAATAATTTCCCTAAAACATTTACAATTAATGGGTTATTTTTTTTTTTT-CTAAAAATTGAAGG  
AGCTTGTTTTGATCTATTCCGTTATTAGTATGTAAATTTAAAAAATCGTATCCCTAACTAATTCATACTTA  
AACATAATATGCAGATTTTAAAAATAATTGTCCATATAGATAACACGCGGAATACTTAGAAAAGTAGAATT  
GGCCGAAGCCAAAAAGGAAACATAGAAATCAACCAGGACTAACCAATGCTTCTTCATATTAACGAGTAAC  
GCGGCTTACGCATCACAAAGCAGTACGTGTGAATAAATATTATTGGAAAACATTTTTCTTTAACCAGCTA  
AACCGCTTAAAGAAAAATGAATAAGATACAAATTTTTCAGGTTTTTGCTTTGATGCTAAAAACTCGTCGAA  
TTCTAAAACCAAGAATTAACGTACCCTTAACTTTTTTTTTTTT-GATTTTCGTAATAATAATTATCGGAG  
TTCGCGTTTTTCATTTTAAAAAAA-GGTTTAGTAAATCTCAAATTTGCGATACGAACAATGATAATGATATT  
TTCAGATAAACGTTACTTAATAGCATCTTATAGTCATGGGCCATCTCAATATTACCATTAAACTTTTAAG  
CAAAAAGATCATTTCTATTTTAAAAAACCTAATAAAAAATTACCTTTTGTAAGTATACGTTTGCTAAACAA  
TAAAAGAACGTAATACTAA

>2

AGATTTGAGCAATAATTTCCCTAAAACATTTACAATTAATGGGTTATTTTTTTTTTTT-CTAAAAATTGAAGG  
AGCTTGTTTTGATCTATTCCGTTATTAGTATGTAAATTTAAAAAATCGTATCCCTAACTAATTCATACTTA  
AACATAATATGCAGATTTTAAAAATAATTGTCCATATAGATAACACGCGGAATACTTAGAAAAGTAGAATT  
GGCCGAAGCCAAAAAGGAAACATAGAAATCAACCAGGACTAACCAATGCTTCTTCATATTAACGAGTAAC  
GCGGCTTACGCATCACAAAGCAGTACGTGTGAATAAATATTATTGGAAAACATTTTTCTTTAACCAGCTA  
AACCGCTTAAAGAAAAATGAATAAGATACAAATTTTTCAGGTTTTTGCTTTGATGCTAAAAACTCGTCGAA  
TTCTAAAACCAAGAATTAACGTACCCTTAACTTTTTTTTTTTT-GATTTTCGTAATAATAATTATCGGAG  
TTCGCGTTTTTCATTTTAAAAAAAAGGTTTAGTAAATCTCAAATTTGCGATACGAACAATGATAATGATATT  
TTCAGATAAACGTTACTTAATAGCATCTTATAGTCATGGGCCATCTCAATATTACCATTAAACTTTTAAG  
CAAAAAGATCATTTCTATTTTAAAAAACCTAATAAAAAATTACCTTTTGTAAGTATACGTTTGCTAAACAA  
TAAAAGAACGTAATACTAA

>3

AGATTTGAGCAATAATTTCCCTAAAACATTTACAATTAATGGGTTATTTTTTTTTTTT-CTAAAAATTGAAGG  
AGCTTGTTTTGATCTATTCCGTTATTAGTATGTAAATTTAAAAAATCGTATCCCTAACTAATTCATACTTA  
AACATAATATGCAGATTTTAAAAATAATTGTCCATATAGATAACACGCGGAATACTTAGAAAAGTAGAATT  
GGCCGAAGCCAAAAAGGAAACATAGAAATCAACCAGGACTAACCAATGCTTCTTCATATTAACGAGTAAC  
GCGGCTTACGCATCACAAAGCAGTACGTGTGAATAAATATTATTGGAAAACATTTTTCTTTAACCAGCTA  
AACCGCTTAAAGAAAAATGAATAAGATACAAATTTTTCAGGTTTTTGCTTTGATGCTAAAAACTCGTCGAA  
TTCTAAAACCAAGAATTAACGTACCCTTAACTTTTTTTTTTTT--GATTTTCGTAATAATAATTATCGGAG  
TTCGCGTTTTTCATTTTAAAAAAA-GATTTTAGTAAATCTCAAATTTGCGATACGAACAATGATAATGATATT  
TTCAGATAAACGTTACTTAATAGCATCTTATAGTCATGGGCCATCTCAATATTACCATTAAACTTTTAAG  
CAAAAAGATCATTTCTATTTTAAAAAACCTAATAAAAAATTACCTTTTGTAAGTATACGTTTGCTAAACAA  
TAAAAGAACGTAATACTAA

>4

AGATTTGAGCAATAATTTCCCTAAAACATTTACAATTAATGGGTTATTTTTTTTTTTT-CTAAAAATTGAAGG  
AGCTTGTTTTGATCTATTCCGTTATTAGTATGTAAATTTAAAAAATCGTATCCCTAACTAATTCATACTTA  
AACATAATATGCAGATTTTAAAAATAATTGTCCATATAGATAACACGCGGAATACTTAGAAAAGTAGAATT  
GGCCGAAGCCAAAAAGGAAACATAGAAATCAACCAGGACTAACCAATGCTTCTTCATATTAACGAGTAAC  
GCGGCTTACGCATCACAAAAGCAGTACGTGTGAATAAATATTATTGGAAAACATTTTTCTTTAACCAGCTA  
AACCGCTTAAAGAAAAATGAATAAGATACAAATTTTCAGGTTTTTGCTTTGATGCTAAAAACTCGTCGAA  
TTCTAAAACCAAGAATTAACGTACCCTTAACTTTTTTTTTTTT-GATTTTTCGTACTAATAATTATCGGAG  
TTCGCGTTTTTCATTTTAAAAAAA-GGTTTAGTAAATCTCAAATTGCGA-----ACAATGATAATGATATT  
TTCAGATAAACGTTACTTAATAGCATCTTATAGTCATGGGCCATCTCAATATTACCATTAAACTTTTAAG  
CAAAAAGATCATTTCTATTTTAAAAAACCTAATAAAAATTACCTTTTGTAAGTATACGTTTGCTAAACAA  
TAAAAGAACGTAATACTAA

>5

AGATTTGAGCAATAATTTCCCTAAAACATTTACAATTAATGGGTTATTTTTTTTTTTT-CTAAAAATTGAAGG  
AGCTTGTTTTGATCTATTCCGTTATTAGTATGTAAATTTAAAAAATCGTATCCCTAACTAATTCATACTTA  
AACATAATATGCAGATTTTAAAAATAATTGTCCATATAGATAACACGCGGAATACTTAGAAAAGTAGAATT  
GGCCGAAGCCAAAAAGGAAACATAGAAATCAACCAGGACTAACCAATGCTTCTTCATATTAACGAGTAAC  
GCGGCTTACGCATCACAAAAGCAGTACGTGTGAATAAATATTATTGGAAAACATTTTTCTTTAACCAGCTA  
AACCGCTTAAAGAAAAATGAATAAGATACAAATTTTCAGGTTTTTGCTTTGATGCTAAAAACTCGTCGAA  
TTCTAAAACCAAGAATTAACGTACCCTTAACTTTTTTTTTTTT-GATTTTTCGTACTAATAATTATCGGAG  
TTCGCGTTTTTCATTTTAAAAAAA-GGTTTAGTAAATCTCAAATTGCGATACGAACAATGATAATGATATT  
TTCAGATAAACGTTACTTAATAGCATCTTATAGTCATGGGCCATCTCAATATTACCATTAAACTTTTAAG  
CAAAAAGATCATTTCTATTTTAAAAAACCTAATAAAAATTACCTTTTGTAAGTATACGTTTGCCAAACAA  
TAAAAGAACGTAATACTAA

>6

AGATTTGACCAATAATTTCCCTAAAACATTTACAATTAATGCGTTATTTTTTTTTTTTCTAAAAATTGAAGG  
AGCTTGTTTTGATCTATTCCGTTATTAGTATGTAAATTTAGAAAATCGTATCCCTAACTAATTCATACTTA  
AACCTAATATGCAGATTTTAAAAATAATAGTCCATAAAGATAACACACGGAATACTTAAAAAGTAGAATT  
GGCCGAAGCCAAAAAGGAAACATAGAAATCAACCAGGACTAACCAATGCTTCTTCATATTAACGAGTAAC  
--GGCTTACGCATCACAAAAGCAGTACATGTGAATAAATATTATTGGAAAACATTTTTCTTTAACCAGCTA  
AACCGCTTAAAGAAAAATGAATAAGATACAAATCTTCAGGTTTTTGCTTTGATGCTAAAAACTCGTCGAA  
TTTTAAAACCAAGAATTAACGTACCCTTCACTTTTTTTTTTTTGGATTTTCGTAATAATGATATTATCGGAG  
TTCGCGTTTTTCATTTTAAAAAAA-GGTTTAGTAAATCTCAAATTGCGATACGAACAATGATAATGATATT  
TTCAGATAAACGTTACTTAATAGCATCTTATAGTCATGGGCCATCTCAATATTACCATTAAACTTTTAAG  
CAAAAAGATCATTTCTATTTTAAAAAATCTAATAAAAATTACCTTTTGTAAGTATACGTTTGCTAAACAA  
TAAAAGAACATATTACTAA

>7

AGATTTGAGCAATAATTTCCCTAAAACATTTACAATTAATGGGTTATTTTTTTTTTTT-CTAAAAATTGAAGG  
AGCTTGTTTTGATCTATTCCGTTATTAGTATGTAAATTTAAAAAATCGTATCCCTAACTAATTCATACTTA  
AACATAATATGCAGATTTTAAAAATAATTGTCCATATAGATAACACGCGGAATACTTAGAAAAGTAGAATT  
GGCCGAAGCCAAAAAGGAAACATAGAAATCAACCAGGACTAACCAATGCTTCTTCATATTAACGAGTAAC  
GCGGCTTACGCATCACAAAAGCAGTACGTGTGAATAAATATTATTGGGAAAACATTTTTCTTTAACCAGCTA  
AACCGCTTAAAGAAAAATGAATAAGATACAAATTTTCAGGTTTTTGCTTTGATGCTAAAAACTCGTCGAA  
TTCTAAAACCAAGAATTAACGTACCCTTAACTTTTTTTTTTTT-GATTTTTCGTACTAATAATTATCGGAG  
TTCGCGTTTTTCATTTTAAAAAAA-GGTTTAGTAAATCTCAAATTGCGA-----ACAATGATAATGATATT  
TTCAGATAAACGTTACTTAATAGCATCTTATAGTCATGGGCCATCTCAATATTACCATTAAACTTTTAAG  
CAAAAAGATCATTTCTATTTTAAAAAACCTAATAAAAATTACCTTTTGTAAGTATACGTTTGCTAAACAA  
TAAAAGAACGTAATACTAA

>8

AAATTTGAGCAATAATTTCCCTAAAACATTTACAATTAATGGGTTATTTTTTTTTTT-CTAAAAATTGAAGG  
AGCTTGTTTTGATCTATTCCGTTATTAGTATGTAAATTTAAAAAATCGTATCCCTAACTAATTCATACTTA  
AACATAATATGCAGATTTTAAAATAATTGTCCATATAGATAACACGCGGAATACTTAGAAAAGTAGAATT  
GGCCGAAGCCAAAAAGGAAACATAGAAATCAACCAGGACTAACCAATGCTTCTTCATATTAACGAGTAAC  
GCGGCTTACGCATCACAAAGCAGTACGTGTGAATAAATATTATTGGAAAACATTTTTCTTTAACCAGCTA  
AACCGCTTAAAGAAAAATGAATAAGATACAAATTTTCAGGTTTTTGCTTTGATGCTAAAACTCGTCGAA  
TTCTAAAACCAAGAATTAACGTACCCTTAACTTTTTTTTTTT-GATTTTCGTACTAATAATTATCGGAG  
TTCGCGTTTTTCATTTTTAAAAAAA-GGTTTAGTAAATCTCAAATTCGATACGAACAATGATAATGATATT  
TTCAGATAAACGTTACTTAATAGCATCTTATAGTCATGGGCCATCTCAATATTACCATTAAACTTTTAAG  
CAAAAAGATCATTTCTATTTTTAAAAAACCTAATAAAAAATTACTTTTGTAAGTATACGTTTGCTAAACAA  
TAAAAGAACGTAATACTAA

>9

AGATTTGACCAATAATTTCCCTAAAACATTTACAATTAATGCGTTATTTTTTTTTTTCTAAAAATTGAAGG  
AGCTTGTTTTGATCTATTCCGTTATTAGTATGTAAATTTAGAAAATCGTATCCCTAACTAATTCATACTTA  
AACCTAATATGCAGATTTTAAAATAATAGTCCATAAAGATAACACGCGGAATACTTAAAAAAGTAGAATT  
GGCCGAAGCCAAAAAGGAAACATAGAAATCAACCAGGACTAACCAATGCTTCTTCATATTAACGAGTAAC  
--GGCTTACGCATCACAAAGCAGTACATGTGAATAAATATTATTGGAAAACATTTTTCTTTAACCAGCTA  
AACCGCTTAAAGAAAAATGAATAAGATACAAATCTTCAGGTTTTTGCTTTGATGCTAAAACTCGTCGAA  
TTTTAAAACCAAGAATTAACGTACCCTTCAACTTTTTTTTTTTGATTTTCGTACTAATGATTATCGGAG  
TTCGCGTTTTTCATTTTTAAAAAAA-GGTTTAGTAAATCTCAAATTCGATACGAACAATGATAATGATATT  
TTCAGATAAACGTTACTTAATAGCATCTTATAGTCATGGGCCATCTCAATATTACCATTAAACTTTTAAG  
CAAAAAGATCATTTCTATTTTTAAAAAATCTAATAAAAAATTACTTTTGTAAGTATACGTTTGCTAAACAA  
TAAAAGAACATATTACTAA

>10

AGATTTGAGCAATAATTTCCCTAAAACATTTACAATTAATGGGTTATTTTTTTTTTT-CTAAAAATTGAAGG  
AGCTTGTTTTGATCTATTCCGTTATTAGTATGTAAATTTAAAAAATCGTATCCCTAACTAATTCATACTTA  
AACATAATATGCAGATTTTAAAATAATTGTCCATATAGATAACACGCGGAATACTTAGAAAAGTAGAATT  
GGCCGAAGCCAAAAAGGAAACATAGAAATCAACCAGGACTAACCAATGCTTCTTCATATTAACGAGTAAC  
GCGGCTTACGCATCACAAAGCAGTACGTGTGAATAAATATTATTGGAAAACATTTTTCTTTAACCAGCTA  
AACCGCTTAAAGAAAAATGAATAAGATACAAATTTTCAGGTTTTTGCTTTGATGCTAAAACTCGTCGAA  
TTCTAAAACCAAGAATTAACGTACCCTTAACTTTTTTTTTTT-GATTTTCGTACTAATAATTATCGGAG  
TTCGCGTTTTTCATTTTTAAAAAAA-GGTTTAGTAAATCTCAAATTCGATACGAACAATGATAATGATATT  
TTCAGATAAACGTTACTTAATAGCATCTTATAGTCATGGGCCATCTCAATATTACCATTAAACTTTTAAG  
CAAAAAGATCATTTCTATTTTTAAAAAACCTAATAAAAAATTACTTTTAGTAAGTATACGTTTGCTAAACAA  
TAAAAGAACGTAATACTAA

**Table S3 Primers used to make probes used in hybridization analysis**

| Name           | Sequence                       | Chromosome | Position        |
|----------------|--------------------------------|------------|-----------------|
| CENDistal1LF   | CCCAAGAAACGTCATGTGTG           | 1          | 196555-196574   |
| CENDistal1LR   | CTACCAGGAGCCTTCAGTGC           | 1          | 197476-197457   |
| CENDistal1RF   | CACTTCGTGCAAAGCAAAAA           | 1          | 4745750-4745769 |
| CENDistal1RR   | ACAATTGCCAACCTCCTCAC           | 1          | 4746658-4746639 |
| CENDistal2LF   | TTGGTCTCGAAGGAGCATCT           | 2          | 751963-751982   |
| CENDistal2LR   | ATTCCACCAATTTCCAACA            | 2          | 752829-752810   |
| CENDistal2RF   | TTCGATAGGTCGGATTCCAG           | 2          | 3761023-3761042 |
| CENDistal2RR   | ATCTCTGCCAACCAACAAC            | 2          | 3761895-3761876 |
| CENDistal3LF   | TCAAACAATCCATCGGACAA           | 3          | 501513-501532   |
| CENDistal3LR   | GATGCGGAAGCTAAATCGAG           | 3          | 502474-502455   |
| CENDistal3RF   | GTGACGTAATGCCCGAGTT            | 3          | 2004488-2004507 |
| CENDistal3RR   | AGATTCGGGTTTCAGTGGTG           | 3          | 2005446-2005465 |
| CENproximal1LR | AAAGGCTGTCCGGTGTATGG           | 1          | 3733956-3733937 |
| CENproximal1LF | CGGTGAACCTGACAATGATG           | 1          | 3733183-3733202 |
| CENproximal1RF | CGTCAATCCTCAATTCAGAGTTCC       | 1          | 3792899-3792922 |
| CENproximal1RR | TATGTCAAAGAAGCCTCGATAAAGAAG    | 1          | 3793712-3793738 |
| CENproximal2LF | GATCGATATCACCAGGCTTGTC         | 2          | 1572261-1572283 |
| CENproximal2LR | GCGAGAAATTGCCAATTGCCGAC        | 2          | 1573046-1573068 |
| CENproximal2RF | AAGTGACATCACAAGTCCGACTTC       | 2          | 1650281-1650304 |
| CENproximal2RL | AACTTGGAACCAATAAAATTGAG        | 2          | 1651324-1651301 |
| CENproximal3LF | AATAGGGAAGCCGATTGTTCTTACAGATGT | 3          | 1061733-1061762 |
| CENproximal3LR | TATCTATGGAAAGCATTAGAACGA       | 3          | 1062572-1062549 |
| CENproximal3RF | GTTTCGTCATTTATTAATCATTAG       | 3          | 1145013-1145036 |
| CENproximal3RR | AACCCCTTACACCTCCTCAAGATC       | 3          | 1145732-1145709 |

**Table S4 Primers used to amplify DNA for diversity analys**

| Sequence                                    | Primer F      | Sequence                   | Primer R      | Sequence                 |
|---------------------------------------------|---------------|----------------------------|---------------|--------------------------|
| SPBC660.16 intron 3                         | SPBC660L      | gccgacaagggtaagtttt        | SPBC660R      | ttaccttggcttcgtttgc      |
| Central core of centromere of chromosome II | CNT21L        | cacagaagcgagacatgttt       | CNT21R        | ggataagacacttcgcaaaa     |
| TER                                         | TRC19F        | tgtttgatctacctcgtttatattca | TRC1409R      | aaaaagaggcctggacatca     |
| TER                                         | TRC667F       | aacctaaaacgcgctcaaga       | TRC1983R      | ttgaatgtaatgtagcccttaaaa |
| CEN2:left flank                             | CENFlank2LF   | gatcgatatcaccaggcttggtc    | CENFlank2LR   | gcgagaaattgccaattgccgac  |
| CEN2:right flank                            | CENFlank2IRF  | gcactgctgttacggtaag        | CENFlank2IRR  | aagctggttggcttttatcc     |
| TER; I-3113975-3114540                      | TRCflank1F    | gccagatcaaatggctcaat       | TRCflank1R    | acaacgttgggatcaagagg     |
| TER; I-3194538-3195201                      | 100TRCFlank1F | ttaaagcctcttgctcctt        | 100TRCFlank1R | ctcaccgcatctcgactca      |



**Table S5 The proliferative lag (time to initiate proliferation), proliferative rate (population doubling time) and proliferative efficiency of natural *S. pombe* isolates over 42 environments**

Table S5 is available for download at <http://www.g3journal.org/lookup/suppl/doi:10.1534/g3.111.001123/-/DC1> as a text file.

The proliferative lag (time to initiate proliferation), proliferative rate (population doubling time) and proliferative efficiency (change in population density) were extracted from high density growth curves (n=2) of natural *S. pombe* isolates (N=2) over 42 environments. The data set shows proliferation variables relative the *S. cerevisiae* universal type strain BY4741,  $\log_2$  [isolate/BY4741], in each environment.
