# Supplementary material for: A Geographically Diverse Collection of Schizosaccharomyces pombe Isolates Shows Limited Phenotypic Variation but Extensive Karyotypic Diversity
Source: PubMed Central journal article supplement (PMC3276172; doi:10.1534/g3.111.001123), 2011-12-01
Supplement: supp_1.7.615_FigureS7.pdf [file supp_1.7.615_FigureS7.pdf]

CEN2 L; 659bp

Haplotype:

abundance

|      |         |
|------|---------|
| 1:17 | G C A C |
| 2:19 | A . . . |
| 3:1  | A T . . |
| 4:2  | A . . G |
| 5:1  | A . G . |

**1572349**  
**1572524**  
**1572778**  
**1572987**

CEN2 R; 719bp

Haplotype:

abundance

|      |           |
|------|-----------|
| 1:23 | T T A G A |
| 2:3  | . . C . . |
| 3:4  | . C . . . |
| 4:1  | C . . . . |
| 5:1  | . C . . T |
| 6:7  | . C . A . |
| 7:1  | C C . . . |

**1658038**  
**1658392**  
**1658425**  
**1658455**  
**1658566**

CEN2 compound haplotypes

Haplotype:

abundance

|      |         |
|------|---------|
| 1:17 | G T T G |
| 2:6  | A T C G |
| 3:10 | A T T G |
| 4:7  | A A C A |

**1572349**  
**1621091**  
**1658392**  
**1658455**

**Figure S7** SNPs flanking the centromere and informative SNPs used in four gamete test. The figure illustrates the positions of the SNPs identified in the sequences flanking the centromere of chromosome II. Informative SNPs are shown in bold. The four compound haplotypes composed of informative SNPs are indicated below.
