# Supplementary material for: A Geographically Diverse Collection of Schizosaccharomyces pombe Isolates Shows Limited Phenotypic Variation but Extensive Karyotypic Diversity
Source: PubMed Central journal article supplement (PMC3276172; doi:10.1534/g3.111.001123), 2011-12-01
Supplement: supp_1.7.615_FigureS8.pdf [file supp_1.7.615_FigureS8.pdf]

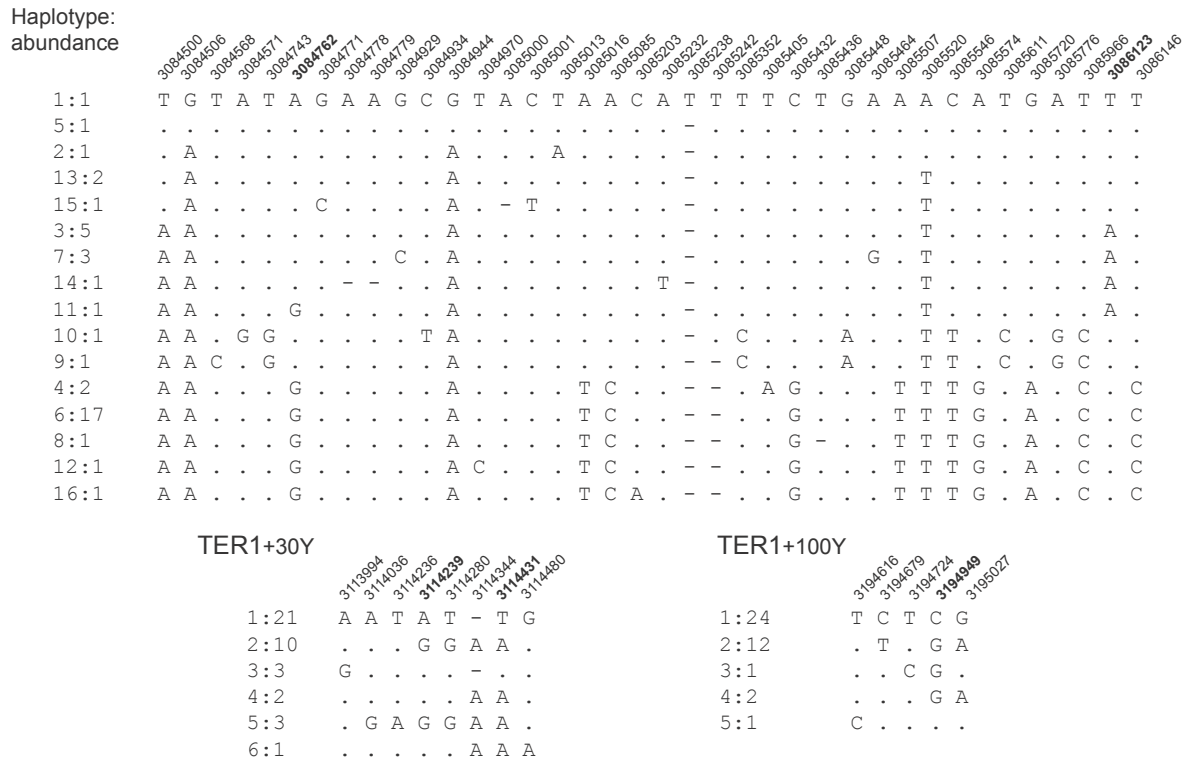

**Figure S8** SNPs identified in the TER1 gene and in adjacent sequences. The figure illustrates the positions of the SNPs identified in the TER1 gene and the two adjacent sequences studied. Informative SNPs used in the linkage disequilibrium (Table 4) measurements are shown in bold.
