# Supplementary material for: A Geographically Diverse Collection of Schizosaccharomyces pombe Isolates Shows Limited Phenotypic Variation but Extensive Karyotypic Diversity
Source: PubMed Central journal article supplement (PMC3276172; doi:10.1534/g3.111.001123), 2011-12-01
Supplement: supp_1.7.615_TableS1.pdf [file supp_1.7.615_TableS1.pdf]

**Table S1 Strains used in this study**

| Strain number                                                   | Source-Collection | Date of isolation | Source                                               | Location isolated      |
|-----------------------------------------------------------------|-------------------|-------------------|------------------------------------------------------|------------------------|
| UWOPS 92.229.4                                                  | MA Lachance UWOPS | unknown to us     | Tequilla                                             | Mexico, Jalisco        |
| UWOPS 94.422.2                                                  | MA Lachance UWOPS | unknown to us     | Tequilla                                             | Mexico, Jalisco        |
| UFMG 790=CBS10459                                               | Carlos Rosa UFMG  | 1996              | Must of Brazilian cachaça;<br>Frozen pulp of Eugenia | Brazil:Vicosá          |
| UFMG R435=CBS10458                                              | Carlos Rosa UFMG  | 1999              | uniflora;                                            | Brazil: Aracaju        |
| UFMG A1263=CBS10469                                             | Carlos Rosa UFMG  | 1996              | Must of Brazilian cachaça;                           | Brazil:Vicosá          |
| UFMG A602=CBS10460                                              | Carlos Rosa UFMG  | 1996              | Must of Brazilian cachaça;<br>Frozen pulp of Eugenia | Brazil: Belo Horizonte |
| UFMG R420=CBS10472                                              | Carlos Rosa UFMG  | 1996              | uniflora                                             | Brazil; Aracaju        |
| UFMG A1153=CBS10468                                             | Carlos Rosa UFMG  | 1996              | Must of Brazilian cachaça;<br>Frozen pulp of Eugenia | Brazil: Salinas        |
| UFMG R434=CBS10476                                              | Carlos Rosa UFMG  | 1999              | uniflora                                             | Brazil: Aracaju        |
| UFMG A826=CBS10465                                              | Carlos Rosa UFMG  | 1996              | Must of Brazilian cachaça;<br>Frozen pulp of Eugenia | Brazil: Belo Horizonte |
| UFMG R416=CBS10470                                              | Carlos Rosa UFMG  | 1999              | uniflora<br>Frozen pulp of Eugenia                   | Brazil: Aracaju        |
| UFMG R428=CBS10475                                              | Carlos Rosa UFMG  | 1999              | uniflora                                             | Brazil: Aracaju        |
| UFMG A1152=CBS10467                                             | Carlos Rosa UFMG  | 1996              | Must of Brazilian cachaça;<br>Frozen pulp of Eugenia | Brazil: Salinas        |
| UFMG R424=CBS10473                                              | Carlos Rosa UFMG  | 1999              | uniflora                                             | Brazil: Aracaju        |
| UFMG A571=CBS10463                                              | Carlos Rosa UFMG  | 1996              | Must of Brazilian cachaça;                           | Brazil: Belo Horizonte |
| UFMG A529=CBS10462                                              | Carlos Rosa UFMG  | 1996              | Must of Brazilian cachaça;                           | Brazil: Belo Horizonte |
| UFMG A1000=CBS10465                                             | Carlos Rosa UFMG  | 1996              | Must of Brazilian cachaça;<br>Frozen pulp of Eugenia | Brazil: Belo Horizonte |
| UFMG R427=CBS10474                                              | Carlos Rosa UFMG  | 1999              | uniflora<br>Frozen pulp of Eugenia                   | Brazil: Aracaju        |
| UFMG R437=CBS10477                                              | Carlos Rosa UFMG  | 1999              | uniflora<br>Frozen pulp of Eugenia                   | Brazil: Aracaju        |
| UFMG R418=CBS10471                                              | Carlos Rosa UFMG  | 1999              | uniflora                                             | Brazil: Aracaju        |
| UFMG A521=CBS10461                                              | Carlos Rosa UFMG  | 1996              | Must of Brazilian cachaça;                           | Brazil: Belo Horizonte |
| UFMG A738=CBS10464                                              | Carlos Rosa UFMG  | 1996              | Must of Brazilian cachaça;                           | Brazil: Belo Horizonte |
| NCYC 2387=DBVPG 6275 =<br>CBS5557 (T of Schiz.<br>malidevorans) | Steve James NCYC  | 11/11/1985        | Listan grapes                                        | Spain                  |
| NCYC 2355-1*                                                    | Steve James NCYC  | 1991              | Steve James NCYC                                     | Japan                  |

|                                                   |                          |               |                                                    |                       |
|---------------------------------------------------|--------------------------|---------------|----------------------------------------------------|-----------------------|
| CBS 356 =DBVPG6277 (T of Schiz. pombe var. pombe) | Steve James NCYC         | 1922          | Arak (aniseed-flavoured distilled alcoholic drink) | Eastern mediterranean |
| NCYC 380= CBS 10392                               | Steve James NCYC         | 1953          | Raw cane sugar                                     | Unknown               |
| NCYC 132= CBS 10391                               | Steve James NCYC         | 1921          | Millet Beer                                        |                       |
| NCYC 936= CBS 10394                               | Steve James NCYC         | 1979          | Toddy (Palm wine)                                  | Sri Lanka             |
| NCYC 683 = CBS 10393                              | Steve James NCYC         | 1966          | Fermenting apple juice                             | Unknown               |
| DBVPG6699-1*                                      | Gianni Litti             | 01/04/1990    | Lychee fruit                                       | Indochina             |
| Y0036                                             | Neil Jolly ARC Infruitec | unknown to us | Wine                                               | South Africa          |
| Y0037                                             | Neil Jolly ARC Infruitec | unknown to us | Wine                                               | South Africa          |
| CBS2628                                           | Steve James NCYC         | 1952          | Palm wine                                          | Pakistan              |
| CBS2775                                           | Steve James NCYC         | 1957          | Fermenting molasses                                | Japan                 |
| CBS5680=DBVPG6448                                 | Steve James NCYC         | 1965          | Apple                                              | Poland                |
| CBS5682=DBVPG6376                                 | Steve James NCYC         | 1965          | Bantu beer                                         | South Africa          |
| CBS7335                                           | Steve James NCYC         | 1988          | Alpechín                                           | Spain                 |
| NCYC535 = CBS 4100                                | Steve James NCYC         | 1959          | Unknown                                            | Unknown               |
| DBVPG2801                                         | Steve James NCYC         | 1939          | Lagby (drink from date Palm)                       | Tunisia               |
| DBVPG2804                                         | Steve James NCYC         | 1963          | Wine                                               | Malta                 |
| DBVPG2805                                         | Steve James NCYC         | 1963          | Wine                                               | Malta                 |
| DBVPG2806                                         | Steve James NCYC         | 1963          | Wine                                               | Malta                 |
| DBVPG2807                                         | Steve James NCYC         | 1963          | Grape must treated with SO2                        | Malta                 |
| DBVPG2808                                         | Steve James NCYC         | 1963          | Grape must treated with SO2                        | Malta                 |
| DBVPG2809                                         | Steve James NCYC         | 1963          | Grape must treated with SO2                        | Malta                 |
| DBVPG2810                                         | Steve James NCYC         | 1963          | Wine                                               | Malta                 |
| DBVPG2811                                         | Steve James NCYC         | 1966          | Grape must treated with SO2                        | Sicily, Italy         |
| DBVPG2812                                         | Steve James NCYC         | 1966          | Grape must treated with SO2                        | Sicily, Italy         |
| DBVPG2814                                         | Steve James NCYC         | 1966          | Grape must treated with SO2                        | Sicily, Italy         |
| DBVPG2815                                         | Steve James NCYC         | 1966          | Grape must treated with SO2                        | Sicily, Italy         |
| DBVPG2816                                         | Steve James NCYC         | 1966          | Grape must treated with SO2                        | Sicily, Italy         |
| DBVPG2817                                         | Steve James NCYC         | 1966          | Grape must treated with SO2                        | Sicily, Italy         |
| DBVPG2818                                         | Steve James NCYC         | 1966          | Grape must treated with SO2                        | Sicily, Italy         |
| DBVPG4433*                                        | Steve James NCYC         | 12/04/1996    | Unknown                                            | Germany               |
| DBVPG4435                                         | Steve James NCYC         | 12/04/1996    | Unknown                                            | Italy                 |
| DBVPG4437                                         | Steve James NCYC         | 12/04/1996    | Unknown                                            | Italy                 |
| DBVPG6610                                         | Steve James NCYC         | 08/08/1986    | Lab strain lys1                                    | Unknown               |
| Y468                                              | Gert Marais CAMS         | unknown to us | Cape wines                                         | South Africa          |
| Y469                                              | Gert Marais CAMS         | unknown to us | Unknown                                            | Unknown               |
| Y470                                              | Gert Marais CAMS         | unknown to us | Unknown                                            | Unknown               |
| Y831                                              | Gert Marais CAMS         | unknown to us | Industrial glucose;                                | South Africa          |
| Y832                                              | Gert Marais CAMS         | unknown to us | Industrial glucose:                                | South Africa          |
| CBS374 = DBVPG6418                                | Gert Marais CAMS         | 1928          | Molasses                                           | Delft                 |
| 972                                               | Jacky Hayles CRUK        | 1947          | Rotten wine                                        | France                |
| 975                                               | Jacky Hayles CRUK        | 1947          | Rotten wine                                        | France                |

|                                                  |                    |               |                        |                     |
|--------------------------------------------------|--------------------|---------------|------------------------|---------------------|
| DBVPG 6275 = CBS5557 (T of Sciz<br>maledivorans) | Steve James NCYC   | 11/11/1985    | Listan grapes          | Spain               |
| DBVPG6279= CBS1042 (T of Schiz.<br>liquefaciens) | Steve James NCYC   | 11/11/1985    | Sulfited grape juice   | Unknown             |
| DBVPG6281=CBS1061                                | Steve James NCYC   | 11/11/1985    | Cane-sugar molasses    | Unknown             |
| DBVPG6417=CBS355                                 | Steve James NCYC   | 10/16/1987    | Cane-sugar molasses    | Unknown             |
| DBVPG6447=CBS1043                                | Steve James NCYC   | 10/31/1987    | Cane-sugar molasses    | Unknown             |
| DBVPG 6449=CBS1062                               | Steve James NCYC   | 10/31/1987    | Cane-sugar molasses    | Unknown             |
| CBS358=DPVPG6374                                 | Vincent Robert CBS | 1922          | Unknown                | Unknown             |
| CBS2777                                          | Vincent Robert CBS | 1957          | Fermenting molasses    | Japan               |
| CBS1058                                          | Vincent Robert CBS | 1949          | Molasses               | Java, Indonesia     |
| CBS357=DBVPG6280                                 | Vincent Robert CBS | 1912          | Cane-sugar molasses    | Jamaica             |
| CBS2776                                          | Vincent Robert CBS | 1957          | Fermenting molasses    | Japan               |
| CBS 352= DBVPG 6373                              | Vincent Robert CBS | 1923          | Batavian arrak factory | Indonesia           |
| CBS1057= DBVPG6375                               | Vincent Robert CBS | 1933          | Brewer's yeast         | Skane, Sweden       |
| CBS1059                                          | Vincent Robert CBS | 1949          | Cane sugar             | Mauritius           |
| CBS1044                                          | Vincent Robert CBS | 1927          | Cane-sugar molasses    | Unknown             |
| L2470                                            | Giani Litti        | unknown to us | Wine                   | Chile               |
|                                                  | Eveline Bartowsky  |               |                        | Eden Valley, South  |
| AWRI141                                          | AWRI               | 25/06/1945    | Vineyard               | Australia           |
|                                                  | Eveline Bartowsky  |               |                        | McLaren Vale, South |
| AWRI442                                          | AWRI               | 1951          | Haslegrove Wines       | Australia           |
| CBS1063=DBVPG6450                                | Vincent Robert CBS | 1934          | Cane-sugar molasses    | Unknown             |
| Y468-subclone WRAB NOTT133                       |                    |               |                        |                     |
| Y468-subclone WRAB NOTT134                       |                    |               |                        |                     |
| Y468-subclone WRAB NOTT135                       |                    |               |                        |                     |
| Y468-subclone WRAB NOTT136                       |                    |               |                        |                     |
| Y470-subclone WRAB NOTT137                       |                    |               |                        |                     |
| Y470-subclone WRAB NOTT138                       |                    |               |                        |                     |
| Y470-subclone WRAB NOTT139                       |                    |               |                        |                     |
| Y470-subclone WRAB NOTT140                       |                    |               |                        |                     |
| Y831-subclone WRAB NOTT141                       |                    |               |                        |                     |
| Y831-subclone WRAB NOTT142                       |                    |               |                        |                     |
| Y832-subclone WRAB NOTT143                       |                    |               |                        |                     |
| Y832-subclone WRAB NOTT144                       |                    |               |                        |                     |
| Y832-subclone WRAB NOTT145                       |                    |               |                        |                     |
| Y832-subclone WRAB NOTT146                       |                    |               |                        |                     |
| Y468-subclone WRAB NOTT147                       |                    |               |                        |                     |
| CBS374-subclone WRAB NOTT148                     |                    |               |                        |                     |

\* DBVPG 6699 is listed as *Saccharomyces boulardi* however GL found the original isolate to be impure, sub-cloned it and found it to contain a yeast resembling *S. pombe* which we have listed here as DBVPG 6699-1. DBVPG 4433 is listed as *S. pombe* in the DBVPG catalogue which we have confirmed here, however it is also listed as being identical to NCYC 3092 which is listed as *Zygosaccharomyces*. We have not established the source of this discrepancy.
