# Supplementary material for: A Geographically Diverse Collection of Schizosaccharomyces pombe Isolates Shows Limited Phenotypic Variation but Extensive Karyotypic Diversity
Source: PubMed Central journal article supplement (PMC3276172; doi:10.1534/g3.111.001123), 2011-12-01
Supplement: supp_1.7.615_TableS2.pdf [file supp_1.7.615_TableS2.pdf]

**Table S2 Assorting 84 strains of *S. pombe* into 40 groups with shared haplotypes.**

| Strain                                                                                                                                         | hap. no.  | 660 | TER1 | TER1+30 | TER1+100 | CC2L | CC2R | CCC2 |
|------------------------------------------------------------------------------------------------------------------------------------------------|-----------|-----|------|---------|----------|------|------|------|
| UWOPS 92.229.4                                                                                                                                 | <b>1</b>  | 1   | 1    | 1       | 1        | 1    | 1    | 1    |
| <b>UWOPS 94.422.2</b>                                                                                                                          | <b>2</b>  | 2   | 2    | 2       | 1        | 1    | 1    | 1    |
| UFMG A529, UFMG 790, UFMG A826                                                                                                                 | <b>3</b>  | 3   | 3    | 3       | 1        | 1    | 2    | 1    |
| UFMG R416, UFMG R418, UFMG R420, UFMG R424,<br>UFMG R435                                                                                       | <b>4</b>  | 3   | 4    | 1       | 2        | 1    | 1    | 1    |
| UFMG R427                                                                                                                                      | <b>5</b>  | 3   | 4    | 1       | 2        | 2    | 3    | 3    |
| UFMG A1263                                                                                                                                     | <b>6</b>  | 3   | 5    | 3       | 1        | 1    | 2    | 1    |
| UFMG A521, UFMG A571, UFMG A602                                                                                                                | <b>7</b>  | 3   | 3    | 3       | 1        | 2    | 1    | 1    |
| UFMG A1000, UFMG A1153,                                                                                                                        | <b>8</b>  | 3   | 6    | 1       | 1        | 2    | 1    | 1    |
| UFMG R434                                                                                                                                      | <b>9</b>  | 3   | 6    | 1       | 2        | 3    | 1    | 2    |
| UFMG R428                                                                                                                                      | <b>10</b> | 3   | 7    | 2       | 2        | 2    | 3    | 1    |
| UFMG A1152                                                                                                                                     | <b>11</b> | 3   | 8    | 1       | 1        | 2    | 1    | 1    |
| UFMG R437                                                                                                                                      | <b>12</b> | 3   | 6    | 1       | 2        | 1    | 1    | 1    |
| UFMG A738                                                                                                                                      | <b>13</b> | 3   | 3    | 1       | 1        | 1    | 2    | 1    |
| NCYC 683, NCYC 2387, DBVPG4435, AWRI 442                                                                                                       | <b>14</b> | 4   | 6    | 1       | 1        | 1    | 1    | 1    |
| NCYC 936, NCYC 2355-1,                                                                                                                         | <b>15</b> | 3   | 9    | 4       | 1        | 4    | 4    | 4    |
| <b>CBS 356, NCYC 132, NCYC535, DBVPG2817,<br/>DBVPG4437, AWRI 141</b>                                                                          | <b>16</b> | 5   | 3    | 2       | 1        | 5    | 5    | 5    |
| NCYC 380, CBS 1063, <b>DBVPG 6281</b> , CBS 355,<br><b>DBVPG 6417</b>                                                                          | <b>17</b> | 3   | 6    | 1       | 2        | 2    | 1    | 1    |
| <u>DBVPG4433</u> , <u>DBVPG 6279</u> , <u>DBVPG6610</u> , <u>DBVPG 6699</u> ,<br>Y0036, Y0037, <u>CRUK 972</u> , <u>CRUK 975</u> , Y468, Y469, | <b>18</b> | 4   | 6    | 1       | 2        | 2    | 6    | 6    |
| CBS 2628                                                                                                                                       | <b>19</b> | 6   | 10   | 4       | 3        | 4    | 7    | 7    |
| CBS 2775, CBS 2776, <b>CBS 2777</b>                                                                                                            | <b>20</b> | 3   | 11   | 2       | 1        | 1    | 1    | 1    |
| CBS 5680                                                                                                                                       | <b>21</b> | 4   | 7    | 2       | 2        | 2    | 1    | 1    |
| CBS 5682                                                                                                                                       | <b>22</b> | 7   | 6    | 2       | 1        | 1    | 1    | 1    |
| CBS 7335                                                                                                                                       | <b>23</b> | 8   | 12   | 1       | 4        | 1    | 1    | 1    |
| DBVPG2801                                                                                                                                      | <b>24</b> | 3   | 3    | 1       | 5        | 2    | 3    | 8    |
| <u>DBVPG2805</u>                                                                                                                               | <b>25</b> | 3   | 6    | 1       | 2        | 2    | 6    | 6    |
| DBVPG2804, DBVPG2806, DBVPG2807, DBVPG2808,<br>DBVPG2809                                                                                       | <b>26</b> | 4   | 6    | 1       | 1        | 2    | 6    | 6    |
| DBVPG2810                                                                                                                                      | <b>27</b> | 4   | 13   | 5       | 1        | 2    | 6    | 6    |
| DBVPG2811, DBVPG2812, DBVPG2814, DBVPG2815,<br>DBVPG2816, DBVPG2818                                                                            | <b>28</b> | 4   | 6    | 1       | 4        | 2    | 6    | 6    |
| <b>Y470*</b>                                                                                                                                   | <b>29</b> | 4   | 6    | 5       | 1        | 1    | 6    | 1    |
| <b>Y831*, Y832*</b>                                                                                                                            | <b>30</b> | 3   | 6    | 2       | 1        | 2    | 6    | 9    |
| CBS374                                                                                                                                         | <b>31</b> | 3   | 7    | 2       | 2        | 2    | 6    | 6    |
| DBVPG 6447, DBVPG 6449                                                                                                                         | <b>32</b> | 3   | 6    | 2       | 1        | 2    | 1    | 1    |
| CBS 358                                                                                                                                        | <b>33</b> | 3   | 6    | 1       | 1        | 1    | 1    | 1    |

|          |           |   |    |   |   |   |   |    |
|----------|-----------|---|----|---|---|---|---|----|
| CBS 1058 | <b>34</b> | 4 | 6  | 1 | 1 | 2 | 3 | 10 |
| CBS 357  | <b>35</b> | 3 | 14 | 2 | 1 | 1 | 1 | 1  |
| CBS 352  | <b>36</b> | 9 | 15 | 6 | 1 | 1 | 1 | 1  |
| CBS 1057 | <b>37</b> | 4 | 6  | 1 | 2 | 2 | 1 | 1  |
| CBS 1059 | <b>38</b> | 4 | 6  | 1 | 2 | 1 | 1 | 1  |
| CBS 1044 | <b>39</b> | 3 | 16 | 1 | 1 | 2 | 1 | 1  |
| L2470    | <b>40</b> | 4 | 13 | 5 | 1 | 1 | 1 | 1  |

---

Highlighted in bold are strains that contain translocations detected in the survey. Underlined are strains with the 2.3Mb derived inversion of chromosome I originally identified in CRUK 972. The asterisks indicated strains containing mixtures of karyotypes.

## Sequences of haplotypes shown in table S2.

### 660.16 intron

>1

TAAAGCTACAATGATGTTAGCATATTCACATTCGATATGATACAAATAATGTTAAAAACAAGGAAAGGTTA  
ATGCTCATGAGCCCGGAAAGCAAGCAAAAAATAAAGACAAAATAATCATAAGTGTGAGTGACAGACAAA  
AACAAAGATGAACCGAAAACCTCCCGCGAGAGAATCTGATAACGAAATTTTTTACCCAACAAAACCGGAACGC  
CGTGCCATAACAAGTGAGAAAAACTAGGATTGTTTTTCTTACATGCAAAACTCGGACATTTTTTGATCAGC  
ATGCAAAAAATAGGGCGCGGGTAAAGAAAGAGACAAAAACAAATCGTCGGATAAGTTGATGAGTCATCGTTT  
TCGAGGGTTCGCTCGTTATCATAGACACATCTACGCTATAACAACACAAAAAGCATGGTAAATGGACAAAA  
CCAACACACGCGACTCACCTTACAACGTAGCGCAGTGAATAACGCAATAGCTATGCAAAACGTTATACCA  
ACAGAGCAAAAAACATTGTAAGAATACACATGCCCGACACAACGGATGGTTGCAAAGAAATCGAGAGTGAA  
ACCGCATCGATTACAAACAGGTTTTGAAGGAGCAAACCCGAAAGCAAGAGAAAAACCTTTCCCATAGCT  
ATGTGTTATGCCATATTGAAGAGTAGAAAATGGGAAAGAAATAGCATTTCTAATAAAGAAAGATACTTGT  
CTTTGCTTGCTTTCACTTCGATACAAATGTTTTATTATGTCTT

>2

TAAAGCTACAATGATGTTAGCATATTCACATTCGATATGATACAAATAATGTTAAAAACAAGGAAAGGTTA  
ATGCTCATGAGCCCGGAAAGCAAGCAAAAAATAAAGACAAAATAATCATAAGTGTGAGTGACAGACAAA  
AACAAAGATGAACCGAAAACCTCCCGCGAGAGAATCTGATAACGAAATTTTTTACCCAACAAAACCGGAACGC  
CGTGCCATAACAAGTGAGAAAAACTAGGATTGTTTTTCTTACATGCAAAACTCGGACATTTTTTGATCAGC  
ATGCAAAAAATAGGGCGCGGGTAAAGAAAGAGACAAAAACAAATCGTCGGATAAGTTGATGAGTCATCGTTT  
TCGAGGGTTCGCTCGTTATCATAGACACATCTACGCTATAACAACACAAAAAGCATGGTAAATGGACAAAA  
CCAACACACGCGACTCACCTTACAACGTAGCGCAGTGAATAACGCAATAGCTATGCAAAACGTTATACCA  
ACAGAGCAAAAAACATTGTAAGAATACACATGCCCGACACAACGGATGGTTGCAAAGAAATCGAGAGTGAA  
ACCGCATCGATTACAAACAGGTTTTGAAGGAGCAAACCCGAAAGCAAGAGAAAAACCTTTCCCATAGCT  
ATGTGTTATGCCATATTGAAGAGTAGAAAATGGGAAAGAAATAGCATTTCTAATAAAGAAAGAAACCTGT  
CTTTGCTTGCTTTCACTTCGATACAAATGTTTTATTATGTCTT

>3

TAAAGCTACAATGATGTTAGCATATTCACATTCGATATGATACAAATAATGTTAAAAACAAGGAAAGGTTA  
ATGCTCATGAGCCCGGAAAGCAAGCAAAAAATAAAGACAAAATAATCATAAGTGTGAGTGACAGACAAA  
AACAAAGATGAACCGAAAACCTCCCGCGAGAGAATCTGATAACGAAATTTTTTACCCAACAAAACCGGAACGC  
CGTGCCATAACAAGTGAGAAAAACTAGGATTGTTTTTCTTACATGCAAAACTCGGACATTTTTTGATCAGC  
ATGCAAAAAATAGGGCGCGGGTAAAGAAAGAGACAAAAACAAATCGTCGGATAAGTTGATGAGTCATCGTTT  
TCGAGGGTTCGCTCGTTATCATAGACACATCTACGCTATAACAACACAAAAAGCATGGTAAATGGACAAAA  
CCAACACACGCGACTCACCTTACAACGTAGCGCAGTGAATAACGCAATAGCTATGCAAAACGTTATACCA  
ACAGAGCAAAAAACATTGTAAGAATACACATGCCCGACACAACGGATGGTTGCAAAGAAATCGAGAGTGAA  
ACCGCATCGATTACAAACAGGTTTTGAAGGAGCAAACCCGAAAGCAAGAGAAAAACCTTTCCCATAGCT  
ATGTGTTATGCCATATTGAAGAGTAGAAAATGGGAAAGAAATAGCATTTCTAATAAAGAAAGAAACCTGT  
CTTTGCTTGCTTTCACTTCGATACAAATGTTTTATTATGTCTT

>4

TAAAGCTACAATGATGTTAGCATATTCACATTCGATATGATACAAATAATGTTAAAAACAAGGAAAGGTTA  
ATGCTCATGAGCCCGGAAAGCAAGCAAAAAATAAAGACAAAATAATCATAAGTGTGAGTGACAGACAAA  
AACAAAGATGAACCGAAAACCTCCCGCGAGAGAATCTGATAACGAAATTTTTTACCCAACAAAACCGGAACGC  
CGTGCCATAACAAGTGAGAAAAACTAGGATTGTTTTTCTTACATGCAAAACTCGGACATTTTTTGATCAGC  
ATGCAAAAAATAGGGCGCGGGTAAAGAAAGAGACAAAAACAAATCGTCGGATAAGTTGATGAGTCATCGTTT  
TCGAGGGTTCGCTCGTTATCATAGACACATCTACGCTATAACAACACAAAAAGCATGGTAAATGGACAAAA  
CCAACACACGCGACTCACCTTACAACGTAGCGCAGTGAATAACGCAATAGCTATGCAAAACGTTATACCA  
ACAGAGCAAAAAACATTGTAAGAATACACATGCCCGACACAACGGATGGTTGCAAAGAAATCGAGAGTGAA  
ACCGCATCGATTACAAACAGGTTTTGAAGGAGCAAACCCGAAAGCAAGAGAAAAACCTTTCCCATAGCT  
ATGTGTTATGCCATATTGAAGAGTAGAAAATGGGAAAGAAATAGCATTTCTAATAAAGAAAGAAACCTGT  
CTTTGCTTGCTTTCACTTCGATACAAATGTTTTATTATGTCTT

>5

TAAAGCTACAATGATGTTAGCATATTCACATTCGATATGATACAAATAATGTTAAAAACAAGGAAAGGTTA  
ATGCTCATGAGCCCGGAAAGCAAGCAAAAAATAAAGACAAAATAATCATAAGTGTGAGTGACAGACAAA  
AACAAAGATGAACCGAAAACCTCCCGCGAGAGAAATCTGATAACGAAATTTTTACCCAACAAACCGGAACGC  
CGTGCCATAACAAGTGAGAAAAACTAGGATTGTTTTTCTTACATGCAAAACTCGGACATTTTTGATCACG  
ATGCAAAAAATAGGGCGCGGGTAAGAAAGAGACAAAAACAAATCGTCGGATAAGTTGATGAGTCATCGTTT  
TCGAGGGTTCGCTCGTTATCATAGACACATCTACGCTATAACAACACAAAAAGCATGGTAAATGGACAAAA  
CCAACACACGCGACTCACCTTACAACGTAGCGCAGTGAATAACGCAATAGCTATGCAAAACGTTATACCA  
ACAGAGCAAAAAACATTGTAAGAAATACACATGCCCGACACAACGGATGGTTGCAAAGAAAATCGAGAGTGAA  
ACCGCATCGATTACAAACAGGTTTTGAAGGAGCAAACCCGAAAGCAAGAGAAAAACCTTTCCCATAGCT  
ATGTGTTATGCCATATTGAAGAGTAGAAAATGGGAAAGAAATAGCATTTCTAATAAAGAAAGAAACCTGT  
CTTTGCTTGCTTTCACTTCGATACAAATGTTTTATTATGTCTT

>6

TAAAGCTACAATGATGTTAGCATATTCACATTCGATATAATACAAATAATGTTAAAAACAAGGAAATGTTA  
ATGCTCATGAGCCCGGAAAGCAAGCAAAAAATAAAGACAAAATAATCATAAGTGTGAGTGACAGACAAA  
AACAAAGATGAACCGAAAACCTCCCGCGAGAGAAATCTGATAACGAAATTTTTACCCAACAAACCGGAACGC  
CGTGCCATAACAAGTGAGAAAAACTAGGATTGTTTTTCTTACATGCAAAACTCGAACATTTTTGATCACG  
ATGCAAAAAATAGGGCGCGGGTAAGAAAGAGACAAAAACAAATCGTCGGATAAGTTGATGAGTCATCGTTT  
TCGAGGGTTCGCTCGTTATCATAGACACATCTACGCTATAACAACACAAAAAGCATGGTAAATGGACAAAA  
CCAACACACGCGACTCACCTTACAACGTAGCGCAGTGAATAACGCAATAGCTATGCAAAACGTTATACCA  
ACAGAGCAAAAAACATTGTAAGAAATACACATGCCCGACACAACGGATGGTTGCAAAGAAAATCGAGAGTGAA  
ACCGCATCGATTACAAACAGGTTTTGAAGGAGCAAACCCGAAAGCAAGAGAAAAACCTTTCCCATAGCT  
ATGTGTTATGCCATATTGAAGAGTAGAAAATGGGAAAGAAATAGCATTTCTAATAAAGAAAGAAACCTGT  
CTTTGCTTGCTTTCACTTCGATACAAATGTTTTATTATGTCTT

>7

TAAAGCTACAATGATGTTAGCATATTCACATTCGATATGATACAAATAATGTTAAAAACAAGGAAAGGTTA  
ATGCTCATGAGCCCGGAAAGCAAGCAAAAAATAAAGACAAAATAATCATAAGTGTGAGTGACAGACAAA  
AACAAAGATGAACCGAAAACCTCCCGCGAGAGAAATCTGATAACGAAATTTTTACCCAACAAACCGGAATGC  
CGTGCCATAACAAGTGAGAAAAGCTAGGATTGTTTTTCTTACATGCAAAACTCGGACATTTTTGATCACG  
ATGCAAAAAATAGGGCGCGGGTAAGAAAGAGACAAAAACAAATCGTCGGATAAGTTGATGAGTCATCGTTT  
TCGAGGGTTCGCTCGTTATCATAGACACATCTACGCTATAACAACACAAAAAGCATGGTAAATGGACAAAA  
CCAACACACGCGACTCACCTTACAACGTAGCGCAGTGAATAACGCAATAGCTATGCAAAACGTTATACCA  
ACAGAGCAAAAAACATTGTAAGAAATACACATGCCCGACACAACGGATGGTTGCAAAGAAAATCGAGAGTGAA  
ACCGCATCGATTACAAACAGGTTTTGAAGGAGCAAACCCGAAAGCAAGAGAAAAACCTTTCCCATAGCT  
ATGTGTTATGCCATATCGAAGAGTAGAAAATGGGAAAGAAATAGCATTTCTAATAAAGAAAGAAACCTGT  
CTTTGCTTGCTTTCACTTCGATACAAATGTTTTATTATGTCTT

>8

TAAAGCTACAATGATGTTAGCATATTCACATTCGATATGATACAAATAATGTTAAAAACAAGGAAAGGTTA  
ATGCTCATGAGCCCGGAAAGCAAGCAAAAAATAAAGACAAAATAATCATAAGTGTGAGTGACAGACAAA  
AACAAAGATGAACCGAAAACCTCCCGCGAGAGAAATCTGATAACGAAATTTTTACCCAACAAACCGGAACGC  
CGTGCCATAACAATGAGAAAAACTAGGATTGTTTTTCTTACATGCAAAACTCGGACATTTTTGATCACG  
ATGCAAAAAATAGGGCGCGGGTAAGAAAGAGACAAAAACAAATCGTCGGATAAGTTGATGAGTCATCGTTT  
TCGAGGGTTCGCTCGTTATCATAGACACATCTACGCTATAACAACACAAAAAGCATGGTAAATGGACAAAA  
CCAACACACGCGACTCACCTTACAACGTAGCGCAGTGAATAACGCAATAGCTATGCAAAACGTTATACCA  
ACAGAGCAAAAAACATTGTAAGAAATACACATGCCCGACACAACGGATGGTTGCAAAGAAAATCGAGAGTGAA  
ACCGCATCGATTACAAACAGGTTTTGAAGGAGCAAACCCGAAAGCAAGAGAAAAACCTTTCCCATAGCT  
ATGTGTTATGCCATATTGAAGAGTAGAAAATGGGAAAGAAATAGCATTTCTAATAAAGAAAGAAACCTGT  
CTTTGCTTGCTTTCACTTCGATACAAATGTTTTATTATGTCTT

>9

TAAAGCTACAATGATGTTAGCATATTCACATTCGATATAATACAAATAATGTTAAAAACAAGGAAATGTTA

ATGCTCATGAGCCCGGAAAGCAAGCAAAAAATAAGACAAAATAATCATAAGTGTGAGTGACAGACAAA  
AACAAAGATGAACCGAAAACCTCCCGCGAGAGAATCTGATAACGAAATTTTTACCCAACAAACCGGAACGC  
CGTGCCATAACAAGTGAGAAAACTAGGATTGTTTTCTTACATGCAAAACTCGAACATTTTTGATCAGC  
ATGCAAAAATAGGGCGCGGGTAAGAAAGAGACAAAACAATCGTCGGATAAGTTGATGAGTCATCGTTTT  
TCGAGGGTTCGCTCGTTATCATAGACACATCTACGCTATAACAACACAAAAGCATGGTAAATGGACAAAA  
CCAACACACGCGACTCACCTTACAACGTAGCGCAGTGAATAACGCAATAGCTATGCAACGTTATACCA  
ACAGAGCAAAAACATTGTAAGAATACACATGCCCGACACAACGGATGGTTGCAAAGAAATCGAGAGTGAA  
ACCGCATCGATTACAAACAGGTTTTGAAGGAGCAAACCCGAAAGCAAGAGAAAAACCTTTCCCATAGCT  
ATGTGTTATGCCATATTGAAGAGTAGAAAATGGGAAAGAAATAGCATTTCTAATAAAGAAAGAGACCTGT  
CTTTGCTTGCTTTCACTTCGATACAAATGTTTTATTATGTCTT

## TER1

>1

ACAGATACAATTAAGAATAACTTGTAATGGTATTCACATTACTAATAAACTTCTTAATTCGTCTGTTTTGG  
GTATTCATTACATATTCATCAACTAAGCAAGTCTTACATGCGTCCAAATTTGTTAAGACAAGAAAATAT  
ACCATCTATGCTTAATAAAACAACTTCATCTCTTCTAGTACGCAATAAATACATTAATTTATTTTACA  
TTATAATAAGATTTCATCACTTTCTCAAAATTTTGAACCCGAAACCGAATTCAGCATGTTTTAATAAAAA  
GATGAGCAACCGCGTCTTACTAAAACGCAATTCATAAATTTGGGAATTGTAGTTAGTAATTTTAAAT  
TTAATCATTAATAACATACCAAAAAATGGGCCCGTTCTTTTTAACATTTTGCTCAGACCAAGTGAAAAAA  
CCTAAAACGCGCTCAAGAGGAACAACGGACGAGCTACACTCAAATATTAATGAATGGGTAGTCAACTAT  
TTTACTGGCGAACAAGCAAAAAGCTTTGATCCATGGATCTCACGTAATGTAAAATAGTATCTTCCCTAAGC  
ATTATTTATTTGAGAAACAGGACGTTTATTATTGTTTGCCGCAAAGAATCCAAGTTCAAGGAAATGAAT  
ACAGACAAGAGTTGCTATTCGTTTGAATGTACATTGTGACCACAAGTCGGTTTTTGTTCCTTCCAAATA  
GTACCTTCAACACGAAGTTGTACATTTAGCACGGACAAGAATCGACCAAAAAACCAAAATTAATGTAG  
AAGGAAAACCTTCAAGTCATTTTTTTTTATAATAGCTCTTTTAAGTTCCATACTTTTTTATCTCCGTAACAA  
ATGCCAAAAGAAGCTAGTATAGACGAGAGCATTACGCCAACAAATTTGCACAAGCAAAAAATGTTACCAA  
TACAATTTAATATTTGTATGGGGAATTGAACTATCTATAAACTTTCTTCATTGCTTGATTTTTAGTAA  
CCTTCAGTAATCAAACGAGACTCTTCTACCAAAAATTCGTTGTGATCTGACAAGCACTTAAATGATGGAT  
ACAGAATTTATACAAAAGAAAGGTAGGATTAACCTGTAATGAACTTTAAAGGCAGAAGACTCACGTACA  
CTACACCCAGCGATTCAATTGATGTCCAGGCCTCTTTTTTCTACTGTATACAGAAGTATGAAGTCTGCA  
GCCATAATAAAAGCGGTAGGAATGATCTATGTTTTCCGCAACGCGTCAACGATTCCATGAAGAGCCTCTC  
TTATGAATGTTCTAATGATCAAACTCTAAAAAAGCTAAAAAGAATAATTTTCGCAATGCTGAAAAGTT  
GAAGAGTACGGTTACACGAAGCAGTACAGGAATTCGAAATCCATCGAAAACAACATCCAGACAAACTGA  
AAAGCTAAACAGACTACTCGTCTTTCTAGTAGACAGTATACAGTTTTTGAATAGCAAACTATACTTAA  
GGCCTATGAATCATTTCTTCAAACCTTCAAATCAATCACCAAGTCCTCAAGAACCCTTTGATTAATTTT  
CCTTGTCAACCTTCTAAGCATGGGCGTTGCGTTGAGTATAAACAAAACAGCAATAAATCCGAGTATACAT  
GAATTGTTTTCTTCTCAAACAAAACGCTGTTACCTTTGCGCGTATGATGACTTCCCATACTTACAAAA  
TTTTCAAACCTAATA

>2

ACAGATACAATTAAGAATAACTTGTAATGGTATTCACATTACTAATAAACTTCTTAATTCATCTGTTTTGG  
GTATTCATTACATATTCATCAACTAAGCAAGTCTTACATGCGTCCAAATTTGTTAAGACAAGAAAATAT  
ACCATCTATGCTTAATAAAACAACTTCATCTCTTCTAGTACGCAATAAATACATTAATTTATTTTACA  
TTATAATAAGATTTCATCACTTTCTCAAAATTTTGAACCCGAAACCGAATTCAGCATGTTTTAATAAAAA  
GATGAGCAACCGCGTCTTACTAAAACGCAATTCATAAATTTGGGAATTGTAGTTAGTAATTTTAAAT  
TTAATCATTAATAACATACCAAAAAATGGGCCCGTTCTTTTTAACATTTTGCTCAGACCAAGTGAAAAAA  
CCTAAAACGCGCTCAAGAGGAACAACGGACGAGCTACACTCAAATATTAATGAATGGGTAGTCAACTAT  
TTTACTAGCGAACAAGCAAAAAGCTTTGATCCATGGATCTCACGTAATGTAAAATAGTATCTTCCCTAAGC  
ATTAATTTATTTGAGAAACAGGACGTTTATTATTGTTTGCCGCAAAGAATCCAAGTTCAAGGAAATGAAT  
ACAGACAAGAGTTGCTATTCGTTTGAATGTACATTGTGACCACAAGTCGGTTTTTGTTCCTTCCAAATA  
GTACCTTCAACACGAAGTTGTACATTTAGCACGGACAAGAATCGACCAAAAAACCAAAATTAATGTAG  
AAGGAAAACCTTCAAGTCATTTTTTTTTATAATAGCTCTTTTAAGTTCCATACTTTTTTATCTCCGTAACAA  
ATGCCAAAAGAAGCTAGTATAGACGAGAGCATTACGCCAACAAATTTGCACAAGCAAAAAATGTTACCAA  
TACAATTTAATATTTGTATGGGGAATTGAACTATCTATAAACTTTCTTCATTGCTTGATTTTTAGTAA  
CCTTCAGTAATCAAACGAGACTCTTCTACCAAAAATTCGTTGTGATCTGACAAGCACTTAAATGATGGAT  
ACAGAATTTATACAAAAGAAAGGTAGGATTAACCTGTAATGAACTTTAAAGGCAGAAGACTCACGTACA

CTACACCCAGCGATTCAATTGATGTCCAGGCCTCTTTTTTCTACTGTATACAGAAGTATGAAGTCTGCA  
GCCATAATAAAAAGCGGTAGGAATGATCTATGTTTTCCGCAACGCGTCAACGATTCCATGAAGAGCCTCTC  
TTATGAATGTTCTAATGATCAAACTCTAAAAAAGCTAAAAAGAATAATTTTCGCAATGCTGAAAAGTT  
GAAGAGTACGGTTACACGAAGCAGTACAGGAATTCGAAATCCATCGAAAACAACATCCAGACAACTGA  
AAAGCTAAACAGACTACTCGTTCCTTCTAGTAGACAGTATACAGGTTTTGGAATAGCAAACATATACTTAA  
GGCCTATGAATCATTTCCTTCAAACTTTCAAATCAATCACCAAGTCCTCAAGAACCCTTTGATTAATTTT  
CCTTGTCAACCTTCTAAGCATGGGCGTTGCGTTGAGTATAAACAAAACAGCAATAAATCCGAGTATACAT  
GAATTGTTTTCTTCTTCAAACAAAACGCTGTTACCTTTGCGCGTATGATGACTTCCCATACTTACAAAAA  
TTTTCAAACCTAATA

>3

ACAGATACAATTAAGAATAACTTGTAATGGTATTCACATTACTAATAAACTTCTAAATTCATCTGTTTGG  
GTATTCATTACATATTCATCAACTAAGCAAGTCTTACATGCGTCCAAATTTGTTTAAGACAAGAAAAATAT  
ACCATCTATGCTTAATAAACAAACTTCATCTCTTCTAGTACGCAAATAAATACATTAATTTATTTTACA  
TTATAATAAGATTTCATCACTTTCTCAAAAATTTTGAACCGGAAACGGAATTCAGCATGTTTAAATAAAAA  
GATGAGCAACCGCGTTCCTTACTAAATACGCAATTCCTAATAATTTGGGAATTTAGTATGTTTAAAT  
TTAATCATTAATAACATACCAAAAAATGGGCCGTTTCTTTTTAACATTTTGTCTCAGACCAAGTAAAAAAA  
CCTAAAACGCGCTCAAGAGGAACAACGGACGAGCTACACTCAAATATTAATGAATGGGTAGTCAACTAT  
TTTACTAGCGAACAAGCAAAAAGCTTTGATCCATGGATCTCACGTAATGTAAAATAGTATCTTCCC  
TAAGC  
ATTATTTATTTGAGAAAACAGGACGTTTATTATGTTTGCCGCAAAGAATCCAAGTTCAAGGAAATG  
AAT  
ACAGACAAGAGTTGCTATTCGTTTGAATGTACATTGTGACCACAAGTCGGTTTTTGTTCCTTCCAAATA  
GTACCTTCAACACGAAGTTGTACATTTAGCACGGACAAGAATCGACCAAAAAACCAAAATTAATGTAG  
AAGGAAAACCTTCAAGTCATTTTTTTTTATAATAGCTCTTTAAGTTCCATACTTTTTATCTCCGTAACAA  
ATGCCAAAAGAAGCTAGTATAGACGAGAGCATTACGCCAACAAATTTGCACAAGCAAAAAATGTTACCAA  
TACAATTTAATATTTGTATGGGGAATGAACTATCTATAAACTTTCTTCATTGCTTGATTTTTAGTAA  
CCTTCAGTAATCAAACGAGACTCTTCTACCAAAAATTCGTTGTGATCTGACAAGCACTTAAATGATGGAT  
ACAGAATTTATACAAATGAAAGGTAGGATTAAACTGTAAATGAACCTTTAAAGGCAGAAGACTCACGTACA  
CTACACCCAGCGATTCAATTGATGTCCAGGCCTCTTTTTTCTACTGTATACAGAAGTATGAAGTCTGCA  
GCCATAATAAAAAGCGGTAGGAATGATCTATGTTTTCCGCAACGCGTCAACGATTCCATGAAGAGCCTCTC  
TTATGAATGTTCTAATGATCAAACTCTAAAAAAGCTAAAAAGAATAATTTTCGCAATGCTGAAAAGTT  
GAAGAGTACGGTTACACGAAGCAGTACAGGAATTCGAAATCCATCGAAAACAACATCCAGACAACTGA  
AAAGCTAAACAGACTACTCGTTCCTTCTAGTAGACAGTATACAGGTTTTGGAATAGCAAACATATACTTAA  
GGCCTATGAATCATTTCCTTCAAACTTTCAAATCAATCACCAAGTCCTCAAGAACCCTTTGATTAATTTT  
CCTTGTCAACCTTCTAAGCATGGGCGTTGCGTTGAGTATAAACAAAACAGCAATAAATCCGAGTATACAT  
GAATTGTTTTCTTCTTCAAACAAAACGCTGTTACCTTTGCGCGTATGATGACTTCCCATACTTACAAAAA  
TTTTCAAACCTAATA

>4

ACAGATACAATTAAGAATAACTTGTAATGGTATTCACATTACTAATAAACTTCTAAATTCATCTGTTTGG  
GTATTCATTACATATTCATCAACTAAGCAAGTCTTACATGCGTCCAAATTTGTTTAAGACAAGAAAAATAT  
ACCATCTATGCTTAATAAACAAACTTCATCTCTTCTAGTACGCAAATAAATACATTAATTTATTTTACA  
TTATAATAAGATTTCATCACTTTCTCAAAAATTTTGAACCGGAAACGGAATTCAGCATGTTTAAATAAAAA  
GATGAGCAACCGCGTTCCTTACTAAATACGCAATTCCTGATAATTTGGGAATTTAGTATGTTTAAAT  
TTAATCATTAATAACATACCAAAAAATGGGCCGTTTCTTTTTAACATTTTGTCTCAGACCAAGTAAAAAAA  
CCTAAAACGCGCTCAAGAGGAACAACGGACGAGCTACACTCAAATATTAATGAATGGGTAGTCAACTAT  
TTTACTAGCGAACAAGCAAAAAGCTTTGATCCATGGATCTCACGTAATGTAAAATAGTATCTTCCC  
TAAGC  
ATTATTTTTTTGAGAAAACAGGACGTTTATTATGTTTGCCGCAAAGAATCCAAGTTCAAGGAAATG  
AAT  
ACAGACCAGAGTTGCTATTCGTTTGAATGTACATTGTGACCACAAGTCGGTTTTTGTTCCTTCCAAATA  
GTACCTTCAACACGAAGTTGTACATTTAGCACGGACAAGAATCGACCAAAAAACCAAAATTAATGTAG  
AAGGAAAACCTTCAAGTCATTTTTTTTTATAATAGCTCTTTAAGTTCCATACTTTTTATCTCCGTAACAA  
ATGCCAAAAGAAGCTAGTATAGACGAGAGCATTACGCCAACAAATTTGCACAAGCAAAAAATGTTACCAA  
TACAATTTAATATTTGTATGGGGAATGAACTATCTATAAACTTTCTTCATTGCTTGATTTTTAGTAA  
CGTTCAGTAATCAAACGAGACTCTTCTACCAAAAATTCGTTGTGATCTGACAAGCACTTAAATGATGGAT  
ACAGATTTTATACAAATGAAAGGTAGGATTAAACTGTAAATGAATTTTAAAGGCAGAAGACTCACGTACA  
CTGCACCCAGCGATTCAATTGATGTCCAGGCCTCTTTTTTCTACTGTATACAGAAGTATGAAGTCTGCA  
GCCATAATAAAAAGCGGTAGGAATGATCTATGTTTTCCGCAACGCGTCAACGATTCCATGAAGAGCCTCTC  
TTATGAATATTCCTAATGATCAAACTCTAAAAAAGCTAAAAAGAATAATTTTCGCAATGCTGAAAAGTT  
GAAGAGTACGGTTACACGAAGCAGTACAGGAATTCGAAATCCATCGAAAACAACATCCAGACAACTGA

AAAGCTAAACAGACTACTCGTTCCTTCTAGTAGACAGTATACAGGTTTTGGAATAGCAAACCTATACTTAA  
GGCCTATGAATCATTTCCCTCAAACCTTCAAATCAATCACCAAGCCCTCAAGAACCCTTGATTAATTTT  
CCTTGTCAACCTTCTAAGCATGGGCGTTGCGTTGAGTATAAAACAAAACAGCAATAAATCCGAGTATACAT  
GAATTGTTTTCTTCTCAAACAAAACGCTGTTACCTTTGCGCGTATGATGACTTCCCATACTTACAAAA  
TTTTCAAACCTAACA

>5

ACAGATACAATTAAGAATAACTTGTAATGGTATTCACATTACTAATAAACTTCTAAATTCATCTGTTTGG  
GTATTCATTACATATTCATCAACTAAGCAAGTCTTACATGCGTCCAAATTTGTTTAAAGACAAGAAAATAT  
ACCATCTATGCTTAATAAAACAACTTCATCTCTTCTAGTAGCGAAATAAATACATTAATTTATTTTACA  
TTATAATAAGATTATCACTTTCTCAAATTTTGAACCCGAAACCGAATTCAGCATGTTTTAATAAAAA  
GATGAGCAACCGCGTCTTACTAAATACGCAATTCGATAATTTGGGAATTGTAGTTAGTAATTTTAAAT  
TTAATCATTAATAACATACCAAAAAATGGGCCCGTTCCTTTTAAACATTTTGCTCAGACCAAGTGA  
CCTAAAACGCGCTCAAGAGGAACAACGGACGAGCTACACTCAAATATTAATGAATGGGTAGTCAACTAT  
TTTACTAGCGAACAAGCAAAAAGCTTTGATCCATGGATCTCACGTAATGTAAAATAGTATCTTCCCTAAGC  
ATTATTTTTTTGAGAAACAGGACGTTTATTATTGTTTGCCGCAAAGAATCCAAGTTCAAGGAAATGAAT  
ACAGACCAGAGTTGCTATTCGTTTGAATGTACATTGTGACCACAAGTCGGTTTTTGTTCCTTCCAAATA  
GTACCTTCAACACGAAGTTGTACATTTAGCACGGACAAGAATCGACCAAAAAACCAAAATTAATGTAG  
AAGGAAAACCTTCAAGTCATTTTTTTTTATAATAGCTCTTTTAAAGTTCCATACTTTTTTATCTCCGTAACAA  
ATGCCAAAAGAAGCTAGTATAGACGAGAGCATTACAGCCAACAAATTTGCACAAGCAAAAAATGTTACCAA  
TACAATTTAATATTTGTATGGGGAAATGAACTATCTATAAACTTTCTTTCATTGCTTGATTTTTAGTAA  
CGTTCAGTAATCAAACGAGACTCTTCTACCAAAAATTCGTTGTGATCTGACAAGCACTTAAATGATGGAT  
ACAGATTTTATACAAATGAAAGGTAGGATTAACGTAAATGAATTTTAAAGGCAGAAGACTCACGTACA  
CTGCACCCAGCGATTCAATGATGTCCAGGCCTCTTTTTTCTACTGTATACAGAAGTATGAAGTCTGCA  
GCCATAATAAAAGCGGTAGGAATGATCTATGTTTTCCGCAACGCGTCAACGATTCCATGAAGAGCCTCTC  
TTATGAATATTTCTAATGATCAAACTCTAAAAAAGCTAAAAAGAATAATTTGCAATGCTGAAAAGTT  
GAAGAGTACGGTTACACGAAGCAGTACAGGAATTCGAAATCCATCGAAAACAACATCCAGACAAACTGA  
AAAGCTAAACAGACTACTCGTTCCTTCTAGTAGACAGTATACAGGTTTTGGAATAGCAAACTATACTTAA  
GGCCTATGAATCATTTCCCTCAAACCTTCAAATCAATCACCAAGCCCTCAAGAACCCTTGATTAATTTT  
CCTTGTCAACCTTCTAAGCATGGGCGTTGCGTTGAGTATAAAACAAAACAGCAATAAATCCGAGTATACAT  
GAATTGTTTTCTTCTCAAACAAAACGCTGTTACCTTTGCGCGTATGATGACTTCCCATACTTACAAAA  
TTTTCAAACCTAACA

>6

ACAGATACAATTAAGAATAACTTGTAATGGTATTCACATTACTAATAAACTTCTAAATTCATCTGTTTGG  
GTATTCATTACATATTCATCAACTAAGCAAGTCTTACATGCGTCCAAATTTGTTTAAAGACAAGAAAATAT  
ACCATCTATGCTTAATAAAACAACTTCATCTCTTCTAGTAGCGAAATAAATACATTAATTTATTTTACA  
TTATAATAAGATTATCACTTTCTCAAATTTTGAACCCGAAACCGAATTCAGCATGTTTTAATAAAAA  
GATGAGCAACCGCGTCTTACTAAATACGCAATTCGATAATTTGGGAATTGTAGTTAGTAATTTTAAAT  
TTAATCATTAATAACATACCAAAAAATGGGCCCGTTCCTTTTAAACATTTTGCTCAGACCAAGTGA  
CCTAAAACGCGCTCAAGAGGAACAACGGACGAGCTACACTCAAATATTAATGAATGGGTACTCAACTAT  
TTTACTAGCGAACAAGCAAAAAGCTTTGATCCATGGATCTCACGTAATGTAAAATAGTATCTTCCCTAAGC  
ATTATTTATTTGAGAAACAGGACGTTTATTATTGTTTGCCGCAAAGAATCCAAGTTCAAGGAAATGAAT  
ACAGACAAGAGTTGCTATTCGTTTGAATGTACATTGTGACCACAAGTCGGTTTTTGTTCCTTCCAAATA  
GTACCTTCAACACGAAGTTGTACATTTAGCACGGACAAGAATCGACCAAAAAACCAAAATTAATGTAG  
AAGGAAAACCTTCAAGTCATTTTTTTTTATAATAGCTCTTTTAAAGTTCCATACTTTTTTATCTCCGTAACAA  
ATGCCAAAAGAAGCTAGTATAGACGAGAGCATTACAGCCAACAAATTTGCACAAGCAAAAAATGTTACCAA  
TACAATTTAATATTTGTATGGGGAAATGAACTATCTATAAACTTTCTTTCATTGCTTGATTTTTAGTAA  
CCTTCAGTAATCAAACGAGACTCTTCTACCAAGAATTCGTTGTGATCTGACAAGCACTTAAATGATGGAT  
ACAGAATTTATACAAATGAAAGGTAGGATTAACGTAAATGAATTTAAAGGCAGAAGACTCACGTACA  
CTACACCCAGCGATTCAATGATGTCCAGGCCTCTTTTTTCTACTGTATACAGAAGTATGAAGTCTGCA  
GCCATAATAAAAGCGGTAGGAATGATCTATGTTTTCCGCAACGCGTCAACGATTCCATGAAGAGCCTCTC  
TTATGAATGTTCTAATGATCAAACTCTAAAAAAGCTAAAAAGAATAATTTGCAATGCTGAAAAGTT  
GAAGAGTACGGTTACACGAAGCAGTACAGGAATTCGAAATCCATCGAAAACAACATCCAGACAAACTGA  
AAAGCTAAACAGACTACTCGTTCCTTCTAGTAGACAGTATACAGGTTTTGGAATAGCAAACCTATACTTAA  
GGCCTATGAATCATTTCCCTCAAACCTTCAAATCAATCACCAAGTCCTCAAGAACCCTTGATTAATTTT  
CCTTGTCAACCTTCTAAGCATGGGCGTTGCGTTGAGTATAAAACAAAACAGCAATAAATCCGAGTATACAT  
GAATTGTTTTCTTCTCAAACAAAACGCTGTTACCTTTGCGCGTATGATGACTTCCCATACTTACAAAA

TTTTCAAACCTAATA

>7

ACAGATACAATTAAGAATAACTTGTAATGGTATTACATTACTAATAAACTTCTAAATTCATCTGTTTGG  
GTATTCATTACATATTCATCAACTAAGCAAGTCTTACATGCGTCCAAATTTGCTTAAGACAAGAAAATAT  
ACCATCTATGCTTAATAAAACAACTTCATCTCTTCTAGTACGCAAATAAATACATTAATTTATTTTACA  
TTATAATAAGATTTCATCACTTTCTCAAAATTTTGAAACCGGAAACGGAATTCAGCATGTTTAAATAAAAA  
GATGAGCAACCGCGTTTCGTACTAAATACGCAATTCCTAATAATTTGGGAATTGTAGTTAGTAATTTTAAAT  
TTAATCATTAATAACATACCAAAAAATGGGCCGCTTCTTTTAAACATTTTGCTCAGACCAAGTGAAAAAA  
CCTAAAACGCGCTCAAGAGGAACAACGGACGAGCTACACTCAAAATATTAATGAATGGGTAGTCAACTAT  
TTTACTAGCGAACAAGCAAAAAGCTTTGATCCATGGATCTCACGTAATGTAAAATAGTATCTTCCCTAAGC  
ATTATTTATTTGAGAAACAGGACGTTTATTATTGTTTGCCGCAAAGAATCCAAGTTCAGGAAAATGAAT  
ACAGACAAGAGTTGCTATTCGTTTGAATGTACATTGTGACCACAAGTCGGTTTTTGTTCCTTCCAAATA  
GTACCTTCAACACGAAGTTGTACATTTAGCACGGACAAGAATCGACCAAAAAACCAAAATTAATGTAG  
AAGGAAAACCTTCAAGTCATTTTTTTTTATAATAGCTCTTTTAAGTTCCATACTTTTTATCTCCGTAAACAA  
ATGCCAAAAGAAGCTAGTATAGACGAGAGCATTAGCCAAACAAATTTGCACAAGCAAAAAATCGTTACCAA  
TACAATTTAATATTTGTATGGGGAATTGAACTATCTATAAACTTTCTTTCATTGCTTGATTTTAGTAA  
CCTTCAGTAATCAAACAAGACTCTTCTACCAAAAATTCGTTGTGATCTGACAAGCACTTAAATGATGGAT  
ACAGAATTTATACAAATGAAAGGTAGGATTAAACTGTAAATGAATTTTAAAGGCAGAAGACTCACGTACA  
CTACACCCAGCGATTCAATTGATGTCCAGGCCTCTTTTTCCCTACTGTATACAGAAGTATGAAGTCTGCA  
GCCATAATAAAAGCGGTAGGAATGATCTATGTTTTCCGCAACGCGTCAACGATTCCATGAAGAGCCTCTC  
TTATGAATGTTCCCTAATGATCAAACTCTAAAAAAGCTAAAAAGAATAATTTTCGCAATGCTGAGAAGTT  
GAAGAGTACGGTTACACGAAGCAGTACAGGAATTCGAAATCCATCGAAAACAACCTATCCAGACAACTGA  
AAAGCTAAACAGACTACTCGTTCCTTCTAGTAGACAGTATACAGGTTTTGGAATAGCAAACCTATACTTAA  
GGCCTATGAATCATTTCCCTCAAACCTTCAAATCAATCACCAAGCCCTCAAGAACCCTTGATTAATTTT  
CCTTGTCAACCTTCTAAGCATGGGCGTTGCGTTGAGTATAAACAAAACAGCAATAAATCCGAGTATACAT  
GAATTGTTTTCTTCTCAAACAAAACGCTGTTACCTTTGCGCGTATGATGACTTCCCATACTTACAAAA  
TTTTCAAACCTAATA

>8

ACAGATACAATTAAGAATAACTTGTAATGGTATTACATTACTAATAAACTTCTAAATTCATCTGTTTGG  
GTATTCATTACATATTCATCAACTAAGCAAGTCTTACATGCGTCCAAATTTGTTTGAGACAAGAAAATAT  
ACCATCTATGCTTAATAAAACAACTTCATCTCTTCTAGTACGCAAATAAATACATTAATTTATTTTACA  
TTATAATAAGATTTCATCACTTTCTCAAAATTTTGAAACCGGAAACGGAATTCAGCATGTTTAAATAAAAA  
GATGAGCAACCGCGTTTCGTACTAAATACGCAATTCCTAATAATTTGGGAATTGTAGTTAGTAATTTTAAAT  
TTAATCATTAATAACATACCAAAAAATGGGCCGCTTCTTTTAAACATTTTGCTCAGACCAAGTGAAAAAA  
CCTAAAACGCGCTCAAGAGGAACAACGGACGAGCTACACTCAAAATATTAATGAATGGGTAGTCAATTAT  
TTTACTAGCGAACAAGCAAAAAGCTTTGATCCATGGATCTCACGTAATGTAAAATAGTATCTTCCCTAAGC  
ATTATTTATTTGAGAAACAGGACGTTTATTATTGTTTGCCGCAAAGAATCCAAGTTCAGGAAAATGAAT  
ACAGACAAGAGTTGCTATTCGTTTGAATGTACATTGTGACCACAAGTCGGTTTTTGTTCCTTCCAAATA  
GTACCTTCAACACGAAGTTGTACATTTAGCACGGACAAGAATCGACCAAAAAACCAAAATTAATGTAG  
AAGGAAAACCTTCAAGTCATTTTTTTTTATAATAGCTCTTTTAAGTTCCATACTTTTTATCTCCGTAAACAA  
ATGCCAAAAGAAGCTAGTATAGACGAGAGCATTAGCCAAACAAATTTGCACAAGCAAAAAATCGTTACCAA  
TACAATTTAATATTTGTATGGGGAATTGAACTATCTATAAACTTTCTTTCATTGCTTGATTTTAGTAA  
CCTTCAGTAATCAAACAAGACTCTTCTACCAAAAATTCGTTGTGATCTGACAAGCACTTAAATGATGGAT  
ACAGAATTTATACAAATGAAAGGTAGGATTAAACTGTAAATGAATTTTAAAGGCAGAAGACTCACGTACA  
CTACACCCAGCGATTCAATTGATGTCCAGGCCTCTTTTTCCCTACTGTATACAGAAGTATGAAGTCTGCA  
GCCATAATAAAAGCGGTAGGAATGATCTATGTTTTCCGCAACGCGTCAACGATTCCATGAAGAGCCTCTC  
TTATGAATGTTCCCTAATGATCAAACTCTAAAAAAGCTAAAAAGAATAATTTTCGCAATGCTGAGAAGTT  
GAAGAGTACGGTTACACGAAGCAGTACAGGAATTCGAAATCCATCGAAAACAACCTATCCAGACAACTGA  
AAAGCTAAACAGACTACTCGTTCCTTCTAGTAGACAGTATACAGGTTTTGGAATAGCAAACCTATACTTAA  
GGCCTATGAATCATTTCCCTCAAACCTTCAAATCAATCACCAAGCCCTCAAGAACCCTTGATTAATTTT  
CCTTGTCAACCTTCTAAGCATGGGCGTTGCGTTGAGTATAAACAAAACAGCAATAAATCCGAGTATACAT  
GAATTGTTTTCTTCTCAAACAAAACGCTGTTACCTTTGCGCGTATGATGACTTCCCATACTTACAAAA  
TTTTCAAACCTAATA

>9

ACAGATACAATTAAGAATAACTTGTAATGGTATTACATTACTAATAAACTTCTAAATTCATCTGTTTGG



GTATTCATTACATATTCATCAACTAAGCAAGTCTTACATGCGTCCAAATTTGTTTAAAGACAAGAAAATAT  
ACCATCTATGCTTAATAAAACAACTTCATCTCTTCTAGTACGCAAATAAATACATTAATTTATTTTACA  
TTATAATAAGATTCATCACTTTCTCAAAAATTTTGAACCGGAAACCGGAATTCAGCATGTTTAAATAAAAA  
GATGAGCAACCGCGTTCTTACTAAATACGCAATTCCTGATAATTTGGGAATTTAGTTAGTAATTTTAAAT  
TTAATCATTAATAACATACCAAAAAATGGGCCCGTTCTTTTAAACATTTTGCTCAGACCAAGTGAAAAAA  
CCTAAAACGCGCTCAAGAGGAACAACGGACGAGCTACACTCAAATATTAATGAATGGGTAGTCAACTAT  
TTTACTAGCGAACAAGCAAAAAGCTTTGATCCATGGATCTCACGTAATGTAAAATAGTATCTTCCCTAAGC  
ATTATTTATTTGAGAAACAGGACGTTTATTATTGTTTCCGCAAAGAATCCAAGTTCAAGGAAATGAAT  
ACAGACAAGAGTTGCTATTCGTTTGAATGTACATTGTGACCACAAGTCGGTTTTTGTTCCTTCCAAATA  
GTACCTTCAACACGAAGTTGTACATTTAGCACGGACAAGAATCGACCAAAAAACCAAAATTAATGTAG  
AAGGAAAACCTTCAAGTCATTTTTTTTTATAATAGCTCTTTTAAAGTTCCATACTTTTTATCTCCGTAACAA  
ATGCCAAAAGAAGCTAGTATAGACGAGAGCATTACAGCCAACAAATTTGCACAAGCAAAAATGTTACCAA  
TACAATTTAATATTTGTATGGGGAATTGAACTATCTATAAACTTTCTTTCATTGCTTGATTTTTAGTAA  
CCTTCAGTAATCAAACGAGACTCTTCTACCAAAAATTCGTTGTGATCTGACAAGCACTTAAATGATGGAT  
ACAGAATTTATACAAATGAAAAGGTAGGATTAAACTGTAAATGAACTTTAAAGGCAGAAAGACTCACGTACA  
CTACACCCAGCGATTCAATTGATGTCCAGGCCTCTTTTTTCTACTGTATACAGAAGTATGAAGCTGCA  
GCCATAATAAAAGCGGTAGGAATGATCTATGTTTTCCGCAACGCGTCAACGATTCCATGAAGAGCCTCTC  
TTATGAATGTTCTAATGATCAAACTCTAAAAAAGCTAAAAAGAATAATTTCCGAATGCTGAAAAGTT  
GAAGAGTACGGTTACACGAAGCAGTACAGGAATTCGAAATCCATCGAAAACAACATCCAGACAACTGA  
AAAGCTAAACAGACTACTCGTTCTTTCTAGTAGACAGTATACAGGTTTTGGAATAGCAAACATACTTAA  
GGCCTATGAATCATTTCTTCAAACCTTTCAAATCAATCACCAAGTCCCTCAAGAACCCTTGATTAATTTT  
CCTTGTCAACCTTCTAAGCATGGGCGTTGCGTTGAGTATAAAACAAAACAGCAATAAATCCGAGTATACAT  
GAATTGTTTTCTTCTTCAAACAAAACGCTGTTACCTTTGCGCGTATGATGACTTCCCATACTACAAAA  
TTTTCAAACCTAATA

>10

ACAGATACAATTAAGAATAACTTGTAATGGTATTCACATTACTAATAAACTTCTAAATTCATCTGTTTGG  
GTATTCATTACATATTCATCAACTAAGCAAGTCTTACATGCGTCCAAATTTGTTTAAAGACAAGAAAATAT  
ACCATCTATGCTTAATAAAACAACTTCATCTCTTCTAGTACGCAAATAAATACATTAATTTATTTTACA  
TTATAATAAGATTCATCACTTTCTCAAAAATTTTGAACCGGAAACCGGAATTCAGCATGTTTAAATAAAAA  
GATGAGCAACCGCGTTCTTACTAAATACGCAATTCCTGATAATTTGGGAATTTAGTTAGTAATTTTAAAT  
TTAATCATTAATAACATACCAAAAAATGGGCCCGTTCTTTTAAACATTTTGCTCAGACCAAGTGAAAAAA  
CCTAAAACGCGCTCAAGAGGAACAACGGACGAGCTACACTCAAATATTAATGAATGGGTAGTCAACTAT  
TTTACTAGCGAACAAGCAAAAAGCTTTGATCCACGGATCTCACGTAATGTAAAATAGTATCTTCCCTAAGC  
ATTATTTTTTTGAGAAACAGGACGTTTATTATTGTTTCCGCAAAGAATCCAAGTTCAAGGAAATGAAT  
ACAGACCAGAGTTGCTATTCGTTTGAATGTACATTGTGACCACAAGTCGGTTTTTGTTCCTTCCAAATA  
GTACCTTCAACACGAAGTTGTACATTTAGCACGGACAAGAATCGACCAAAAAACCAAAATTAATGTAG  
AAGGAAAACCTTCAAGTCATTTTTTTTTATAATAGCTCTTTTAAAGTTCCATACTTTTTATCTCCGTAACAA  
ATGCCAAAAGAAGCTAGTATAGACGAGAGCATTACAGCCAACAAATTTGCACAAGCAAAAATGTTACCAA  
TACAATTTAATATTTGTATGGGGAATTGAACTATCTATAAACTTTCTTTCATTGCTTGATTTTTAGTAA  
CGTTCAGTAATCAAACGAGACTCTTCTACCAAAAATTCGTTGTGATCTGACAAGCACTTAAATGATGGAT  
ACAGATTTTATACAAATGAAAAGGTAGGATTAAACTGTAAATGAAATTTAAAGGCAGAAAGACTCACGTACA  
CTGCACCCAGCGATTCAATTGATGTCCAGGCCTCTTTTTTCTACTGTATACAGAAGTATGAAGCTGCA  
GCCATAATAAAAGCGGTAGGAATGATCTATGTTTTCCGCAACGCGTCAACGATTCCATGAAGAGCCTCTC  
TTATGAATATTTCTAATGATCAAACTCTAAAAAAGCTAAAAAGAATAATTTCCGAATGCTGAAAAGTT  
GAAGAGTACGGTTACACGAAGCAGTACAGGAATTCGAAATCCATCGAAAACAACATCCAGACAACTGA  
AAAGCTAAACAGACTACTCGTTCTTTCTAGTAGACAGTATACAGGTTTTGGAATAGCAAACATACTTAA  
GGCCTATGAATCATTTCTTCAAACCTTTCAAATCAATCACCAAGCCCTCAAGAACCCTTGATTAATTTT  
CCTTGTCAACCTTCTAAGCATGGGCGTTGCGTTGAGTATAAAACAAAACAGCAATAAATCCGAGTATACAT  
GAATTGTTTTCTTCTTCAAACAAAACGCTGTTACCTTTGCGCGTATGATGACTTCCCATACTTACAAAA  
TTTTCAAACCTAACA

>11

ACAGATACAATTAAGAATAACTTGTAATGGTATTCACATTACTAATAAACTTCTTAAATTCATCTGTTTGG  
GTATTCATTACATATTCATCAACTAAGCAAGTCTTACATGCGTCCAAATTTGTTTAAAGACAAGAAAATAT  
ACCATCTATGCTTAATAAAACAACTTCATCTCTTCTAGTACGCAAATAAATACATTAATTTATTTTACA  
TTATAATAAGATTCATCACTTTCTCAAAAATTTTGAACCGGAAACCGGAATTCAGCATGTTTAAATAAAAA  
GATGAGCAACCGCGTTCTTACTAAATACGCAATTCCTAATAATTTGGGAATTTAGTTAGTAATTTTAAAT

TTAATCATTAAAACATACCAAAAAATGGGCCCGTTCCTTTTAAACATTTTGCTCAGACCAAGTGAAAAAA  
CCTAAAACCGCGCTCAAGAGGAACAACGGACGAGCTACACTCAAATATTAATGAATGGGTAGTCAACTAT  
TTTACTAGCGAACAAGCAAAAAGCTTTGATCCATGGATCTCACGTAATGTAAAATAGTATCTTCCCTAAGC  
ATTATTTATTTGAGAAACAGGACGTTTCATTATTGTTTGCCGCAAAGAATCCAAGTTCAAGGAAATGAAT  
ACAGACAAGAGTTGCTATTCGTTTGAATGTACATTGTGACCACAAGTCGGTTTTTGTTCCTTCCAAATA  
GTACCTTCAACACGAAGTTGTACATTTAGCACGGACAAGAATCGACCAAAAAACCAAAATTAATGTAG  
AAGGAAAACCTTCAAGTCATTTTTTTTATAATAGCTCTTTTAAAGTTCCATACTTTTTATCTCCGTAACAA  
ATGCCAAAAGAAGCTAGTATAGACGAGAGCATTAGCCAAACAAATTTGCACAAGCAAAAAATGTTACCAA  
TACAATTTAATATTTGTATGGGGAAATTGAACTATCTATAAACTTTCTTCATTGCTTGATTTTTAGTAA  
CCTTCAGTAATCAAACGAGACTCTTCTACCAAAAATTCGTTGTGATCTGACAAGCACTTAAATGATGGAT  
ACAGAATTTATACAAATGAAAAGGTAGGATTAACCTGTAAATGAACTTTAAAGGCAGAAGACTCACGTACA  
CTACACCCAGCGATTCAATTGATGTCCAGGCCTCTTTTTTCTACTGTATACAGAAGTATGAAGCTGCA  
GCCATAATAAAAGCGGTAGGAATGATCTATGTTTTCCGCAACGCGTCAACGATTCCATGAAGAGCCTCTC  
TTATGAATGTTCTAATGATCAAACTCTAAAAAAGCTAAAAAGAATAATTTTCGCAATGCTGAAAAGTT  
GAAGAGTACGGTTACACGAAGCAGTACAGGAATTCGAAATCCATCGAAAACAACCTATCCAGACAACTGA  
AAAGCTAAACAGACTACTCGTTCCTTTCTAGTAGACAGTATACAGGTTTTGGAATAGCAAATATACTTAA  
GGCCTATGAATCATTTCTTCAAACCTTTCAAATCAATCACCAAGTCCTCAAGAACCCTTGATTAATTTT  
CCTTGTCAACCTTCTAAGCATGGGCGTTGCGTTGAGTATAAACAAAACAGCAATAAATCCGAGTATACAT  
GAATTGTTTTCTTCTTCAAACAAAACGCTGTTACCTTTGCGCGTATGATGACTTCCCATACTTACAAAA  
TTTTCAAACCTAATA

>12

ACAGATACAATTAAGAATAACTTGTAATGGTATTCACATTACTAATAAACTTCTAAATTCATCTGTTTGG  
GTATTCATTACATATTCATCAACTAAGCAAGTCTTACATGCGTCCAAATTTGTTTAAAGACAAGAAAATAT  
ACCATCTATGCTTAATAAAACAACTTCATCTCTTCTAGTACGCAAATAAATACATTAATTTATTTTACA  
TTATAATAAGATTTCATCACTTTCTCAAATTTTGAACCCGAAACCGAATTCAGCATGTTTAAATAAAAA  
GATGAGCAACCCGCTTCTTACTAAATACGCAATTCATAAATTTGGGAATTGTAGTTAGTAATTTTAAAT  
TTAATCATTAAAACATACCAAAAAATGGGCCCGTTCCTTTTAAACATTTTGCTCAGACCAAGTGAAAAAA  
CCTAAAACCGCGCTCAAGAGGAACAACGGACGAGCTACACTCAAATATTAATGAATGGGTAGTCAACTAT  
TTTACTAGCGAACAAGCAAAAAGCTTTGATCCATGGATCTCACGTAATGTAAAATAGTATCTTCCCTAAGC  
ATTATTTATTTGAGAAACAGGACGTTTCATTATTGTTTGCCGCAAAGAATCCAAGTTCAAGGAAATGAAT  
ACAGACAAGAGTTGCTATTCGTTTGAATGTACATTGTGACCACAAGTCGGTTTTTGTTCCTTCCAAATA  
GTACCTTCAACACGAAGTTGTACATTTAGCACGGACAAGAATCGACCAAAAAACCAAAATTAATGTAG  
AAGGAAAACCTTCTAGTCATTTTTTTTATAATAGCTCTTTTAAAGTTCCATACTTTTTATCTCCGTAACAA  
ATGCCAAAAGAAGCTAGTATAGACGAGAGCATTAGCCAAACAAATTTGCACAAGCAAAAAATGTTACCAA  
TACAATTTAATATTTGTATGGGGAAATTGAACTATCTATAAACTTTCTTCATTGCTTGATTTTTAGTAA  
CCTTCAGTAATCAAACGAGACTCTTCTACCAAAAATTCGTTGTGATCTGACAAGCACTTAAATGATGGAT  
ACAGAATTTATACAAATGAAAAGGTAGGATTAACCTGTAAATGAACTTTAAAGGCAGAAGACTCACGTACA  
CTACACCCAGCGATTCAATTGATGTCCAGGCCTCTTTTTTCTACTGTATACAGAAGTATGAAGCTGCA  
GCCATAATAAAAGCGGTAGGAATGATCTATGTTTTCCGCAACGCGTCAACGATTCCATGAAGAGCCTCTC  
TTATGAATGTTCTAATGATCAAACTCTAAAAAAGCTAAAAAGAATAATTTTCGCAATGCTGAAAAGTT  
GAAGAGTACGGTTACACGAAGCAGTACAGGAATTCGAAATCCATCGAAAACAACCTATCCAGACAACTGA  
AAAGCTAAACAGACTACTCGTTCCTTTCTAGTAGACAGTATACAGGTTTTGGAATAGCAAATATACTTAA  
GGCCTATGAATCATTTCTTCAAACCTTTCAAATCAATCACCAAGTCCTCAAGAACCCTTGATTAATTTT  
CCTTGTCAACCTTCTAAGCATGGGCGTTGCGTTGAGTATAAACAAAACAGCAATAAATCCGAGTATACAT  
GAATTGTTTTCTTCTTCAAACAAAACGCTGTTACCTTTGCGCGTATGATGACTTCCCATACTTACAAAA  
TTTTCAAACCTAATA

>13

ACAGATACAATTAAGAATAACTTGTAATGGTATTCACATTACTAATAAACTTCTTAAATTCATCTGTTTGG  
GTATTCATTACATATTCATCAACTAAGCAAGTCTTACATGCGTCCAAATTTGTTTAAAGACAAGAAAATAT  
ACCATCTATGCTTAATAAAACAACTTCATCTCTTCTAGTACGCAAATAAATACATTAATTTATTTTACA  
TTATAATAAGATTTCATCACTTTCTCAAATTTTGAACCCGAAACCGAATTCAGCATGTTTAAATAAAAA  
GATGAGCAACCCGCTTCTTACTAAATACGCAATTCATAAATTTGCGAATTGTAGTTAGTAATTTTAAAT  
TTAATCATTAAAACATACCAAAAAATGGGCCCGTTCCTTTTAAACATTTTGCTCAGACCAAGTGAAAAAA  
CCTAAAACCGCGCTCAAGAGGAACAACGGACGAGCTACACTCAAATATTAATGAATGGGTAGTCAACTAT  
TTTACTAGCGAACAAGCAAAAAGCTTTGATCCATGGATCTCACGTAATGTAAAATAGTATCTTCCCTAAGC  
ATTATTTATTTGAGAAACAGGACGTTTCATTATTGTTTGCCGCAAAGAATCCAAGTTCAAGGAAATGAAT

ACAGACAAGAGTTGCTATTCGTTTGAATGTACATTGTGACCACAAGTCGGTTTTTGTTCCTTCCAAATA  
GTACCTTCAACACGAAGTTGTACATTTAGCACGGACAAAGAATCGACCAAAAAACCAAATTAATGTAG  
AAGGAAAACCTTCAAGTCATTTTTTTTATAATAGCTCTTTTAAGTTCCATACTTTTTATCTCCGTAACAA  
ATGCCAAAAGAAGCTAGTATAGACGAGAGCATTTCAGCCAACAAATTTGCACAAGCAAAAATTGTTACCAA  
TACAATTTAATATTTGTATGGGGAATTGAAACTATCTATAAAACTTTCTTCATTGCTTGATTTTTAGTAA  
CCTTCAGTAATCAAACGAGACTCTTCTACCAAAAAATTCGTTGTGATCTGACAAGCACTTAAATGATGGAT  
ACAGAATTTATACAAATGAAAGGTAGGATTAAACTGTAAATGAACTTTAAAGGCAGAAGACTCACGTACA  
CTACACCCAGCGATTCAATTGATGTCCAGGCCCTTTTTTCTACTGTATACAGAAGTATGAAGTCTGCA  
GCCATAATAAAAAGCGGTAGGAATGATCTATGTTTTCCGCAACGCGTCAACGATTCATGAAGAGCCTCTC  
TTATGAATGTTCCCTAATGATCAAACTCTAAAAAAGCTAAAAAGAATAATTTTCGCAATGCTGAAAAGTT  
GAAGAGTACGGTTACACGAAGCAGTACAGGAATTCGAAATCCATCGAAAACAACTATCCAGACAACTGA  
AAAGCTAAAACAGACTACTCGTTCTTTCTAGTAGACAGTATACAGGTTTTGGAAATAGCAAATACTTAA  
GGCCTATGAATCATTTCCTTCAAACCTTTCAAAATCAATCACCAGTCCCAAGAACCCTTGATTAATTTT  
CCTTGTAACCTTCTAAGCATGGGCGTTGCGTTGAGTATAAACAAAACAGCAATAAATCCGAGTATACAT  
GAATTGTTTCTTCTTCAAACAAAACGCTGTTACCTTTGCGCGTATGATGACTTCCATACTTACAAAA  
TTTTCAAACCTAATA

>14

ACAGATACAATTAAGAATAACTTGTAATGGTATTCACATTACTAATAAACTTCTAAATTCATCTGTTTGG  
GTATTCATTACATATTCATCAACTAAGCAAGTCTTACATGCGTCCAAATTTGTTTAAGACAAGAAAATAT  
ACCATCTATGCTTAATAAACAACTTCATCTCTTAGTACGCAAATAAATACATTAATTTATTTTACA  
TTATAATAAGATTCATCACTTTCTCAAAATTTTGAAACCGGAAACGGAATTCAGCATGTTTAATAAAAA  
GATGAGCAACCGCTTCTACTAAATACGCAATTCGTATAATTTGGGAATGTAGTTAGTAATTTTAAAT  
TTAATCATTAACAATACCAAAAAATGGGCCCTTCTTTTAACATTTTGCTCAGACCAAGTGAACAAAA  
CCTAAAACGCGCTCAAGAGGAACAACGGACGAGTACACTCAAAATATTAATGAATGGGTAGTCAACTAT  
TTTACTAGCGAACAAGCAAAAGCTTTGATCCATGGATCTCACGTAATGTAATAATAGTATCTTCCCTAAGC  
ATTATTTTTTGGAAACAGGACGTTTCAATATGTTTGCCGCAAGAATCCAAGTTCAAGGAAATGAAT  
ACAGACCAAGTTGCTATTCGTTTGAATGTACATTTGTGACCACAAGTCGGTTTTTGTTCCTTCCAAATA  
GTACCTTCAACACGAAGTTGTACATTTAGCACGGACAAAGAATCGACCAAAAAACAAATTAATGTAG  
AAGGAAAACCTTCAAGTCATTTTTTTTATAATAGCTCTTTTAAGTTCCATACTTTTTATCTCCGTAACAA  
ATGCCAAAAGAAGCTAGTATAGACGAGAGCATTTCAGCCAACAAATTTGCACAAGCAAAAATTGTTACCAA  
TACAATTTAATATTTGTATGGGGAATTGAAACTATCTATAAAACTTTCTTCATTGCTTGATTTTTAGTAA  
CGTTTCAGTAATCAAACGAGACTCTTCTACCAAAAAATTCGTTGTGATCTGACAAGCACTTAAATGATGGAT  
ACAGATTTTATACAAATGAAAGGTAGGATTAAACTGTAAATGAAATTTAAAGGCAGAAGACTCACGTACA  
CTGCACCCAGCGATTCAATTGATGTCCAGGCCCTTTTTTCTACTGTATACAGAAGTATGAAGTCTGCA  
GCCATAATAAAAAGCGGTAGGAATGATCTATGTTTTCCGCAACGCGTCAACGATTCATGAAGAGCCTCTC  
TTATGAATATTCCTAATGATCAAACTCTAAAAAAGCTAAAAAGAATAATTTTCGCAATGCTGAAAAGTT  
GAAGAGTACGGTTACACGAAGCAGTACAGGAATTCGAAATCCATCGAAAACAACTATCCAGACAACTGA  
AAAGCTAAAACAGACTACTCGTTCTTTCTAGTAGACAGTATACAGGTTTTGGAAATAGCAAATACTTAA  
GGCCTATGAATCATTTCCTTCAAACCTTTCAAAATCAATCACCAGCCCTCAAGAACCCTTGATTAATTTT  
CCTTGTAACCTTCTAAGCATGGGCGTTGCGTTGAGTATAAACAAAACAGCAATAAATCCGAGTATACAT  
GAATTGTTTCTTCTTCAAACAAAACGCTGTTACCTTTGCGCGTATGATGACTTCCATACTTACAAAA  
TTTTCAAACCTAACA

## TER1 + 30

>1

TTATTGAGAAAGTGGATTCAATCAGCTATATGTTAAGCATTAGTAATTGAAGAGGTCTCTCATTCTTACTTT  
AATCGAAGCTGCTATGGAATTTGACTTTATGGCTGATTAGAAGCGTGTACTGTATACTCACCTCGTTTAA  
CATTCTTTGACTCGAATTCGCAATTTGGTCTTCACGACCCATTCCAGCTTCCCGTGAAGCTTGTTCTGGTA  
AATGAATAGCAAGTTTTTCTGTATGGCTTGACGAAACACCGATTTTACGTAATGTAATCGTTGATACTT  
ATAAAGTGTAAAATCAGATTTTCTAATTTCAAATTTAAAAGCATAAATAAAAGCTCTAAACTACATGGGAT  
TATGAAACACACCTTTCCAATGCAATTTTGGTAAAACGCTAGCATCTCCGTGAGACGACATGAATGCTAG  
AAAGAAATGTTTTTCTTTAAGAATATATGATTAATAGATTAGAATATATTAAGAGAAAGTTAAATTTTTAG  
CTGAGAGATAGAAATCATTAGTCTGAAAAGAATTTGGATGTGATAGTA

>2

TTATTGAGAAAGTGGATTCAATCAGCTATATGTTAAGCATTAGTAATTGAAGAGGTCTCT  
CATTCTTACTTTAATCGAAGCTGCTATGGAATTTGACTTTATGGCTGATTAGAAGCGTGT

ACTGTATACTCACCTCGTTTAAACATTTCTTTGACTCGAATTCGCAATTGGTCTTCACGAC  
CCATTCCAGCTTCCCCTGAAGCTTGTTCTGGTAAATGAATAGCAAGTTTTTCTTGTATGG  
CTTGGCGAAACACCGATTTTACGTAACGTGAATCGTTGATACTTAGAAAAGTGTAAAAATC  
AGATTTTCTAATTTCAAATTTAAAAGCATAAATAAAAAGCTCTAAACTACAATGGGATTATG  
AAACACACCTTTCCAATGCAATTTTTGGTAAAACGCTAGCATCTCCGTGAGACGACATGA  
ATGCTAGAAAAGAAATGATTTTCTTTAAGAATATATGATTAATAGATTAGAATATATTAAG  
AGAAAGTTAAATTTTTAGCTGAGAGATAGAAATCATTAGTCTGAAAAGAATTTGGATGTG  
ATAGTA

>3

TTATTGAGAAAAGTGGATTCAATCAGCTATATGTTAAGCATTAGTAATTGGAGAGGTCTCT  
CATTTTACTTTAATCGAAGCTGCTATGGAATTTGACTTTTATGGCTGATTAGAAGCGTGT  
ACTGTATACTCACCTCGTTTAAACATTTCTTTGACTCGAATTCGCAATTGGTCTTCACGAC  
CCATTCCAGCTTCCCCTGAAGCTTGTTCTGGTAAATGAATAGCAAGTTTTTCTTGTATGG  
CTTGACGAAACACCGATTTTACGTAACGTGAATCGTTGATACTTATAAAAGTGTAAAAATC  
AGATTTTCTAATTTCAAATTTAAAAGCATAAATAAAAAGCTCTAAACTACA-TGGGATTATG  
AAACACACCTTTCCAATGCAATTTTTGGTAAAACGCTAGCATCTCCGTGAGACGACATGA  
ATGCTAGAAAAGAAATGATTTTCTTTAAGAATATATGATTAATAGATTAGAATATATTAAG  
AGAAAGTTAAATTTTTAGCTGAGAGATAGAAATCATTAGTCTGAAAAGAATTTGGATGTG  
ATAGTA

>4

TTATTGAGAAAAGTGGATTCAATCAGCTATATGTTAAGCATTAGTAATTGAAGAGGTCTCT  
CATTTTACTTTAATCGAAGCTGCTATGGAATTTGACTTTTATGGCTGATTAGAAGCGTGT  
ACTGTATACTCACCTCGTTTAAACATTTCTTTGACTCGAATTCGCAATTGGTCTTCACGAC  
CCATTCCAGCTTCCCCTGAAGCTTGTTCTGGTAAATGAATAGCAAGTTTTTCTTGTATGG  
CTTGACGAAACACCGATTTTACGTAACGTGAATCGTTGATACTTATAAAAGTGTAAAAATC  
AGATTTTCTAATTTCAAATTTAAAAGCATAAATAAAAAGCTCTAAACTACAATGGGATTATG  
AAACACACCTTTCCAATGCAATTTTTGGTAAAACGCTAGCATCTCCGTGAGACGACATGA  
ATGCTAGAAAAGAAATGATTTTCTTTAAGAATATATGATTAATAGATTAGAATATATTAAG  
AGAAAGTTAAATTTTTAGCTGAGAGATAGAAATCATTAGTCTGAAAAGAATTTGGATGTG  
ATAGTA

>5

TTATTGAGAAAAGTGGATTCAATCAGCTATATGTTAAGCATTAGTAATTGAAGAGGTCTCT  
CGTTTTACTTTAATCGAAGCTGCTATGGAATTTGACTTTTATGGCTGATTAGAAGCGTGT  
ACTGTATACTCACCTCGTTTAAACATTTCTTTGACTCGAATTCGCAATTGGTCTTCACGAC  
CCATTCCAGCTTCCCCTGAAGCTTGTTCTGGTAAATGAATAGCAAGTTTTTCTTGTATGG  
CATGGCGAAACACCGATTTTACGTAACGTGAATCGTTGATACTTAGAAAAGTGTAAAAATC  
AGATTTTCTAATTTCAAATTTAAAAGCATAAATAAAAAGCTCTAAACTACAATGGGATTATG  
AAACACACCTTTCCAATGCAATTTTTGGTAAAACGCTAGCATCTCCGTGAGACGACATGA  
ATGCTAGAAAAGAAATGATTTTCTTTAAGAATATATGATTAATAGATTAGAATATATTAAG  
AGAAAGTTAAATTTTTAGCTGAGAGATAGAAATCATTAGTCTGAAAAGAATTTGGATGTG  
ATAGTA

>6

TTATTGAGAAAAGTGGATTCAATCAGCTATATGTTAAGCATTAGTAATTGAAGAGGTCTCT  
CATTTTACTTTAATCGAAGCTGCTATGGAATTTGACTTTTATGGCTGATTAGAAGCGTGT  
ACTGTATACTCACCTCGTTTAAACATTTCTTTGACTCGAATTCGCAATTGGTCTTCACGAC  
CCATTCCAGCTTCCCCTGAAGCTTGTTCTGGTAAATGAATAGCAAGTTTTTCTTGTATGG  
CTTGACGAAACACCGATTTTACGTAACGTGAATCGTTGATACTTATAAAAGTGTAAAAATC  
AGATTTTCTAATTTCAAATTTAAAAGCATAAATAAAAAGCTCTAAACTACAATGGGATTATG  
AAACACACCTTTCCAATGCAATTTTTGGTAAAACGCTAGCATCTCCGTGAGACGACATGA  
ATGCTAGAAAAGAAATGATTTTCTTTAAGAATATATGATTAATAGATTAGAATATATTAAG  
AGAAAATTTAAATTTTTAGCTGAGAGATAGAAATCATTAGTCTGAAAAGAATTTGGATGTG  
ATAGTA

## TER1 + 100

>1

ATCAAGAAACGTTCCCCTACTGTGCAAGTTGCGCTTGATGAATACGCTCAAAAATCCCTCTACTGCATCT  
GAGACACTAGTAAACAAGGAGCTTGCTAATTTTTTCATCTATAAAGGAAGCTGTTTCGAAAACCTAGAAC

TGCGGGAAAAAGTGCGGGCCCTTGAATGCGATGTGCGAAATCCAAAAGCAAACGTGTC CAATATCAAATTC  
CAATGCAGTTAAAGAAAATTCAAATACACTTTTCAGAGCAAATGAAAAATTTGGAAAGTGAGTTAAATTCG  
TCAAAAATAAAAAATGAGTCCTTACTTAATGAACGAAATTTACTGAAAGAAATGTTAGCTACTTCTCGAA  
GCAGTATTTTGTCTCACAATTCTTCCGCGGGCAATATTGATGACAAAATGAAATCCATTGATGAATCTAC  
AAGAGA ACTTGAGAAAAATTACGAAGTTTATCGTAACGAAATGACAGCTATT CAGGAATCCTTGTCTAAG  
CGAAATCAGGATTTGTTGAGTGAGATGGAAGCGATACGTAAGAGTTAGAAAATTTCCAAATATCAGCAGC  
AGTTATCTACTGATAGATTA ACTAATGCTAATAATGACGTTGAAGCCTT

>2

ATCAAGAAACGTTCCCGCTACTGTGCAAGTTGCGCTTGATGAATACGCTCAAATCCCTCTACTGCATCT  
GAGACACTAGTAAACAAGGAGCTTGCTAATTTTTCATCTATAAAGGAAGCTGTTTCGAAAACCTCTAGAAC  
TGCGGGAAAAAGTGCGGGCCCTTGAATGCGATGTTGAAATCCAAAAGCAAACGTGTC CAATATCAAATTC  
CAATGCAGTTAAAGAAAATTCAAATACACTTTTCAGAGCAAATC AAAAATTTGGAAAGTGAGTTAAATTCG  
TCAAAAATAAAAAATGAGTCCTTACTTAATGAACGAAATTTACTGAAAGAAATGTTAGCTACTTCTCGAA  
GCAGTATTTTGTCTCACAATTCTTCCGCGGGCAATATTGATGACAAAATGAAATCCATTGATGAATCTAC  
AAGAGA ACTTGAGAAAAATTACGAAGTTTATCGTAACGAAATGACAGCTATT CAGGAATCCTTGTCTAAG  
CGAAATCAGGATTTGTTGAGTGAGATGGAAGCAATACGTAAGAGTTAGAAAATTTCCAAATATCAGCAGC  
AGTTATCTACTGATAGATTA ACTAATGCTAATAATGACGTTGAAGCCTT

>3

ATCAAGAAACGTTCCCGCTACTGTGCAAGTTGCGCTTGATGAATACGCTCAAATCCCTCTACTGCATCT  
GAGACACTAGTAAACAAGGAGCTTGCTAATTTTTCATCTATAAAGGAAGCTGTTTCGAAAACCTCTAGAAC  
TGCGGGAAAAAGTGCGGGCCCTTGAATGCGATGTGCGAAATCCAAAAGCAAACGTGTC CAATATCAAATTC  
CAATGCAGTTAAAGAAAATTCAAATACACTTTTCAGAGCAAATC AAAAATTTGGAAAGTGAGTTAAATTCG  
TCAAAAATAAAAAATGAGTCCTTACTTAATGAACGAAATTTACTGAAAGAAATGTTAGCTACTTCTCGAA  
GCAGTATTTTGTCTCACAATTCTTCCGCGGGCAATATTGATGACAAAATGAAATCCATTGATGAATCTAC  
AAGAGA ACTTGAGAAAAATTACGAAGTTTATCGTAACGAAATGACAGCTATT CAGGAGTCCTTGTCTAAG  
CGAAATCAGGATTTGTTGAGTGAGATGGAAGCGATACGTAAGAGTTAGAAAATTTCCAAATATCAGCAGC  
AGTTATCTACTGATAGATTA ACTAATGCTAATAATGACGTTGAAGCCTT

>4

ATCAAGAAACGTTCCCGCTACTGTGCAAGTTGCGCTTGATGAATACGCTCAAATCCCTCTACTGCATCT  
GAGACACTAGTAAACAAGGAGCTTGCTAATTTTTCATCTATAAAGGAAGCTGTTTCGAAAACCTCTAGAAC  
TGCGGGAAAAAGTGCGGGCCCTTGAATGCGATGTTGAAATCCAAAAGCAAACGTGTC CAATATCAAATTC  
CAATGCAGTTAAAGAAAATTCAAATACACTTTTCAGAGCAAATC AAAAATTTGGAAAGTGAGTTAAATTCG  
TCAAAAATAAAAAATGAGTCCTTACTTAATGAACGAAATTTACTGAAAGAAATGTTAGCTACTTCTCGAA  
GCAGTATTTTGTCTCACAATTCTTCCGCGGGCAATATTGATGACAAAATGAAATCCATTGATGAATCTAC  
AAGAGA ACTTGAGAAAAATTACGAAGTTTATCGTAACGAAATGACAGCTATT CAGGAATCCTTGTCTAAG  
CGAAATCAGGATTTGTTGAGTGAGATGGAAGCGATACGTAAGAGTTAGAAAATTTCCAAATATCAGCAGC  
AGTTATCTACTGATAGATTA ACTAATGCTAATAATGACGTTGAAGCCTT

>5

ATCAAGAAACGTTCCCGCTACTGTGCAAGTTGCGCTTGATGAATACGCTCAAATCCCTCTACTGCATCT  
GAGACACTAGTAAACAAGGAGCTTGCTAATTTTTCATCTATAAAGGAAGCTGTTTCGAAAACCTCTAGAAC  
TGCGGGAAAAAGTGCGGGCCCTTGAATGCGATGTGCGAAATCCAAAAGCAAACGTGTC CAATATCAAATTC  
CAATGCAGTTAAAGAAAATTCAAATACACTTTTCAGAGCAAATG AAAAATTTGGAAAGTGAGTTAAATTCG  
TCAAAAATAAAAAATGAGTCCTTACTTAATGAACGAAATTTACTGAAAGAAATGTTAGCTACTTCTCGAA  
GCAGTATTTTGTCTCACAATTCTTCCGCGGGCAATATTGATGACAAAATGAAATCCATTGATGAATCTAC  
AAGAGA ACTTGAGAAAAATTACGAAGTTTATCGTAACGAAATGACAGCTATT CAGGAATCCTTGTCTAAG  
CGAAATCAGGATTTGTTGAGTGAGATGGAAGCGATACGTAAGAGTTAGAAAATTTCCAAATATCAGCAGC  
AGTTATCTACTGATAGATTA ACTAATGCTAATAATGACGTTGAAGCCTT

## CC2L

>1

CAGCACGGACGGTAAGCTCGCGATGGGCGGATGCATGGGATTACGGTTTGGAAAGCAACGACGCGATT  
CCAGTTGTTACGCTGGAAGTCAGAGCGAAGTTGAGCAGGTGAGTAGCGGTACTCTACGAAATCGAAATGG  
CGAATAGGAGTAACGGCTTGAAGTTTACCACCAACATACACATTTCCAGCACGACCAAACAAGTAGTCGA

CGGCAGGGTGGGCGCGATCATTAGCACCAAATACCTTTTCAGCTTCGTTTCGCCTTATCTGGGGTATACTT  
GTCCTCAACAGTCAAAAATGGCAATAACAGTTTGCCCATCCCTAGGATCTAATAATGCAACACGATCACCG  
GCCTTCAAAGAATCGGCCTGCGATTTCATTGAGGTCCAAGGTGATAGGGATGGGAAAGACCTCGCCAGTGC  
TGAGACGCAAATTCTCGACGACATTCAAATAATCCTTTTGGTTTCATGAATCCGTCTAATGGACTGAAACC  
TCCGTTCAAATGAGTTCCACATCGCAAACCTGACGTTCCGATAGTACAATTTTGGGAAGGCTAGTAGCC  
TCCTGTTCCAGTTGTTCTCTCAGAGGAGCATCTCTGGCGTTAAGATCTTTCAACAAAGCTTTAGTCATTT  
TGACACCCCAAATCGTAAAGGACCTGCTT

>2

CAGCACGGACGGTAAGCTCACGATGGGCGCGATGCATGGGATTACGGGTTTGGAAAAGCAACGACGCGATT  
CCAGTTGTTACGCTGGAAGTCAGAGCGAAGTTGAGCAGGTGAGTAGCGGTACTCTACGAAATCGAAATGG  
CGAATAGGAGTAACGGCTTGAAGTTTACCACCAACATACACATTTCCAGCACGACCAAACAAGTAGTCGA  
CGGCAGGGTGGGCGCGATCATTAGCACCAAATACCTTTTCAGCTTCGTTTCGCCTTATCTGGGGTATACTT  
GTCCTCAACAGTCAAAAATGGCAATAACAGTTTGCCCATCCCTAGGATCTAATAATGCAACACGATCACCG  
GCCTTCAAAGAATCGGCCTGCGATTTCATTGAGGTCCAAGGTGATAGGGATGGGAAAGACCTCGCCAGTGC  
TGAGACGCAAATTCTCGACGACATTCAAATAATCCTTTTGGTTTCATGAATCCGTCTAATGGACTGAAACC  
TCCGTTCAAATGAGTTCCACATCGCAAACCTGACGTTCCGATAGTACAATTTTGGGAAGGCTAGTAGCC  
TCCTGTTCCAGTTGTTCTCTCAGAGGAGCATCTCTGGCGTTAAGATCTTTCAACAAAGCTTTAGTCATTT  
TGACACCCCAAATCGTAAAGGACCTGCTT

>3

CAGCACGGACGGTAAGCTCACGATGGGCGCGATGCATGGGATTACGGGTTTGGAAAGCAACGACGCGATT  
CCAGTTGTTACGCTGGAAGTCAGAGCGAAGTTGAGCAGGTGAGTAGCGGTA CTCTACGAAATCGAAATGG  
CGAATAGGAGTAACGGCTTGAAGTTTACCACCAACATACACATTTCCAGCACGATCAAACAAGTAGTTCGA  
CGGCAGGGTGGGCGCGATCATTAGCACCAAAATACCTTTTTCAGCTTCGTTTCGCCTTATCTGGGGTATACTT  
GTCCTCAACAGTCAAATGGCAATAACAGTTTGCCCATCCCTAGGATCTAATAATGCAACACGATCACCG  
GCCTTCAAAGAATCGGCCTGCGATTCAATTGAGGTCCAAGGTGATAGGGATGGGAAAGACCTCGCCAGTGC  
TGAGACGCAAATTCGACGACATTCAAATAATCCTTTTGGTTTCATGAATCCGTCTAATGGACTGAAACC  
TCCGTTCAAATGAGTTCCACATCGCAAACCTGACGTTCCGATAGTACAATTTTGGGAAGGCTAGTAGCC  
TCCTGTTCCAGTTGTTCTCTCAGAGGAGCATCTCTGGCGTTAAGATCTTTCAACAAAGCTTTAGTCATTT  
TGACACCCCAAATCGTAAAGGACCTGCTT

>4

CAGCACGGACGGTAAGCTCACGATGGGCGCGATGCATGGGATTACGGGTTTGGAAAGCAACGACGCGATT  
CCAGTTGTTACGCTGGAAGTCAGAGCGAAGTTGAGCAGGTGAGTAGCGGTA CTCTACGAAATCGAAATGG  
CGAATAGGAGTAACGGCTTGAAGTTTACCACCAACATACACATTTCCAGCACGACCAAACAAGTAGTTCGA  
CGGCAGGGTGGGCGCGATCATTAGCACCAAAATACCTTTTTCAGCTTCGTTTCGCCTTATCTGGGGTATACTT  
GTCCTCAACAGTCAAATGGCAATAACAGTTTGCCCATCCCTAGGATCTAATAATGCAACACGATCACCG  
GCCTTCAAAGAATCGGCCTGCGATTCAATTGAGGTCCAAGGTGATAGGGATGGGAAAGACCTCGCCAGTGC  
TGAGACGCAAATTCGACGACATTCAAATAATCCTTTTGGTTTCATGAATCCGTCTAATGGACTGAAACC  
TCCGTTCAAATGAGTTCCACATCGCAAACCTGACGTTCCGATAGTACAATTTTGGGAAGGCTAGTAGCC  
TCCTGTTCCAGTTGTTCTCTCAGAGGAGCATCTCTGGCGTTAAGATCTTTCAACAAAGCTTTAGTCATTT  
TGACACCCCAAATCGTAAAGGACCTGGTT

>5

CAGCACGGACGGTAAGCTCACGATGGGCGCGATGCATGGGATTACGGGTTTGGAAAGCAACGACGCGATT  
CCAGTTGTTACGCTGGAAGTCAGAGCGAAGTTGAGCAGGTGAGTAGCGGTA CTCTACGAAATCGAAATGG  
CGAATAGGAGTAACGGCTTGAAGTTTACCACCAACATACACATTTCCAGCACGACCAAACAAGTAGTTCGA  
CGGCAGGGTGGGCGCGATCATTAGCACCAAAATACCTTTTTCAGCTTCGTTTCGCCTTATCTGGGGTATACTT  
GTCCTCAACAGTCAAATGGCAATAACAGTTTGCCCATCCCTAGGATCTAATAATGCAACACGATCACCG  
GCCTTCAAAGAATCGGCCTGCGATTCAATTGAGGTCCAAGGTGATAGGGATGGGAAAGACCTCGCCAGTGC  
TGAGACGCAAATTCGACGACATTCAAAGTAATCCTTTTGGTTTCATGAATCCGTCTAATGGACTGAAACC  
TCCGTTCAAATGAGTTCCACATCGCAAACCTGACGTTCCGATAGTACAATTTTGGGAAGGCTAGTAGCC  
TCCTGTTCCAGTTGTTCTCTCAGAGGAGCATCTCTGGCGTTAAGATCTTTCAACAAAGCTTTAGTCATTT  
TGACACCCCAAATCGTAAAGGACCTGCTT

## CC2R

>1

GTGCCTTTATATTCTTTAACAAGGCTATATGTTTTAGCTTTGTAAGAAGGATGGCGATCTCGTACAGCGG  
TACGATGTCCCAAGACACCACCAAGACACCAATGAGAACACTACAAATTAAGCGACTATAAAAAATTA  
TATCCAAATAAAGTAACGTCGGTACCAAGGCAATAACTTTTTCTCTGCAGCCTTTTCGTTAAAGGCTTCA  
TTGTTTTCGTTATTATTATTGCTATCAAGGTTTTTCATGGTCATTATCGTGATCATCAATTTTCAGTGTCTG  
TATGATTGTCGATAACATCATTAGTTGACTCGTTCCTTGCCTGCCGGTTCGTAATATTCTCAAAGCTAGC  
AGAGGACAATGCAGCAGATGAGAGACTATGGCGTGAATCTGTAGTGGAATCAGGAATACCCATTGCAAAA  
GTAGTAAAAGTTAATCAAATTTCAACAAATTAAGAAGGGCGAGAAAAATCAAAAAGAAAGAAAAGATAA  
GAATAAAAAGAGCGGGAAGTAATGAGACACGATCAAATAAAAAAATGCCAATCTGGTGAGCTATGCACCA  
AGTTTCAGAAATGGAAATAAAATGCTAGTAAAAATAACCAAACCTCAAGGATATCTTGTTAAAGGGGAATAA  
AAAAGGGAATATGGGATAATGCTTTGTAGAGATGAGAAATGCGGTTTAAATGAAAATAATTATTATCG  
AAAGACGATAGATAGGGAG

>2

GTGCCTTTATATTCTTTAACAAGGCTATATGTTTTAGCTTTGTAAGAAGGATGGCGATCTCGTACAGCGG  
TACGATGTCCCAAGACACCACCAAGACACCAATGAGAACACTACAAATTAAGCGACTATAAAAAATTA  
TATCCAAATAAAGTAACGTCGGTACCAAGGCAATAACTTTTTCTCTGCAGCCTTTTCGTTAAAGGCTTCA  
TTGTTTTCGTTATTATTATTGCTATCAAGGTTTTTCATGGTCATTATCGTGATCATCAATTTTCAGTGTCTG  
TATGATTGTCGATAACATCATTAGTTGACTCGTTCCTTGCCTGCCGGTTCGTAATATTCTCAAAGCTAGC

AGAGGACAATGCAGCAGATGAGAGACTATGGCGTGAATCTGTCTGGAATCAGGAATACCCATTGCAAAA  
GTAGTAAAAGTTAATCAAATTTCAACAAATTAAGAAGGGCGAGAAAAATCAAAAAGAAAAGATAA  
GAATAAAAAGAGCGGGAAGTAATGAGACACGATCAAATAAAAAAATGCCAATCTGGTGAGCTATGCACCA  
AGTTCAGAAATGGAAATAAAATGCTAGTAAAAATAACCAAACCTCAAGGATATCTTGTTAAAGGGGAATAA  
AAAAGGGAAATATGGGATAATGCTTTGTAGAGATGAGAAATGCGGTTTAAAATGAAAAATAATTATTATCG  
AAAGACGATAGATAGGGAG

>3

GTGCCTTTATATTCTTTAACAAGGCTATATGTTTTAGCTTTGTAAGAAGGATGGCGATCTCGTACAGCGG  
TACGATGTCCCAAGACACCACCCAAGACACCAATGAGAACACTACAAATTAAGCGACTATAAAAAATTAA  
TATCCAAATAAAGTAACGTCGGTACCAAGGCAATAACTTTTTCTCTGCAGCCTTTTCGTTAAAGGCTTCA  
TTGTTTTCGTTATTATTATGCTATCAAGGTTTTCATGGTCATTATCGTGATCATCAATTTTCAGTGTCTG  
TATGATTGTGCGATAACATCATTAGTTGACTCGTTCCTGCGTGCCGGGTCGTAAATATTCTCAAAGCTAGC  
AGAGGACAACGCAGCAGATGAGAGACTATGGCGTGAATCTGTAGTGGAATCAGGAATACCCATTGCAAAA  
GTAGTAAAAGTTAATCAAATTTCAACAAATTAAGAAGGGCGAGAAAAATCAAAAAGAAAAGATAA  
GAATAAAAAGAGCGGGAAGTAATGAGACACGATCAAATAAAAAAATGCCAATCTGGTGAGCTATGCACCA  
AGTTCAGAAATGGAAATAAAATGCTAGTAAAAATAACCAAACCTCAAGGATATCTTGTTAAAGGGGAATAA  
AAAAGGGAAATATGGGATAATGCTTTGTAGAGATGAGAAATGCGGTTTAAAATGAAAAATAATTATTATCG  
AAAGACGATAGATAGGGAG

>4

GTGCCCTTATATTCTTTAACAAGGCTATATGTTTTAGCTTTGTAAGAAGGATGGCGATCTCGTACAGCGG  
TACGATGTCCCAAGACACCACCCAAGACACCAATGAGAACACTACAAATTAAGCGACTATAAAAAATTAA  
TATCCAAATAAAGTAACGTCGGTACCAAGGCAATAACTTTTTCTCTGCAGCCTTTTCGTTAAAGGCTTCA  
TTGTTTTCGTTATTATTATGCTATCAAGGTTTTCATGGTCATTATCGTGATCATCAATTTTCAGTGTCTG  
TATGATTGTGCGATAACATCATTAGTTGACTCGTTCCTGCGTGCCGGGTCGTAAATATTCTCAAAGCTAGC  
AGAGGACAATGCAGCAGATGAGAGACTATGGCGTGAATCTGTAGTGGAATCAGGAATACCCATTGCAAAA  
GTAGTAAAAGTTAATCAAATTTCAACAAATTAAGAAGGGCGAGAAAAATCAAAAAGAAAAGATAA  
GAATAAAAAGAGCGGGAAGTAATGAGACACGATCAAATAAAAAAATGCCAATCTGGTGAGCTATGCACCA  
AGTTCAGAAATGGAAATAAAATGCTAGTAAAAATAACCAAACCTCAAGGATATCTTGTTAAAGGGGAATAA  
AAAAGGGAAATATGGGATAATGCTTTGTAGAGATGAGAAATGCGGTTTAAAATGAAAAATAATTATTATCG  
AAAGACGATAGATAGGGAG

>5

GTGCCTTTATATTCTTTAACAAGGCTATATGTTTTAGCTTTGTAAGAAGGATGGCGATCTCGTACAGCGG  
TACGATGTCCCAAGACACCACCCAAGACACCAATGAGAACACTACAAATTAAGCGACTATAAAAAATTAA  
TATCCAAATAAAGTAACGTCGGTACCAAGGCAATAACTTTTTCTCTGCAGCCTTTTCGTTAAAGGCTTCA  
TTGTTTTCGTTATTATTATGCTATCAAGGTTTTCATGGTCATTATCGTGATCATCAATTTTCAGTGTCTG  
TATGATTGTGCGATAACATCATTAGTTGACTCGTTCCTGCGTGCCGGGTCGTAAATATTCTCAAAGCTAGC  
AGAGGACAACGCAGCAGATGAGAGACTATGGCGTGAATCTGTAGTGGAATCAGGAATACCCATTGCAAAA  
GTAGTAAAAGTTAATCAAATTTCAACAAATTAAGAAGGGCGAGAAAAATCAAAAAGAAAAGATAA  
GAATAAAAAGAGCGGGAAGTAATGAGACACGATCAAATAAAAAATATGCCAATCTGGTGAGCTATGCACCA  
AGTTCAGAAATGGAAATAAAATGCTAGTAAAAATAACCAAACCTCAAGGATATCTTGTTAAAGGGGAATAA  
AAAAGGGAAATATGGGATAATGCTTTGTAGAGATGAGAAATGCGGTTTAAAATGAAAAATAATTATTATCG  
AAAGACGATAGATAGGGAG

>6

GTGCCTTTATATTCTTTAACAAGGCTATATGTTTTAGCTTTGTAAGAAGGATGGCGATCTCGTACAGCGG  
TACGATGTCCCAAGACACCACCCAAGACACCAATGAGAACACTACAAATTAAGCGACTATAAAAAATTAA  
TATCCAAATAAAGTAACGTCGGTACCAAGGCAATAACTTTTTCTCTGCAGCCTTTTCGTTAAAGGCTTCA  
TTGTTTTCGTTATTATTATGCTATCAAGGTTTTCATGGTCATTATCGTGATCATCAATTTTCAGTGTCTG  
TATGATTGTGCGATAACATCATTAGTTGACTCGTTCCTGCGTGCCGGGTCGTAAATATTCTCAAAGCTAGC  
AGAGGACAACGCAGCAGATGAGAGACTATGGCGTGAATCTGTAGTGGAATCAGGAATACCCATTGCAAAA  
GTAATAAAAAGTTAATCAAATTTCAACAAATTAAGAAGGGCGAGAAAAATCAAAAAGAAAAGATAA  
GAATAAAAAGAGCGGGAAGTAATGAGACACGATCAAATAAAAAAATGCCAATCTGGTGAGCTATGCACCA  
AGTTCAGAAATGGAAATAAAATGCTAGTAAAAATAACCAAACCTCAAGGATATCTTGTTAAAGGGGAATAA  
AAAAGGGAAATATGGGATAATGCTTTGTAGAGATGAGAAATGCGGTTTAAAATGAAAAATAATTATTATCG  
AAAGACGATAGATAGGGAG



>7

GTGCCCTTATATTCTTTAACAAGGCTATATGTTTTAGCTTTGTAAGAAGGATGGCGATCTCGTACAGCGG  
TACGATGTCCCAAGACACCACCCAAGACACCAATGAGAACACTACAAATTAAGCGACTATAAAAAATTAA  
TATCCAAATAAAGTAACGTCGGTACCAAGGCAATAACTTTTTCTCTGCAGCCTTTTCGTTAAAGGCTTCA  
TTGTTTTCGTTATTATTATGCTATCAAGGTTTTTCATGGTCATTATCGTGATCATCAATTTTCAGTGTCTG  
TATGATTGTGCGATAACATCATTAGTTGACTCGTTCCTGCGTGCCGGGTCGTAAATATTCTCAAAGCTAGC  
AGAGGACAACGCAGCAGATGAGAGACTATGGCGTGAATCTGTAGTGGAATCAGGAATACCCATTGCAAAA  
GTAGTAAAAGTTAATCAAATTTCAACAAATTAAGAAGGGCGAGAAAAATCAAAAAGAAAAGATAA  
GAATAAAAAGAGCGGGAAGTAATGAGACACGATCAAATAAAAAAATGCCAATCTGGTGAGCTATGCACCA  
AGTTCAGAAATGGAAATAAAATGCTAGTAAAAATAACCAAACCTCAAGGATATCTTGTAAAGGGGAATAA  
AAAAGGGAAATATGGGATAATGCTTTGTAGAGATGAGAAATGCGGTTTAAAATGAAAATAATTATTATCG  
AAAGACGATAGATAGGGAG

## Central core chromosome II

>1

AGATTTGAGCAATAATTTCCCTAAAACATTTACAATTAATGGGTTATTTTTTTTTTT-CTAAAAATTGAAGG  
AGCTTGTTTTGATCTATTCCGTTATTAGTATGTAAATTTAAAAAATCGTATCCCTAACTAATTCATACTTA  
AACATAATATGCAGATTTTAAAAATAATTGTCCATATAGATAACACGCGGAATACTTAGAAAAGTAGAATT  
GGCCGAAGCCAAAAAGGAAACATAGAAATCAACCAGGACTAACCAATGCTTCTTCATATTAACGAGTAAC  
GCGGCTTACGCATCACAAAGCAGTACGTGTGAATAAATATTATTGGAAAACATTTTTCTTTAACCAGCTA  
AACCGCTTAAAGAAAAATGAATAAGATACAAATTTTCAGGTTTTTGCTTTGATGCTAAAACTCGTCGAA  
TTCTAAAACCAAGAATTAACGTACCCTTAACTTTTTTTTTTT-GATTTTCGTAATAATAATTATCGGAG  
TTCGCGTTTTTCATTTTAAAAAAA-GGTTTAGTAAATCTCAAATTTGCGATACGAACAATGATAATGATATT  
TTCAGATAAACGTTACTTAATAGCATCTTATAGTCATGGGCCATCTCAATATTACCATTAAACTTTTAAG  
CAAAAAGATCATTTCTATTTTAAAAAACCTAATAAAAATTACCTTTTGTAAGTATACGTTTGCTAAACAA  
TAAAAGAACGTAATACTAA

>2

AGATTTGAGCAATAATTTCCCTAAAACATTTACAATTAATGGGTTATTTTTTTTTTT-CTAAAAATTGAAGG  
AGCTTGTTTTGATCTATTCCGTTATTAGTATGTAAATTTAAAAAATCGTATCCCTAACTAATTCATACTTA  
AACATAATATGCAGATTTTAAAAATAATTGTCCATATAGATAACACGCGGAATACTTAGAAAAGTAGAATT  
GGCCGAAGCCAAAAAGGAAACATAGAAATCAACCAGGACTAACCAATGCTTCTTCATATTAACGAGTAAC  
GCGGCTTACGCATCACAAAGCAGTACGTGTGAATAAATATTATTGGAAAACATTTTTCTTTAACCAGCTA  
AACCGCTTAAAGAAAAATGAATAAGATACAAATTTTCAGGTTTTTGCTTTGATGCTAAAACTCGTCGAA  
TTCTAAAACCAAGAATTAACGTACCCTTAACTTTTTTTTTTT-GATTTTCGTAATAATAATTATCGGAG  
TTCGCGTTTTTCATTTTAAAAAAAAGGTTTAGTAAATCTCAAATTTGCGATACGAACAATGATAATGATATT  
TTCAGATAAACGTTACTTAATAGCATCTTATAGTCATGGGCCATCTCAATATTACCATTAAACTTTTAAG  
CAAAAAGATCATTTCTATTTTAAAAAACCTAATAAAAATTACCTTTTGTAAGTATACGTTTGCTAAACAA  
TAAAAGAACGTAATACTAA

>3

AGATTTGAGCAATAATTTCCCTAAAACATTTACAATTAATGGGTTATTTTTTTTTTT-CTAAAAATTGAAGG  
AGCTTGTTTTGATCTATTCCGTTATTAGTATGTAAATTTAAAAAATCGTATCCCTAACTAATTCATACTTA  
AACATAATATGCAGATTTTAAAAATAATTGTCCATATAGATAACACGCGGAATACTTAGAAAAGTAGAATT  
GGCCGAAGCCAAAAAGGAAACATAGAAATCAACCAGGACTAACCAATGCTTCTTCATATTAACGAGTAAC  
GCGGCTTACGCATCACAAAGCAGTACGTGTGAATAAATATTATTGGAAAACATTTTTCTTTAACCAGCTA  
AACCGCTTAAAGAAAAATGAATAAGATACAAATTTTCAGGTTTTTGCTTTGATGCTAAAACTCGTCGAA  
TTCTAAAACCAAGAATTAACGTACCCTTAACTTTTTTTTTTT--GATTTTCGTAATAATAATTATCGGAG  
TTCGCGTTTTTCATTTTAAAAAAA-GATTTTAGTAAATCTCAAATTTGCGATACGAACAATGATAATGATATT  
TTCAGATAAACGTTACTTAATAGCATCTTATAGTCATGGGCCATCTCAATATTACCATTAAACTTTTAAG  
CAAAAAGATCATTTCTATTTTAAAAAACCTAATAAAAATTACCTTTTGTAAGTATACGTTTGCTAAACAA  
TAAAAGAACGTAATACTAA

>4

AGATTTGAGCAATAATTTCCCTAAAACATTTACAATTAATGGGTTATTTTTTTTTTTT-CTAAAAATTGAAGG  
AGCTTGTTTTGATCTATTCCGTTATTAGTATGTAAATTTAAAAAATCGTATCCCTAACTAATTCATACTTA  
AACATAATATGCAGATTTTAAAAATAATTGTCCATATAGATAACACGCGGAATACTTAGAAAAGTAGAATT  
GGCCGAAGCCAAAAAGGAAACATAGAAATCAACCAGGACTAACCAATGCTTCTTCATATTAACGAGTAAC  
GCGGCTTACGCATCACAAAAGCAGTACGTGTGAATAAATATTATTGGAAAACATTTTTCTTTAACCAGCTA  
AACCGCTTAAAGAAAAATGAATAAGATACAAATTTTCAGGTTTTTGCTTTGATGCTAAAAACTCGTCGAA  
TTCTAAAACCAAGAATTAACGTACCCTTAACTTTTTTTTTTTT-GATTTTTCGTACTAATAATTATCGGAG  
TTCGCGTTTTTCATTTTAAAAAAA-GGTTTAGTAAATCTCAAATTGCGA-----ACAATGATAATGATATT  
TTCAGATAAACGTTACTTAATAGCATCTTATAGTCATGGGCCATCTCAATATTACCATTAAACTTTTAAG  
CAAAAAGATCATTTCTATTTTAAAAAACCTAATAAAAATTACCTTTTGTAAGTATACGTTTGCTAAACAA  
TAAAAGAACGTAATACTAA

>5

AGATTTGAGCAATAATTTCCCTAAAACATTTACAATTAATGGGTTATTTTTTTTTTTT-CTAAAAATTGAAGG  
AGCTTGTTTTGATCTATTCCGTTATTAGTATGTAAATTTAAAAAATCGTATCCCTAACTAATTCATACTTA  
AACATAATATGCAGATTTTAAAAATAATTGTCCATATAGATAACACGCGGAATACTTAGAAAAGTAGAATT  
GGCCGAAGCCAAAAAGGAAACATAGAAATCAACCAGGACTAACCAATGCTTCTTCATATTAACGAGTAAC  
GCGGCTTACGCATCACAAAAGCAGTACGTGTGAATAAATATTATTGGAAAACATTTTTCTTTAACCAGCTA  
AACCGCTTAAAGAAAAATGAATAAGATACAAATTTTCAGGTTTTTGCTTTGATGCTAAAAACTCGTCGAA  
TTCTAAAACCAAGAATTAACGTACCCTTAACTTTTTTTTTTTT-GATTTTTCGTACTAATAATTATCGGAG  
TTCGCGTTTTTCATTTTAAAAAAA-GGTTTAGTAAATCTCAAATTGCGATACGAACAATGATAATGATATT  
TTCAGATAAACGTTACTTAATAGCATCTTATAGTCATGGGCCATCTCAATATTACCATTAAACTTTTAAG  
CAAAAAGATCATTTCTATTTTAAAAAACCTAATAAAAATTACCTTTTGTAAGTATACGTTTGCCAAACAA  
TAAAAGAACGTAATACTAA

>6

AGATTTGACCAATAATTTCCCTAAAACATTTACAATTAATGCGTTATTTTTTTTTTTTCTAAAAATTGAAGG  
AGCTTGTTTTGATCTATTCCGTTATTAGTATGTAAATTTAGAAAATCGTATCCCTAACTAATTCATACTTA  
AACCTAATATGCAGATTTTAAAAATAATAGTCCATAAAGATAACACACGGAATACTTAAAAAGGTAGAATT  
GGCCGAAGCCAAAAAGGAAACATAGAAATCAACCAGGACTAACCAATGCTTCTTCATATTAACGAGTAAC  
--GGCTTACGCATCACAAAAGCAGTACATGTGAATAAATATTATTGGAAAACATTTTTCTTTAACCAGCTA  
AACCGCTTAAAGAAAAATGAATAAGATACAAATCTTCAGGTTTTTGCTTTGATGCTAAAAACTCGTCGAA  
TTTTAAAACCAAGAATTAACGTACCCTTCACTTTTTTTTTTTTGGATTTTCGTAATAATGATATTATCGGAG  
TTCGCGTTTTTCATTTTAAAAAAA-GGTTTAGTAAATCTCAAATTGCGATACGAACAATGATAATGATATT  
TTCAGATAAACGTTACTTAATAGCATCTTATAGTCATGGGCCATCTCAATATTACCATTAAACTTTTAAG  
CAAAAAGATCATTTCTATTTTAAAAAATCTAATAAAAATTACCTTTTGTAAGTATACGTTTGCTAAACAA  
TAAAAGAACATATTACTAA

>7

AGATTTGAGCAATAATTTCCCTAAAACATTTACAATTAATGGGTTATTTTTTTTTTTT-CTAAAAATTGAAGG  
AGCTTGTTTTGATCTATTCCGTTATTAGTATGTAAATTTAAAAAATCGTATCCCTAACTAATTCATACTTA  
AACATAATATGCAGATTTTAAAAATAATTGTCCATATAGATAACACGCGGAATACTTAGAAAAGTAGAATT  
GGCCGAAGCCAAAAAGGAAACATAGAAATCAACCAGGACTAACCAATGCTTCTTCATATTAACGAGTAAC  
GCGGCTTACGCATCACAAAAGCAGTACGTGTGAATAAATATTATTGGGAAAACATTTTTCTTTAACCAGCTA  
AACCGCTTAAAGAAAAATGAATAAGATACAAATTTTCAGGTTTTTGCTTTGATGCTAAAAACTCGTCGAA  
TTCTAAAACCAAGAATTAACGTACCCTTAACTTTTTTTTTTTT-GATTTTTCGTACTAATAATTATCGGAG  
TTCGCGTTTTTCATTTTAAAAAAA-GGTTTAGTAAATCTCAAATTGCGA-----ACAATGATAATGATATT  
TTCAGATAAACGTTACTTAATAGCATCTTATAGTCATGGGCCATCTCAATATTACCATTAAACTTTTAAG  
CAAAAAGATCATTTCTATTTTAAAAAACCTAATAAAAATTACCTTTTGTAAGTATACGTTTGCTAAACAA  
TAAAAGAACGTAATACTAA

>8

AAATTTGAGCAATAATTTCCCTAAAACATTTACAATTAATGGGTTATTTTTTTTTTT-CTAAAAATTGAAGG  
AGCTTGTTTTGATCTATTCCGTTATTAGTATGTAAATTTAAAAAATCGTATCCCTAACTAATTCATACTTA  
AACATAATATGCAGATTTTAAAATAATTGTCCATATAGATAACACGCGGAATACTTAGAAAAGTAGAATT  
GGCCGAAGCCAAAAAGGAAACATAGAAATCAACCAGGACTAACCAATGCTTCTTCATATTAACGAGTAAC  
GCGGCTTACGCATCACAAAGCAGTACGTGTGAATAAATATTATTGGAAAACATTTTTCTTTAACCAGCTA  
AACCGCTTAAAGAAAAATGAATAAGATACAAATTTTCAGGTTTTTGCTTTGATGCTAAAACTCGTCGAA  
TTCTAAAACCAAGAATTAACGTACCCTTAACTTTTTTTTTTT-GATTTTCGTACTAATAATTATCGGAG  
TTCGCGTTTTTCATTTTTAAAAAAA-GGTTTAGTAAATCTCAAATTGCGATACGAACAATGATAATGATATT  
TTCAGATAAACGTTACTTAATAGCATCTTATAGTCATGGGCCATCTCAATATTACCATTAAACTTTTAAG  
CAAAAAGATCATTTCTATTTTTAAAAAACCTAATAAAAAATTACTTTTGTAAAGTATACGTTTGCTAAACAA  
TAAAAGAACGTAATACTAA

>9

AGATTTGACCAATAATTTCCCTAAAACATTTACAATTAATGCGTTATTTTTTTTTTTCTAAAAATTGAAGG  
AGCTTGTTTTGATCTATTCCGTTATTAGTATGTAAATTTAGAAAATCGTATCCCTAACTAATTCATACTTA  
AACCTAATATGCAGATTTTAAAATAATAGTCCATAAAGATAACACGCGGAATACTTAAAAAAGTAGAATT  
GGCCGAAGCCAAAAAGGAAACATAGAAATCAACCAGGACTAACCAATGCTTCTTCATATTAACGAGTAAC  
--GGCTTACGCATCACAAAGCAGTACATGTGAATAAATATTATTGGAAAACATTTTTCTTTAACCAGCTA  
AACCGCTTAAAGAAAAATGAATAAGATACAAATCTTCAGGTTTTTGCTTTGATGCTAAAACTCGTCGAA  
TTTTAAAACCAAGAATTAACGTACCCTTCACTTTTTTTTTTTGATTTTCGTACTAATGATTATCGGAG  
TTCGCGTTTTTCATTTTTAAAAAAA-GGTTTAGTAAATCTCAAATTGCGATACGAACAATGATAATGATATT  
TTCAGATAAACGTTACTTAATAGCATCTTATAGTCATGGGCCATCTCAATATTACCATTAAACTTTTAAG  
CAAAAAGATCATTTCTATTTTTAAAAAATCTAATAAAAAATTACTTTTGTAAAGTATACGTTTGCTAAACAA  
TAAAAGAACATATTACTAA

>10

AGATTTGAGCAATAATTTCCCTAAAACATTTACAATTAATGGGTTATTTTTTTTTTT-CTAAAAATTGAAGG  
AGCTTGTTTTGATCTATTCCGTTATTAGTATGTAAATTTAAAAAATCGTATCCCTAACTAATTCATACTTA  
AACATAATATGCAGATTTTAAAATAATTGTCCATATAGATAACACGCGGAATACTTAGAAAAGTAGAATT  
GGCCGAAGCCAAAAAGGAAACATAGAAATCAACCAGGACTAACCAATGCTTCTTCATATTAACGAGTAAC  
GCGGCTTACGCATCACAAAGCAGTACGTGTGAATAAATATTATTGGAAAACATTTTTCTTTAACCAGCTA  
AACCGCTTAAAGAAAAATGAATAAGATACAAATTTTCAGGTTTTTGCTTTGATGCTAAAACTCGTCGAA  
TTCTAAAACCAAGAATTAACGTACCCTTAACTTTTTTTTTTT-GATTTTCGTACTAATAATTATCGGAG  
TTCGCGTTTTTCATTTTTAAAAAAA-GGTTTAGTAAATCTCAAATTGCGATACGAACAATGATAATGATATT  
TTCAGATAAACGTTACTTAATAGCATCTTATAGTCATGGGCCATCTCAATATTACCATTAAACTTTTAAG  
CAAAAAGATCATTTCTATTTTTAAAAAACCTAATAAAAAATTACTTTTAGTAAGTATACGTTTGCTAAACAA  
TAAAAGAACGTAATACTAA
