# Supplementary material for: A Geographically Diverse Collection of Schizosaccharomyces pombe Isolates Shows Limited Phenotypic Variation but Extensive Karyotypic Diversity
Source: PubMed Central journal article supplement (PMC3276172; doi:10.1534/g3.111.001123), 2011-12-01
Supplement: supp_1.7.615_TableS3.pdf [file supp_1.7.615_TableS3.pdf]

**Table S3 Primers used to make probes used in hybridization analysis**

| Name           | Sequence                       | Chromosome | Position        |
|----------------|--------------------------------|------------|-----------------|
| CENDistal1LF   | CCCAAGAAACGTCATGTGTG           | 1          | 196555-196574   |
| CENDistal1LR   | CTACCAGGAGCCTTCAGTGC           | 1          | 197476-197457   |
| CENDistal1RF   | CACTTCGTGCAAAGCAAAA            | 1          | 4745750-4745769 |
| CENDistal1RR   | ACAATTGCCAACCTCCTCAC           | 1          | 4746658-4746639 |
| CENDistal2LF   | TTGGTCTCGAAGGAGCATCT           | 2          | 751963-751982   |
| CENDistal2LR   | ATTCCACCAATTTCCAACA            | 2          | 752829-752810   |
| CENDistal2RF   | TTCGATAGGTCGGATTCCAG           | 2          | 3761023-3761042 |
| CENDistal2RR   | ATCTCTGCCAACCAACCAAC           | 2          | 3761895-3761876 |
| CENDistal3LF   | TCAAACAATCCATCGGACAA           | 3          | 501513-501532   |
| CENDistal3LR   | GATGCGGAAGCTAAATCGAG           | 3          | 502474-502455   |
| CENDistal3RF   | GTGACGTAATGCCCGAGTT            | 3          | 2004488-2004507 |
| CENDistal3RR   | AGATTCGGGTTTCAGTGGTG           | 3          | 2005446-2005465 |
| CENproximal1LR | AAAGGCTGTCTGGTGTATGG           | 1          | 3733956-3733937 |
| CENproximal1LF | CGGTGAACCTGACAATGATG           | 1          | 3733183-3733202 |
| CENproximal1RF | CGTCAATCCTCAATTCAGAGTTCC       | 1          | 3792899-3792922 |
| CENproximal1RR | TATGTCAAAGAAGCCTCGATAAAGAAG    | 1          | 3793712-3793738 |
| CENproximal2LF | GATCGATATCACCAGGCTTGTC         | 2          | 1572261-1572283 |
| CENproximal2LR | GCGAGAAATTGCCAATTGCCGAC        | 2          | 1573046-1573068 |
| CENproximal2RF | AAGTGACATCACAAGTCCGACTTC       | 2          | 1650281-1650304 |
| CENproximal2RL | AACTTGAAACCAATAAAATTGAG        | 2          | 1651324-1651301 |
| CENproximal3LF | AATAGGGAAGCCGATTGTTCTTACAGATGT | 3          | 1061733-1061762 |
| CENproximal3LR | TATCTATGGAAAGCATTAGAACGA       | 3          | 1062572-1062549 |
| CENproximal3RF | GTTTCGTCATTTATTAATCATTAG       | 3          | 1145013-1145036 |
| CENproximal3RR | AACCCCTTACACCTCCTCAAGATC       | 3          | 1145732-1145709 |
