# Supplementary material for: A Geographically Diverse Collection of Schizosaccharomyces pombe Isolates Shows Limited Phenotypic Variation but Extensive Karyotypic Diversity
Source: PubMed Central journal article supplement (PMC3276172; doi:10.1534/g3.111.001123), 2011-12-01
Supplement: supp_1.7.615_TableS4.pdf [file supp_1.7.615_TableS4.pdf]

**Table S4 Primers used to amplify DNA for diversity analys**

| Sequence                                    | Primer F      | Sequence                | Primer R      | Sequence                 |
|---------------------------------------------|---------------|-------------------------|---------------|--------------------------|
| SPBC660.16 intron 3                         | SPBC660L      | gccgacaagggtaagttt      | SPBC660R      | ttaccttggcttcgtttc       |
| Central core of centromere of chromosome II | CNT21L        | cacagaagcgagacatggtt    | CNT21R        | ggataagacacttcgcaaaa     |
| TER                                         | TRC19F        | tgttgatctacctgttatattca | TRC1409R      | aaaaagaggcctggacatca     |
| TER                                         | TRC667F       | aacctaaaacgcctcaaga     | TRC1983R      | ttgaatgtaatgtagcccttaaaa |
| CEN2:left flank                             | CENFlank2LF   | gatcgatatcaccaggcttggtc | CENFlank2LR   | gcgagaaattgccaattgccgac  |
| CEN2:right flank                            | CENFlank2iRF  | gcactgctgttacggtcaag    | CENFlank2iRR  | aagctggttggcttttatcc     |
| TER; I-3113975-3114540                      | TRCflank1F    | gccagatcaaatggctcaat    | TRCflank1R    | acaacgttgggatcaagagg     |
| TER; I-3194538-3195201                      | 100TRCFlank1F | ttaaagcctcttgctcctt     | 100TRCFlank1R | ctcaccgcatctcgactca      |
